# Supplementary material for: Differential activation of JAK-STAT signaling in blood cell progenitors reveals functional compartmentalization of the Drosophila lymph gland
Source: bioRxiv preprint, doi:10.1101/2020.07.26.219717, version 1 (2020-07-26)
Supplement: Supplementary Table S1 [file 219717_file03.xlsx]

## Sheet: RPKM
Symbol	Fbgn	ant 1	ant 2	ant 3	post 1	post 2	post 3
a	FBgn0000008	3.34454	5.84965	3.75302	2.36976	2.58987	2.05249
Abl	FBgn0000017	21.3609	22.9332	11.5866	4.95482	7.8224	6.20237
abo	FBgn0000018	1.55694	1.22805	1.83449	1.67752	1.00658	1.05636
Acph-1	FBgn0000032	7.32837	7.55149	8.34224	7.4736	8.13473	5.23485
mAChR-A	FBgn0000037	1.22503	2.18282	1.23968	0.116788	0.646154	0.127028
Act5C	FBgn0000042	6819.24	4687.38	2643.33	3349.98	3076.6	2632.57
Act42A	FBgn0000043	1489.1	1330.38	1139.44	1306.55	917.928	756.939
Act57B	FBgn0000044	19.3861	29.7914	56.7714	39.2309	21.0723	53.7632
Act79B	FBgn0000045	2.49862	3.31694	2.12117	1.51643	1.50905	0.851301
Act87E	FBgn0000046	17.5296	22.2224	20.1435	29.0269	15.1138	38.6314
ade2	FBgn0000052	3.04109	2.91912	3.67892	4.67964	2.80293	3.4775
ade3	FBgn0000053	1.49108	1.95885	2.5445	5.98118	4.24451	7.22647
Adf1	FBgn0000054	7.65175	5.27833	8.34695	8.31566	6.19639	12.0119
adp	FBgn0000057	2.31225	1.80309	2.74814	1.65929	2.55011	1.76719
Mps1	FBgn0000063	2.78915	2.37961	2.40601	2.07147	2.97685	1.00585
Ald	FBgn0000064	52.9749	65.4678	68.5588	71.0463	69.4959	69.6772
Ama	FBgn0000071	26.8259	18.0434	9.8531	6.99992	1.36464	0.973845
amx	FBgn0000077	1.49012	2.03348	1.40877	1.22527	1.34461	0.787506
AnxB9	FBgn0000083	108.117	140.95	144.885	118.776	105.968	93.9531
AnxB10	FBgn0000084	2.62609	1.32506	2.06546	2.92145	2.12959	0.621707
aop	FBgn0000097	41.2706	33.6286	27.2329	19.3708	21.8914	17.4683
RpLP0	FBgn0000100	192.632	206.129	261.183	203.419	205.409	195.439
Aprt	FBgn0000109	3.96206	2.29268	1.12118	1.78406	1.56059	1.77175
Arl1	FBgn0000115	17.1873	6.22263	11.938	9.17691	5.66199	7.586
arm	FBgn0000117	45.3743	40.3737	38.2217	41.0872	39.9085	33.4751
arr	FBgn0000119	2.98988	2.17149	2.85041	4.07553	2.60975	3.10302
ash2	FBgn0000139	3.49064	3.08044	4.60963	3.75609	3.32692	2.89064
asp	FBgn0000140	2.32507	3.38916	4.67336	3.72367	3.88828	7.73339
aurA	FBgn0000147	1.16043	1.57167	2.2684	1.60704	3.83942	1.6387
awd	FBgn0000150	90.4865	111.558	79.7135	63.1831	94.9732	127.73
baz	FBgn0000163	2.36668	1.97441	1.68119	2.00606	2.96576	2.65535
ben	FBgn0000173	46.1591	52.3004	40.9521	44.4144	56.4442	46.6043
bib	FBgn0000180	3.55745	1.26095	2.62071	3.43283	1.19972	1.23584
bic	FBgn0000181	362.274	396.966	353.376	299.114	440.011	383.679
BicD	FBgn0000183	18.3417	21.6636	14.2102	15.7155	22.8368	24.3946
br	FBgn0000210	633.052	439.115	281.869	348.578	438.473	385.566
brm	FBgn0000212	14.8509	13.8999	14.6491	13.6971	14.7465	12.0354
Bsg25D	FBgn0000228	3.96697	5.47669	4.189	4.62101	4.61097	3.89574
bsk	FBgn0000229	16.1799	13.8514	21.9103	18.9162	15.4756	23.5202
bur	FBgn0000239	20.6788	20.4599	24.8434	24.1453	22.8402	24.7144
by	FBgn0000244	1.75523	1.29793	1.28883	1.01194	1.31278	0.974364
c(3)G	FBgn0000246	2.23479	3.29967	2.9391	1.08447	2.14145	2.32636
ca	FBgn0000247	4.00288	4.56634	5.1322	4.93711	3.1598	3.99687
cact	FBgn0000250	80.8427	72.866	55.5746	49.1048	52.0574	42.604
Cam	FBgn0000253	619.49	694.898	277.786	283.566	679.964	479.586
capu	FBgn0000256	4.75405	4.61192	3.64606	2.99526	3.93233	2.80234
car	FBgn0000257	1.62279	4.08146	1.7412	2.32277	1.85602	1.82764
CkIIbeta	FBgn0000259	87.6718	92.0062	47.9811	53.3485	83.0613	82.1397
Cat	FBgn0000261	45.6207	37.2393	28.8622	32.7834	23.3447	33.3672
Pka-C1	FBgn0000273	26.4637	29.0303	17.6208	18.9519	24.9742	22.7503
CecA2	FBgn0000277	4.88362	37.6239	4.43379	2.0078	19.4494	2.18386
Cp190	FBgn0000283	41.6852	31.7537	28.0315	25.1076	34.4182	42.1977
Cf2	FBgn0000286	28.638	27.922	18.1723	23.4195	24.962	18.1066
cg	FBgn0000289	24.5713	22.218	20.9536	19.4892	22.364	19.0402
Col4a1	FBgn0000299	370.562	404.019	160.313	34.4021	87.3396	14.9646
chif	FBgn0000307	16.896	10.2379	12.0427	11.8994	11.5726	11.931
chic	FBgn0000308	1713.45	1598.83	655.324	809.961	1181.74	1064.03
cin	FBgn0000316	13.3747	10.9634	13.224	12.724	11.3775	14.7787
ck	FBgn0000317	1.45696	1.74816	2.1452	2.34253	1.92247	2.10582
cl	FBgn0000318	219.401	218.467	187.856	103.42	141.533	115.015
Chc	FBgn0000319	91.5224	82.7824	93.147	86.539	80.9232	64.1756
clt	FBgn0000326	1.4625	1.19476	2.40554	1.84678	1.20971	1.962
cm	FBgn0000330	7.7096	4.03617	5.80751	6.60717	5.02977	5.29277
cni	FBgn0000339	13.4451	16.0761	20.2167	21.1057	14.4687	12.1705
comt	FBgn0000346	3.21365	2.45327	1.20517	2.15501	2.16783	0.892942
cos	FBgn0000352	7.19891	7.92118	9.16284	7.54888	7.73875	6.32991
crc	FBgn0000370	71.4138	54.7082	69.8941	71.1915	62.251	64.071
crm	FBgn0000376	5.97326	3.33077	4.27136	3.68878	3.1982	4.89891
crn	FBgn0000377	2.2303	4.13323	4.35653	3.76966	2.96079	2.25326
csw	FBgn0000382	10.4677	8.87799	7.5216	7.79088	9.56161	9.84525
cta	FBgn0000384	33.6966	26.752	28.8873	28.0226	34.0116	33.6897
cv	FBgn0000394	6.56805	6.70704	8.2244	8.13956	7.03675	6.83925
cv-2	FBgn0000395	21.4925	16.1901	19.1713	25.7586	23.9979	23.6793
CycA	FBgn0000404	9.76686	14.5762	16.814	14.868	14.1923	18.4145
CycB	FBgn0000405	4.4254	9.89673	9.20438	9.0971	12.3759	9.80996
Cyt-c-p	FBgn0000409	19.3763	30.3294	11.9767	17.3279	29.6366	22.6421
D1	FBgn0000412	71.9418	83.8498	56.2604	65.8215	79.9084	91.8317
da	FBgn0000413	16.8145	15.1721	10.4051	11.6278	16.6279	13.2929
Dab	FBgn0000414	3.16897	3.20844	2.34625	3.31481	3.35745	3.11297
Sap-r	FBgn0000416	245.309	205.509	219.687	169.688	133.299	126.122
SmF	FBgn0000426	19.5931	22.7036	11.0305	10.8535	7.73364	7.5627
Dhod	FBgn0000447	8.89874	7.95117	8.84595	6.61766	7.57711	15.8003
Dip-B	FBgn0000454	83.4401	76.9052	74.1321	93.2125	42.7523	45.9391
Dip-C	FBgn0000455	5.52915	6.77539	12.5415	14.1669	5.66237	8.47723
Lar	FBgn0000464	3.24252	2.81066	2.8931	3.18718	3.17531	2.42498
dnc	FBgn0000479	3.50439	4.0773	2.32437	1.74695	3.94766	2.99477
dor	FBgn0000482	8.34879	6.8826	9.32511	10.0468	5.71277	6.70379
Pka-C3	FBgn0000489	1.30872	0.98004	2.03688	1.40919	1.34026	1.44915
dpp	FBgn0000490	8.405	6.25889	4.41841	2.38471	1.91504	0.74345
dsh	FBgn0000499	5.21541	4.89003	3.62255	3.75934	4.85552	3.42262
dsx	FBgn0000504	8.40489	7.84833	5.34239	8.65189	7.65028	7.28864
dx	FBgn0000524	9.56113	9.49625	8.74692	11.234	11.7102	12.8942
eas	FBgn0000536	5.87012	7.11244	8.99921	4.51868	4.84401	4.11436
E(bx)	FBgn0000541	69.6166	53.3311	45.7458	43.2547	59.1023	66.436
ecd	FBgn0000543	1.74802	1.37446	2.98646	1.72479	1.10851	1.52427
EcR	FBgn0000546	41.3904	54.0996	37.782	42.6199	65.7082	46.2702
ed	FBgn0000547	23.3107	29.7894	24.8543	22.1381	39.5467	41.4818
Ef1alpha48D	FBgn0000556	11354	8919.59	9336.02	7100.42	8826.41	9868.15
EF2	FBgn0000559	316.146	299.497	502.549	375.822	334.904	359.447
egl	FBgn0000562	7.48767	7.56335	7.32091	6.56026	6.9169	9.25324
Eip71CD	FBgn0000565	86.357	60.102	58.9694	33.9832	25.0262	35.627
Eip55E	FBgn0000566	52.9802	80.1206	89.6494	50.3687	38.2348	46.9754
Eip74EF	FBgn0000567	68.0775	57.0584	31.74	29.5757	40.6934	33.3967
Eip75B	FBgn0000568	47.4311	47.5398	25.148	27.5019	41.0491	37.5278
emc	FBgn0000575	402.232	508.647	242.605	228.507	416.082	226.725
ems	FBgn0000576	0.893972	0.333403	0.0577444	1.24644	1.8004	1.39049
ena	FBgn0000578	74.6744	75.0923	34.695	37.8841	37.209	24.9986
Eno	FBgn0000579	17.2788	17.9619	23.3609	23.644	21.3705	27.1537
E(Pc)	FBgn0000581	22.3939	20.8066	15.8307	16.5614	19.5446	18.714
esc	FBgn0000588	1.97832	5.41409	4.70251	3.67168	2.36884	5.56075
exd	FBgn0000611	40.1948	44.0776	37.4844	50.4154	60.1892	50.8968
exu	FBgn0000615	1.66869	1.5067	3.78385	3.32193	2.74439	5.10562
e(y)1	FBgn0000617	5.65555	6.61527	9.67516	8.45517	8.22195	7.35724
E(z)	FBgn0000629	6.93907	6.09684	5.85249	5.61658	5.42081	8.8242
Fas2	FBgn0000635	1.70062	1.2062	1.15554	0.932236	1.17768	1.06114
Fas3	FBgn0000636	5.33145	6.58073	3.83046	6.37215	5.86384	7.53017
Fbp1	FBgn0000639	19.4577	9.21945	3.42757	47.2666	11.4961	4.35056
Fbp2	FBgn0000640	0.538077	0.384625	6.92804	10.1024	1.28576	3.36864
fl(2)d	FBgn0000662	16.0796	15.0323	12.4009	12.7428	10.5974	11.2559
Actn	FBgn0000667	7.34426	7.93996	8.38676	7.18058	7.79754	9.11735
fliI	FBgn0000709	4.03062	4.99207	5.45446	5.18462	4.13716	3.40852
flw	FBgn0000711	9.70816	12.3978	9.671	9.33469	11.1292	9.64957
fog	FBgn0000719	41.9657	44.3042	27.0311	19.0873	27.4298	20.2492
for	FBgn0000721	3.96161	2.90136	4.66712	5.7263	3.78659	5.94247
FER	FBgn0000723	9.8795	7.73329	7.00385	6.39381	7.56079	6.24892
fs(1)K10	FBgn0000810	11.0769	9.74517	9.51749	10.2499	12.2861	10.9511
dup	FBgn0000996	6.20006	7.81065	9.57585	7.67234	7.58258	11.1176
ftz-f1	FBgn0001078	2.88465	4.10792	3.86866	3.19334	7.13028	4.90886
fu	FBgn0001079	0.859169	1.05887	1.36444	2.31427	1.50301	1.24535
fz	FBgn0001085	7.21674	7.10664	8.39725	7.9259	7.7365	5.5968
fzy	FBgn0001086	6.51434	16.7635	9.10446	10.7527	11.6016	12.1271
g	FBgn0001087	18.9613	22.2301	13.1589	13.649	15.292	15.1197
Gal	FBgn0001089	8.62529	8.80782	3.11199	3.07331	0.905961	0.18367
bnb	FBgn0001090	3.53323	1.51536	1.88968	1.07494	0.272769	0.315998
Gapdh1	FBgn0001091	42.6262	57.2181	40.6068	49.9796	43.7815	52.2666
Gapdh2	FBgn0001092	42.9183	48.9521	68.1242	55.8713	54.4002	110.019
Gdh	FBgn0001098	52.4948	43.0189	45.6204	48.1332	25.0712	22.9783
Galphai	FBgn0001104	51.8623	42.0348	32.9517	36.7056	39.0567	30.5473
Gbeta13F	FBgn0001105	240.063	245.284	88.2298	98.7469	158.916	102.159
DCTN1-p150	FBgn0001108	8.27681	9.5933	8.20805	6.49239	6.42012	6.00147
Glt	FBgn0001114	875.151	900.063	331.361	37.45	111.987	19.9455
Galphao	FBgn0001122	37.6104	35.4381	20.9004	28.8145	36.2966	33.315
Galphas	FBgn0001123	24.8086	30.9033	28.1845	23.849	26.2542	26.8375
Got1	FBgn0001124	9.46833	8.47956	8.97348	10.8728	8.52192	9.44145
Got2	FBgn0001125	10.9424	10.5614	22.1155	17.7211	16.2338	21.6594
Gpdh	FBgn0001128	21.0232	16.2509	22.9708	16.7338	16.9513	17.9005
grk	FBgn0001137	3.53195	7.29354	2.58196	7.37571	6.24483	5.46529
gro	FBgn0001139	25.3167	22.5629	17.4407	17.777	23.343	22.7582
Gs1	FBgn0001142	60.338	42.4121	39.8336	44.8209	22.2999	15.9986
Gs2	FBgn0001145	15.5849	2.22189	5.77237	5.67973	0.380901	0.965274
GstD1	FBgn0001149	4833.5	5412.76	4437.51	5205.09	4859.96	5368.64
h	FBgn0001168	103.163	115.169	71.2082	42.0913	64.8261	50.9837
H	FBgn0001169	24.9452	24.6311	21.8306	25.2469	30.9436	31.3057
hay	FBgn0001179	4.03148	3.6153	6.75161	4.67104	3.67822	2.36003
her	FBgn0001185	7.33102	4.69022	7.64193	6.42766	5.80702	7.78819
Hex-A	FBgn0001186	22.642	20.6926	16.5596	13.5088	24.3809	29.1993
hfw	FBgn0001189	10.8427	14.2772	9.93815	10.2971	10.6643	9.21522
His2Av	FBgn0001197	111.582	116.096	127.192	162.858	135.297	136.812
hook	FBgn0001202	8.14756	6.95312	8.33717	5.91326	5.68483	5.13054
Hmr	FBgn0001206	5.00448	3.28405	4.17449	3.37294	3.25729	4.03557
Hrb98DE	FBgn0001215	400.818	359.725	113.669	99.0031	297.411	254.717
Hsc70-3	FBgn0001218	642.382	732.1	529.503	573.222	650.544	776.877
Hsc70-5	FBgn0001220	24.1284	26.672	33.7894	19.5688	29.5187	38.6485
Hsf	FBgn0001222	10.9555	10.5519	11.5554	11.2399	9.67331	8.37729
Hsp23	FBgn0001224	269.009	183.023	89.9981	153.556	113.914	95.6906
Hsp26	FBgn0001225	64.8463	67.3481	29.0431	37.0892	44.8033	37.5268
Hsp27	FBgn0001226	529.619	328.799	237.695	360.51	226.312	271.249
Hsp68	FBgn0001230	52.1944	37.2784	16.5475	15.5838	20.3306	31.2749
Hsp83	FBgn0001233	159.734	386.245	430.722	190.768	346.807	431.695
Hsromega	FBgn0001234	350.379	655.243	299.271	505.389	862.106	496.154
hth	FBgn0001235	6.6304	7.66462	3.43253	2.72262	3.9927	4.26376
Ide	FBgn0001247	11.0347	6.96686	11.4423	9.78733	8.58687	10.4702
Idh	FBgn0001248	19.1919	20.5921	20.8698	31.3013	20.4243	16.209
if	FBgn0001250	1.93881	0.916291	2.9994	1.75232	1.46674	1.61935
ImpL2	FBgn0001257	14.0844	9.91284	7.61862	26.1317	23.5788	28.0677
inaD	FBgn0001263	1.6941	1.83122	0.429701	1.39299	1.59495	1.40427
ix	FBgn0001276	7.15413	7.5761	4.52694	2.72341	4.38338	4.14709
janA	FBgn0001280	7.02845	8.37338	10.2484	5.99327	8.03856	7.91566
Jra	FBgn0001291	17.8319	15.2622	19.2588	21.222	13.844	15.2137
kar	FBgn0001296	2.40969	1.4911	3.5265	2.18841	1.18996	1.31881
kay	FBgn0001297	74.9356	76.4583	46.2027	59.8271	73.9162	51.2599
kel	FBgn0001301	10.2366	9.20318	7.99593	8.38826	9.38867	10.6025
Khc	FBgn0001308	31.3972	22.8135	23.6303	23.1754	23.6275	18.5349
klar	FBgn0001316	36.7688	34.7148	34.8659	26.0294	28.8383	24.305
kn	FBgn0001319	18.7543	19.066	15.5441	18.974	35.416	38.4898
kto	FBgn0001324	2.30385	2.88637	3.88273	4.02298	2.47255	3.27903
kz	FBgn0001330	0.613164	2.06876	1.60326	1.49238	1.56888	2.25936
L	FBgn0001332	9.95361	7.5335	7.12191	6.64988	7.14347	6.5784
l(1)1Bi	FBgn0001341	6.28146	6.13643	9.91524	9.46917	11.142	13.6468
egh	FBgn0001404	132.243	85.6832	59.2374	41.9597	55.4132	44.2715
l(1)10Bb	FBgn0001491	4.94985	7.81356	5.05566	6.35948	13.9888	7.83939
Hlc	FBgn0001565	6.00836	5.20588	13.3894	10.33	8.88546	14.2483
Grip91	FBgn0001612	3.34448	2.19789	3.7666	3.48191	3.5993	4.67974
dlg1	FBgn0001624	22.5114	20.4299	13.4944	14.6554	18.4288	15.8505
ifc	FBgn0001941	51.5055	39.7259	51.8143	31.7003	30.984	28.3745
eIF-4a	FBgn0001942	408.449	418.75	295.47	266.714	313.318	337.374
Arpc1	FBgn0001961	11.2887	9.85811	10.1617	11.0656	6.74632	4.12801
Sos	FBgn0001965	4.80297	4.91159	4.21527	3.4855	4.73153	4.00514
l(2)35Bd	FBgn0001974	3.92014	4.98164	7.84612	7.78984	4.80379	5.16164
CIAPIN1	FBgn0001977	8.08758	8.87605	11.105	13.4681	5.81123	10.0461
stc	FBgn0001978	3.88051	5.01617	3.38308	4.14613	4.10032	5.25782
l(2)35Df	FBgn0001986	4.11055	4.03293	6.18662	6.64943	4.47414	4.97383
Gli	FBgn0001987	1.63832	1.54091	1.3771	2.53472	4.636	2.6413
ND-B17	FBgn0001989	10.486	9.85523	10.0971	8.22305	7.28148	7.64154
wek	FBgn0001990	5.30613	5.68934	4.71572	4.98632	6.42673	4.1524
crp	FBgn0001994	46.1449	45.4189	24.5094	31.3944	52.6293	32.2099
mRpL4	FBgn0001995	2.37934	5.03433	7.21109	6.88667	3.56879	4.59646
l(2)37Bb	FBgn0002021	1.2406	1.93483	2.84841	1.66925	1.74137	1.46258
Catsup	FBgn0002022	24.0506	23.8413	28.9889	30.3634	30.9038	43.8822
l(2)37Cc	FBgn0002031	12.3179	14.9457	25.9981	20.7055	16.1416	23.9439
swm	FBgn0002044	12.2633	15.5876	9.6651	12.0035	10.5999	9.99471
AspRS	FBgn0002069	2.84782	3.88902	4.67286	3.94935	3.79706	4.86587
l(2)gl	FBgn0002121	47.0316	46.926	50.2227	44.5465	52.6151	43.9771
l(2)tid	FBgn0002174	0.977116	2.39471	2.48853	1.64515	2.66843	2.12232
dre4	FBgn0002183	17.9842	17.9863	18.7297	16.4618	16.2934	19.2358
l(3)73Ah	FBgn0002283	5.14507	4.02103	7.74564	6.4305	6.50659	4.35613
Prosbeta6	FBgn0002284	27.2419	29.3187	51.3853	38.5077	37.8085	39.6942
dco	FBgn0002413	18.9893	18.8853	14.1206	12.5344	15.3906	12.9311
hyd	FBgn0002431	19.6385	15.4477	25.7888	22.0248	21.4132	22.2205
l(3)mbt	FBgn0002441	2.78349	4.56605	3.71113	2.69956	3.38468	2.87243
sti	FBgn0002466	2.08969	2.82905	5.66812	4.90749	4.78392	4.106
pho	FBgn0002521	32.8064	32.3854	28.0051	33.8939	31.0954	31.9094
lace	FBgn0002524	30.463	38.3485	36.8371	35.5075	31.7855	19.152
Lam	FBgn0002525	103.3	101.181	73.1343	75.4033	103.268	89.1146
LanA	FBgn0002526	270.607	172.608	196.667	127.582	102.153	68.2717
lds	FBgn0002542	16.8002	13.5247	11.8737	10.5953	10.2836	10.6491
lin	FBgn0002552	2.16144	2.41175	3.01532	3.6629	3.19776	5.37497
Lsp1beta	FBgn0002563	11.7022	6.66188	35.6555	29.6736	7.61226	19.0519
Lsp1gamma	FBgn0002564	8.24133	6.60675	28.4922	19.9813	12.1047	11.9516
Lsp2	FBgn0002565	2.95519	1.22297	1.15535	0.831294	1.0721	0.452093
lt	FBgn0002566	8.39713	9.6192	13.5414	10.3717	7.91534	8.85802
lz	FBgn0002576	4.02704	2.93814	1.69167	0.228364	0.735113	0.149033
RpL36	FBgn0002579	318.993	419.108	248.427	164.743	237.223	410.991
RpS5a	FBgn0002590	162.264	176.143	176.024	166.393	146	214.918
RpLP1	FBgn0002593	216.836	237.561	174.578	99.099	234.716	233.747
RpL19	FBgn0002607	481.296	540.058	672.873	469.536	446.359	572.29
RpS3	FBgn0002622	1920.53	2082.69	2531.55	2431.19	2192.82	2652.81
RpL32	FBgn0002626	123.299	149.977	212.119	148.942	106.491	191.22
Rcc1	FBgn0002638	7.61567	8.73334	11.7982	10.247	14.8669	12.0197
mal	FBgn0002641	1.83087	1.50182	2.14034	2.1718	5.46181	1.36902
mam	FBgn0002643	23.3703	22.4188	11.6486	13.5284	20.4687	18.5219
Map205	FBgn0002645	71.8943	70.3737	58.9545	55.0552	64.4793	58.059
twe	FBgn0002673	0.97166	1.50487	1.38339	2.19714	1.78603	1.66561
mei-W68	FBgn0002716	0.795652	1.01775	1.8664	1.89383	1.52408	1.31084
Men	FBgn0002719	24.6586	16.7528	11.2182	4.7147	3.00634	3.97919
Met	FBgn0002723	1.91193	1.73202	1.85613	2.10133	1.52405	1.42214
E(spl)mbeta-HLH	FBgn0002733	11.6209	12.6714	10.388	1.05272	3.2584	0.70463
mago	FBgn0002736	23.4022	27.4642	23.8701	22.4738	25.617	27.334
Mlc1	FBgn0002772	2.65652	2.72665	6.47652	4.87278	3.30541	6.15293
Mlc2	FBgn0002773	9.43777	9.75796	27.7293	15.7978	9.29343	39.4154
mle	FBgn0002774	4.04688	3.53066	3.94648	3.25934	3.22723	3.58225
msl-3	FBgn0002775	6.6981	4.82284	9.15199	6.71363	7.11754	6.34033
mnd	FBgn0002778	6.09067	7.51755	6.80046	7.80769	4.88146	6.83444
mod	FBgn0002780	89.6617	76.7651	127.949	96.6844	127.682	147.762
mod(mdg4)	FBgn0002781	4.19909	3.45568	4.30469	4.98802	3.4263	3.99109
mor	FBgn0002783	7.73815	7.19073	9.66391	8.68917	7.89412	7.61276
Rpn8	FBgn0002787	30.6802	26.874	28.6742	24.3483	20.385	19.3986
Mp20	FBgn0002789	23.2662	25.5637	23.3956	20.5511	20.2811	44.2518
mr	FBgn0002791	5.0137	2.53295	9.4647	5.54842	5.23844	3.27032
MtnA	FBgn0002868	16.2361	7.08149	4.29272	1.81021	1.36574	0
mu2	FBgn0002872	3.11149	2.10707	3.68414	2.4238	2.83814	3.53603
mud	FBgn0002873	5.21913	3.25082	6.43465	4.40724	6.49643	8.40589
mus101	FBgn0002878	1.78069	1.07486	2.73365	2.31018	1.41835	1.34485
mus201	FBgn0002887	4.75483	4.00886	5.14402	4.31071	4.86747	3.85999
mus205	FBgn0002891	1.09871	1.50955	2.28945	1.85379	1.14879	1.07198
mus301	FBgn0002899	1.4602	1.35076	1.40368	1.389	1.76829	1.30594
mus308	FBgn0002905	4.68077	5.21184	4.94799	5.40314	4.50045	4.77667
Blm	FBgn0002906	1.46297	3.12293	2.20323	2.29054	1.83449	2.41969
Myb	FBgn0002914	26.4803	23.1844	24.4349	20.4754	20.7151	19.4465
Atpalpha	FBgn0002921	76.7642	70.8473	43.2913	37.8319	50.7267	42.6579
ncd	FBgn0002924	4.28464	3.64488	4.94504	3.17369	7.49816	5.16213
net	FBgn0002931	2.38084	1.98034	0.578793	1.85089	1.57546	1.16145
neur	FBgn0002932	5.61041	7.70124	6.11016	4.52133	9.7867	6.83691
nkd	FBgn0002945	4.50945	6.33802	2.57235	2.83181	3.73525	5.03709
numb	FBgn0002973	3.64417	3.72529	2.53232	3.60864	3.17634	2.90875
odd	FBgn0002985	26.4694	24.2889	33.0444	28.716	32.3152	66.2482
okr	FBgn0002989	1.40558	1.1961	1.54128	1.56852	0.627452	0.508825
or	FBgn0003008	50.3229	50.5274	40.3366	20.4006	26.3301	31.5048
osp	FBgn0003016	2.5324	2.13201	2.04833	2.0823	3.56872	3.73706
pbl	FBgn0003041	9.79652	10.9089	13.7868	10.9459	8.89333	7.46526
Pc	FBgn0003042	7.08089	7.21476	5.9282	7.26989	6.04035	9.5168
Pcl	FBgn0003044	13.3796	16.6152	15.0141	17.9385	18.8509	18.2342
pcx	FBgn0003048	13.2167	11.8846	9.71727	10.2533	11.1229	9.24031
peb	FBgn0003053	2.52237	3.60605	1.11459	0.340357	0.641965	0.231375
Fib	FBgn0003062	8.84234	12.0144	14.5479	12.0778	14.5876	12.0911
Pfk	FBgn0003071	1.21027	1.03814	2.90954	1.53798	2.42686	2.89302
Pgi	FBgn0003074	3.87612	4.7018	7.03819	6.66412	5.9589	7.24845
Pgm	FBgn0003076	6.89836	4.25863	5.4348	5.28551	3.68873	7.61855
Raf	FBgn0003079	5.94178	4.76601	4.34629	4.62463	6.0778	6.99756
pim	FBgn0003087	2.85599	3.80141	2.48726	3.15815	3.80147	3.96354
Pkc98E	FBgn0003093	18.7726	19.2278	10.412	9.45366	15.6796	12.4764
pn	FBgn0003116	1.58762	1.93345	1.83449	2.27243	1.29699	0.841426
pnr	FBgn0003117	36.7727	32.9004	32.877	43.748	39.8248	31.0511
pnt	FBgn0003118	46.6862	40.7529	31.4523	20.113	28.9386	26.3252
polo	FBgn0003124	4.42794	5.77582	11.38	11.4011	10.159	9.5102
Pp1alpha-96A	FBgn0003134	21.9036	22.3916	13.7296	14.211	18.7629	23.2125
Ppn	FBgn0003137	157.179	86.2184	164.08	16.1978	41.47	14.9104
PpV	FBgn0003139	16.4456	12.9064	14.9498	14.8464	18.1373	27.9765
pr	FBgn0003141	23.1589	26.4355	21.4703	17.1974	21.0864	23.8433
Prm	FBgn0003149	3.70445	3.59921	6.25153	3.8445	3.92687	7.54297
CG2841	FBgn0003159	1.94336	1.85219	1.84878	1.17744	1.46645	1.87528
pum	FBgn0003165	134.326	117.75	84.086	72.6653	96.6171	80.1174
put	FBgn0003169	4.08016	4.52923	4.74235	4.99297	4.12931	4.16431
px	FBgn0003175	15.5776	15.5173	11.9975	11.1138	10.8932	11.928
r	FBgn0003189	2.10851	2.76319	5.68266	3.53418	3.74154	4.09792
ras	FBgn0003204	14.3835	11.915	18.5229	16.2207	13.1946	15.0882
Ras85D	FBgn0003205	78.1151	70.9575	60.5102	43.5622	44.1605	38.0991
Ras64B	FBgn0003206	46.9688	39.5237	41.2489	36.7629	32.7851	34.4032
raw	FBgn0003209	9.61043	9.64501	10.337	6.29022	11.9558	10.658
rb	FBgn0003210	10.6662	13.5321	10.8217	14.2992	11.7193	11.2397
rdgB	FBgn0003218	2.13781	3.07111	1.74219	1.93704	3.06734	1.49431
ref(2)P	FBgn0003231	15.684	12.7634	14.5182	14.3182	8.87047	7.69694
rl	FBgn0003256	17.1163	16.3254	14.5899	14.8774	20.5143	14.0486
r-l	FBgn0003257	9.16393	9.65692	12.4213	12.1184	13.4929	20.7009
Rm62	FBgn0003261	168.508	137.261	149.785	139.16	145.668	157.792
rod	FBgn0003268	2.88397	2.40154	3.53365	2.98256	3.0167	3.16431
RpLP2	FBgn0003274	229.786	239.144	254.436	182.651	193.806	267.408
RpII18	FBgn0003275	26.5269	23.6704	18.25	7.75864	26.5069	20.8585
RpII215	FBgn0003277	36.4473	38.4918	33.4147	30.0868	45.0064	46.7023
RpI135	FBgn0003278	2.0809	2.89763	4.73757	3.46652	3.69578	5.00314
RpL4	FBgn0003279	673.729	667.922	944.704	732.117	723.536	821.785
ry	FBgn0003308	1.35468	1.46046	1.31972	1.18695	0.759267	1.96633
S	FBgn0003310	10.527	6.92974	4.89246	4.82239	8.65135	7.94231
sax	FBgn0003317	6.05125	4.71001	6.29299	4.97571	5.1907	5.80287
sbr	FBgn0003321	19.0576	20.9062	15.5742	12.2417	13.8933	15.6525
scb	FBgn0003328	5.04291	4.15508	4.57524	4.54226	3.33276	2.1518
Sce	FBgn0003330	2.74831	2.14312	3.06225	3.64654	3.30658	4.30146
Scm	FBgn0003334	20.9958	24.4326	17.8643	17.7896	22.4248	25.0442
sd	FBgn0003345	33.226	42.0501	23.0976	22.2792	41.3941	27.2888
RanGAP	FBgn0003346	8.54446	8.37299	13.0516	11.2808	8.98103	12.0547
sei	FBgn0003353	1.41036	3.31847	1.70242	1.57041	2.43038	2.70669
sesB	FBgn0003360	211.789	256.377	238.889	211.02	278.268	319.873
sgg	FBgn0003371	24.4098	25.9459	13.8779	13.122	20.9119	13.1375
shg	FBgn0003391	5.62845	5.37873	4.80695	12.8447	9.69293	14.967
shi	FBgn0003392	30.0896	33.9123	20.7623	22.4671	29.4426	21.4454
shn	FBgn0003396	25.6971	31.6786	29.6018	16.4198	27.7417	30.4787
shu	FBgn0003401	2.38799	5.28348	4.30792	3.41285	5.70624	4.88166
sina	FBgn0003410	13.3369	11.6684	10.7636	11.6716	10.0451	9.0981
skd	FBgn0003415	13.4061	13.3925	9.4293	9.04131	10.0294	11.7169
sl	FBgn0003416	9.6689	12.9499	11.0632	14.8407	14.0497	10.5135
slgA	FBgn0003423	5.59325	6.58892	8.67518	7.02745	8.31532	13.0062
sm	FBgn0003435	3.52029	2.96333	1.53972	1.9091	2.51591	2.65647
smo	FBgn0003444	3.05192	3.16068	5.31948	4.58424	2.35876	1.97729
sn	FBgn0003447	819.632	613.603	230.895	683.165	674.659	512.007
snf	FBgn0003449	28.7217	33.1459	12.6811	13.4682	22.3897	18.363
stwl	FBgn0003459	8.31151	9.40422	10.2019	8.53366	9.38711	9.9577
Sod	FBgn0003462	38.6751	35.2657	38.3048	47.9054	37.732	34.2569
sog	FBgn0003463	2.27259	4.31768	3.8427	2.01619	3.34732	3.02202
sol	FBgn0003464	2.32208	2.52586	1.99987	2.10306	2.33826	1.91124
spir	FBgn0003475	4.19022	8.80574	2.1777	0.779184	1.37168	1.35071
spn-A	FBgn0003479	1.36364	1.94949	2.02587	1.23929	1.02899	2.43916
spz	FBgn0003495	91.7118	103.33	114.279	30.151	38.3287	16.3974
Btk29A	FBgn0003502	19.6646	20.6345	15.8919	19.7158	23.1592	15.5153
srp	FBgn0003507	219.735	170.2	115.548	127.388	141.138	119.743
Sry-delta	FBgn0003512	5.1086	8.37218	9.34809	6.14722	9.3444	9.02642
sqh	FBgn0003514	37.6596	54.1009	35.818	42.7602	39.5815	31.2793
sta	FBgn0003517	83.2865	103.632	98.709	76.0005	84.9473	93.8023
stau	FBgn0003520	15.661	15.5161	10.394	11.5203	10.6442	14.7285
stg	FBgn0003525	12.9196	13.6168	12.796	9.8479	14.8381	16.9246
sub	FBgn0003545	1.95764	2.07103	3.31551	2.41453	2.80673	2.7313
Su(dx)	FBgn0003557	6.12262	8.26518	8.46972	6.86658	14.0584	7.55843
su(f)	FBgn0003559	6.16753	4.52285	5.03238	4.67718	3.55959	3.82976
su(Hw)	FBgn0003567	11.3528	11.2939	10.5705	11.2278	10.9051	11.604
su(sable)	FBgn0003575	3.72133	3.49218	2.6934	3.37375	2.54668	2.79911
Su(var)3-7	FBgn0003598	13.0048	8.91437	8.92368	9.2195	7.40265	8.28837
Su(var)205	FBgn0003607	71.998	79.8361	75.3516	75.1262	64.9412	86.6071
Su(var)2-10	FBgn0003612	12.233	10.985	14.6527	14.5694	12.7114	16.3598
su(w[a])	FBgn0003638	33.5352	29.4471	28.2489	21.3319	26.1899	28.5158
sw	FBgn0003654	6.64649	5.0844	5.2403	4.26665	4.79036	5.6315
sws	FBgn0003656	6.25091	5.03398	4.36735	3.40003	4.64941	3.65482
Syb	FBgn0003660	23.9816	33.2829	34.587	31.4994	22.6703	22.841
T-cp1	FBgn0003676	30.0622	45.064	44.6616	49.8379	40.9337	34.2824
Tbp	FBgn0003687	2.4999	7.14786	1.65065	3.48306	4.05902	3.54004
thr	FBgn0003701	4.12361	6.04561	2.53175	3.32149	3.55008	3.38693
tko	FBgn0003714	1.81045	2.15689	2.86898	3.22543	1.99669	1.34933
tkv	FBgn0003716	9.66851	12.8284	9.26393	17.1864	13.9459	8.3168
Tm1	FBgn0003721	44.5904	53.5475	27.6564	31.5431	35.842	30.686
Egfr	FBgn0003731	1.53894	1.24871	1.25645	2.51943	3.68504	2.66595
Top2	FBgn0003732	17.2898	18.7814	23.53	21.6953	22.2093	27.525
tra	FBgn0003741	6.0337	5.43115	5.64394	4.04252	2.71105	9.7933
tra2	FBgn0003742	8.25265	9.48337	10.8637	11.0377	10.0809	6.02613
trc	FBgn0003744	10.6029	13.2512	9.24804	8.29653	10.3357	12.2665
Treh	FBgn0003748	7.23085	7.34334	6.55027	6.05441	6.56453	8.1626
trx	FBgn0003862	12.1183	9.33845	10.9976	11.8863	12.231	11.5186
tsh	FBgn0003866	0.814165	1.36764	0.755973	1.35565	1.1673	1.00122
ttk	FBgn0003870	52.128	57.8879	39.2519	38.7023	56.0989	55.4781
tub	FBgn0003882	22.2304	18.0528	8.77375	10.4622	9.00202	5.49654
alphaTub84B	FBgn0003884	549.308	520.131	309.866	296.129	339.468	376.326
alphaTub84D	FBgn0003885	30.8891	28.9995	46.396	45.1981	32.7255	33.7168
betaTub56D	FBgn0003887	138.418	158.103	185.734	178.987	169.481	181.638
betaTub60D	FBgn0003888	362.045	205.832	83.3085	66.9304	38.8531	34.9627
betaTub97EF	FBgn0003890	3.60733	3.02061	3.36864	1.44071	1.70504	1.10614
tud	FBgn0003891	19.7322	14.1438	17.6311	21.149	17.299	17.6087
tup	FBgn0003896	3.66198	5.06906	4.70636	4.32547	4.29511	4.83471
RpL40	FBgn0003941	548.079	710.417	414.941	307.533	572.706	716.709
RpS27A	FBgn0003942	1091.2	1360.44	912.444	671.834	1120.37	2189.18
Ubi-p63E	FBgn0003943	64.6402	79.4229	77.61	69.0763	80.8358	72.6077
Ubx	FBgn0003944	0.42737	0.321568	0.167084	4.19843	6.57387	13.0761
ush	FBgn0003963	40.9335	36.1795	26.9282	21.0924	26.1045	18.8698
usp	FBgn0003964	5.86518	9.24618	6.26433	5.65691	5.38462	4.7352
vap	FBgn0003969	11.4317	11.7398	13.7087	13.8776	11.0824	13.4517
vls	FBgn0003978	2.05866	4.51978	4.15072	4.17143	2.59478	3.22207
vn	FBgn0003984	1.48913	3.33792	1.72069	3.11405	3.58878	5.0971
hid	FBgn0003997	13.3998	13.845	8.54697	8.10101	6.87362	6.00286
wupA	FBgn0004028	12.7577	11.1382	17.4342	16.8163	15.0367	48.6449
yrt	FBgn0004049	6.12762	5.18209	3.78241	4.6482	4.42599	4.38038
z	FBgn0004050	6.92999	7.94703	5.28538	4.20514	5.68108	5.03787
Prosalpha4	FBgn0004066	24.0789	31.4967	21.5366	21.1461	20.5041	26.6627
Dhfr	FBgn0004087	3.05533	3.74399	3.24223	3.23008	5.29515	2.08196
bs	FBgn0004101	2.03045	1.29332	1.97119	2.74403	2.08413	3.14646
Pp1-87B	FBgn0004103	240.33	223.076	205.185	178.202	211.917	236.213
Cdk1	FBgn0004106	36.7638	35.6329	39.0127	26.6429	38.3859	38.6918
Cdk2	FBgn0004107	8.21135	4.31235	5.60163	6.78632	10.2112	8.20569
Nrt	FBgn0004108	11.8342	14.2488	15.4087	9.0833	13.2004	8.85355
Tm2	FBgn0004117	2.13789	3.79414	4.32612	5.42526	3.37412	11.5712
boca	FBgn0004132	30.9196	30.9033	24.3904	19.5742	23.84	26.7967
blow	FBgn0004133	6.25647	8.36423	6.07934	5.97869	5.33357	2.54068
kst	FBgn0004167	9.84215	4.62034	12.0183	9.68179	8.01787	10.6022
5-HT1A	FBgn0004168	0.115141	0.329218	0.313608	1.92508	3.30164	1.51034
up	FBgn0004169	3.80695	3.53763	4.29837	4.53894	3.06496	5.07313
mts	FBgn0004177	203.934	184.082	123.763	118.974	149.885	157.814
Csp	FBgn0004179	31.9489	41.6081	40.2196	38.9172	44.3375	43.1124
ct	FBgn0004198	100.708	119.351	50.7749	36.4815	71.4082	32.6147
nonA	FBgn0004227	12.7277	11.2331	13.6336	16.5022	11.5101	14.1727
Hrb87F	FBgn0004237	557.368	360.634	142.364	160.833	326.256	318.431
T48	FBgn0004359	6.21392	12.0322	9.69908	10.2836	10.7135	14.2455
HmgD	FBgn0004362	656.81	600.325	259.748	238.678	483.765	436.755
porin	FBgn0004363	107.37	111.486	104.99	99.8688	127.892	148.501
18w	FBgn0004364	1.10136	1.82849	1.29315	1.88425	1.72403	1.60462
mei-41	FBgn0004367	1.82901	0.958762	2.69914	1.99521	2.03061	2.34464
Ptp4E	FBgn0004368	3.05109	2.72382	2.79095	2.16917	3.18863	2.08531
Ptp99A	FBgn0004369	5.1641	3.48043	4.4936	3.24967	4.0681	4.3358
Ptp10D	FBgn0004370	2.22318	1.81844	1.90612	1.68252	2.64706	2.61153
fwd	FBgn0004373	19.1181	20.721	20.1089	19.9163	18.6277	18.1758
Klp61F	FBgn0004378	2.81159	2.77454	4.62059	4.11226	3.64964	3.80525
Klp67A	FBgn0004379	3.27711	2.85564	3.70941	2.97693	2.99465	2.37265
Klp64D	FBgn0004380	1.4853	1.41561	2.48952	1.12736	0.924051	1.46464
Klp68D	FBgn0004381	3.14841	2.61796	2.76826	3.3549	1.84244	1.8389
Klp98A	FBgn0004387	4.0059	4.43215	5.51145	4.52553	4.07224	5.00023
RasGAP1	FBgn0004390	16.5548	11.859	9.901	9.50244	11.0055	8.00538
shtd	FBgn0004391	3.04656	2.677	4.19491	3.03052	1.95042	2.84434
unk	FBgn0004395	16.3773	18.3652	16.9366	19.6365	25.4313	21.3583
CrebA	FBgn0004396	88.2431	101.052	51.1538	84.9543	149.701	139.572
Vinc	FBgn0004397	5.97535	6.33687	4.6569	4.81262	4.24031	3.0663
Pep	FBgn0004401	122.775	114.023	61.2952	57.185	104.626	80.5875
RpS14a	FBgn0004403	333.646	323.278	288.792	181.511	308.255	313.82
RpS14b	FBgn0004404	207.474	201.123	258.378	152.026	199.993	250.054
me31B	FBgn0004419	45.9392	43.1372	66.5429	63.572	48.3045	60.0886
Cyp1	FBgn0004432	546.496	656.27	549.622	582.777	734.131	598.073
Galphaq	FBgn0004435	27.3336	28.4558	20.8527	21.5699	24.0579	26.0667
Ubc6	FBgn0004436	66.3005	67.8307	60.3808	56.2714	52.5234	69.915
Ten-m	FBgn0004449	186.981	150.132	93.2507	55.6776	54.2747	17.1967
mew	FBgn0004456	52.7109	47.6008	37.9723	45.8988	52.0097	42.4581
	FBgn0004462	5.37203	3.9307	5.40439	3.93027	3.35886	3.55611
RpIII128	FBgn0004463	2.72695	2.61201	3.88921	4.70875	3.24807	2.70715
Su(P)	FBgn0004465	4.22916	4.38832	5.06695	5.04795	4.43853	3.47736
GlyP	FBgn0004507	2.14444	2.89056	5.64352	4.81125	3.54755	4.87694
Fur1	FBgn0004509	6.54204	6.56196	5.0947	4.54635	5.21344	3.68043
Ets97D	FBgn0004510	2.07354	2.51973	3.31157	2.38698	1.94382	1.80813
Oct-TyrR	FBgn0004514	1.59567	3.88928	1.36018	0.903385	0.461592	0.538089
Akh	FBgn0004552	8.80499	2.82584	1.86872	2.36408	1.58543	0.482133
Dbp73D	FBgn0004556	5.14498	5.92172	6.60717	4.80415	7.83816	7.7601
aos	FBgn0004569	1.39934	0.780698	2.38315	1.20675	1.91971	1.77044
Rop	FBgn0004574	10.0405	9.23886	8.24479	9.33669	9.90564	4.63686
ex	FBgn0004583	13.8584	9.61723	12.6319	12.0599	11.3197	11.9683
Rrp1	FBgn0004584	14.234	15.5454	14.3595	14.9639	18.5715	18.6397
B52	FBgn0004587	18.8925	20.2728	18.4462	19.2988	18.7917	19.1935
Eig71Ee	FBgn0004592	31.5651	12.324	0.577755	15.4556	1.2867	2.3767
CycC	FBgn0004597	1.68679	2.29091	2.25537	5.40923	2.04634	1.88575
Fur2	FBgn0004598	11.1282	11.6129	10.2113	10.3492	9.5001	9.92604
zfh1	FBgn0004606	216.059	203.646	102.491	97.9222	146.163	97.3275
Plc21C	FBgn0004611	5.07968	5.96905	4.85926	3.81008	3.15638	3.31312
rho	FBgn0004635	3.14632	2.9834	2.24175	3.00948	7.08159	8.24082
Rap1	FBgn0004636	225.344	263.505	104.04	112.222	185.786	115.884
drk	FBgn0004638	61.3335	60.7618	66.3967	62.3143	64.0372	55.4683
Zw10	FBgn0004643	7.7668	8.15338	7.35799	7.99063	7.53126	7.85236
ogre	FBgn0004646	0.806706	0.349481	1.23479	1.98997	1.5637	2.71104
N	FBgn0004647	8.54031	9.99819	6.32982	5.49305	7.09555	6.08504
svr	FBgn0004648	56.4451	59.936	52.765	55.9904	51.7939	41.0081
fru	FBgn0004652	7.22643	6.3122	7.56091	3.32546	7.84304	9.67819
Pgd	FBgn0004654	2.64297	3.19715	3.47344	3.71953	2.57852	2.90925
wapl	FBgn0004655	8.72495	8.15945	5.33496	5.63606	7.42393	8.89009
fs(1)h	FBgn0004656	34.0068	37.266	23.0897	26.4427	38.4803	32.9351
mys	FBgn0004657	118.557	105.438	80.3887	84.215	101.934	87.5248
Mlc-c	FBgn0004687	314.627	255.608	195.151	190.321	207.588	197.835
Xpc	FBgn0004698	10.828	9.92092	9.21349	8.60834	9.52276	9.14914
mdy	FBgn0004797	3.83257	3.84052	3.72493	3.4459	2.60721	4.67705
fs(2)ltoPP43	FBgn0004811	14.0419	10.1222	17.3942	19.2219	11.3858	17.5112
His3,3B	FBgn0004828	559.137	682.813	441.215	517.944	702.484	528.188
Xpac	FBgn0004832	3.18872	1.40267	1.5791	2.28581	2.61502	2.63249
Su(H)	FBgn0004837	3.98323	5.18109	2.91032	3.83903	4.35698	3.09524
Hrb27C	FBgn0004838	431.842	481.103	197.229	276.574	429.49	340.283
RpII15	FBgn0004855	7.25858	6.785	3.31804	5.05023	5.74738	7.74021
Bx42	FBgn0004856	8.97825	9.34015	6.66922	6.6574	6.6307	5.52048
elB	FBgn0004858	2.83793	2.23559	1.24763	5.47662	10.3158	7.48489
ci	FBgn0004859	27.6795	27.9972	12.1289	27.1884	26.6922	21.9659
ph-d	FBgn0004860	6.58771	4.38306	5.83948	5.70123	6.27702	7.73385
ph-p	FBgn0004861	8.5729	6.8178	7.25114	7.47464	8.60649	7.5672
hop	FBgn0004864	19.9491	21.9823	16.8425	16.3094	16.958	17.7565
Eip78C	FBgn0004865	10.5852	7.21508	7.4004	10.2533	5.09614	6.91707
RpS2	FBgn0004867	842.524	1320.76	2245.62	1629.83	1668.37	1340.25
Gdi	FBgn0004868	174.493	135.603	150.299	152.472	122.024	138.012
enc	FBgn0004875	8.44278	8.8473	5.38683	6.45255	8.34968	7.13245
cdi	FBgn0004876	6.58241	6.37206	5.54734	7.01436	6.6573	6.79783
Scsalpha	FBgn0004888	35.2311	40.6849	81.3652	91.1914	57.1698	59.5823
tws	FBgn0004889	47.1584	46.8421	38.4667	39.9506	42.372	42.0744
Prat	FBgn0004901	2.47081	1.50451	3.05894	4.17617	2.9773	4.6242
Rb97D	FBgn0004903	16.209	20.449	17.9408	15.714	21.4969	23.1212
14-3-3zeta	FBgn0004907	420.537	342.781	316.082	302.96	372.733	407.944
Arl2	FBgn0004908	19.6743	4.61784	5.0169	7.00215	7.12477	6.303
Gnf1	FBgn0004913	2.47114	3.28047	4.45792	3.89452	3.21202	4.39388
Hnf4	FBgn0004914	8.7055	7.29835	5.48199	7.48223	8.23793	6.90474
TfIIB	FBgn0004915	14.4714	12.3617	13.5597	11.998	15.8938	17.0241
gol	FBgn0004919	0.927004	1.09335	1.99693	4.47816	2.35144	2.57014
Ggamma1	FBgn0004921	280.75	300.567	150.315	129.205	240.986	176.507
Top1	FBgn0004924	57.6354	55.1443	23.9934	32.1982	50.7835	47.1915
eIF-2beta	FBgn0004926	49.2679	39.1847	60.8896	47.3215	44.9191	68.5004
gig	FBgn0005198	3.60665	4.60965	3.7285	3.10227	3.29945	3.98374
Sam-S	FBgn0005278	24.5187	30.4099	46.0752	36.4941	41.039	56.3462
nmd	FBgn0005322	5.54698	5.60715	9.40619	9.67499	7.90963	6.06345
Su(fu)	FBgn0005355	3.31915	3.01964	4.75175	3.42392	1.5308	2.32084
ash1	FBgn0005386	5.21104	4.73752	5.26137	4.18084	5.0078	7.11526
U2af50	FBgn0005411	7.43141	6.60872	9.99722	8.75687	6.64706	6.59403
ewg	FBgn0005427	5.1245	4.00863	4.30934	4.38404	4.49391	3.5331
RpS17	FBgn0005533	584.196	1099.51	448.796	282.592	537.473	1055.91
Mbs	FBgn0005536	12.7359	12.2738	9.72656	9.63931	12.2886	10.1199
Calr	FBgn0005585	420.757	617.044	274.748	282.36	420.842	448.324
RpL7	FBgn0005593	334.918	395.27	503.085	474.162	366.004	529.099
yem	FBgn0005596	1.56777	1.49422	1.65403	1.71883	1.97964	2.43853
Sox14	FBgn0005612	30.3022	27.4314	19.7104	17.4149	20.0635	24.3332
msl-2	FBgn0005616	5.66416	2.86642	3.5	2.43175	2.48768	2.57773
msl-1	FBgn0005617	8.38279	9.10475	9.0055	8.31242	8.9278	7.65164
Psc	FBgn0005624	14.709	18.6798	10.96	10.3561	22.8653	13.7537
lola	FBgn0005630	25.8098	25.2908	25.4246	22.5733	28.2162	29.0907
robo1	FBgn0005631	11.7009	11.5169	9.06037	10.4025	9.05664	8.21961
faf	FBgn0005632	16.0894	15.0326	14.9803	13.7809	13.4805	14.1926
Eip63E	FBgn0005640	5.56347	7.53286	3.9796	4.29628	5.85984	3.38298
wdn	FBgn0005642	3.62999	3.2867	5.03334	4.67619	4.07014	3.16536
Pabp2	FBgn0005648	51.6717	45.8556	40.0225	41.932	56.2917	76.9951
Rox8	FBgn0005649	39.8473	32.9302	28.0829	28.183	28.45	33.5542
PCNA	FBgn0005655	53.6488	62.0274	66.8648	64.7637	73.6618	98.0559
Ets21C	FBgn0005660	1.90601	4.71124	1.77308	1.65512	1.66988	1.14706
bt	FBgn0005666	7.52816	7.95144	12.9562	9.83352	7.80974	16.9429
Vha55	FBgn0005671	165.147	187.762	182.895	125.077	134.438	128.624
spi	FBgn0005672	28.2533	25.9932	23.7041	21.7497	15.5507	18.4893
GluProRS	FBgn0005674	12.6996	9.89853	18.6047	15.5692	13.9281	17.6294
Aef1	FBgn0005694	22.9071	27.0443	17.6051	16.4837	23.9116	30.5266
gcl	FBgn0005695	4.1843	5.98199	4.7906	6.47084	4.14904	3.33028
DNApol-alpha73	FBgn0005696	2.47083	2.26605	0.900376	1.57167	1.3368	1.75117
noc	FBgn0005771	1.68443	0.577946	1.90187	3.241	2.82372	2.95272
PpD3	FBgn0005777	46.4496	42.5325	42.8873	38.0043	37.0027	51.1902
betaCOP	FBgn0008635	11.3666	13.5847	17.2888	25.9868	16.383	16.1632
GstD3	FBgn0010039	4.51884	1.47663	17.0711	7.74981	9.11304	22.6322
GstD4	FBgn0010040	1.32849	0.7597	2.56576	4.69719	4.6885	9.74285
GstD5	FBgn0010041	0	0	0	2.16848	1.7704	2.35862
Itp-r83A	FBgn0010051	7.6262	7.90374	8.62893	9.24511	10.1073	10.1642
Jheh1	FBgn0010053	5.70376	6.76432	5.58496	3.67737	2.57339	2.55061
RpL23	FBgn0010078	157.624	218.992	301.493	256.001	161.884	208.836
Acon	FBgn0010100	19.8964	22.5425	30.9422	29.1468	23.9971	32.5354
comm	FBgn0010105	4.28499	5.29811	3.72781	1.90453	0.979218	0.552407
hdc	FBgn0010113	78.5719	96.642	47.2029	42.8818	87.1201	73.0394
RpA-70	FBgn0010173	7.35338	7.02989	9.65107	8.01241	8.65712	10.6113
Wnt5	FBgn0010194	2.83777	3.26619	3.07261	2.47181	3.23578	4.68882
RpS15Aa	FBgn0010198	1182.83	1081.73	864.607	709.079	1093.86	1496.61
Sod2	FBgn0010213	12.7156	16.2793	20.5825	11.0017	18.7331	19.4348
alpha-Cat	FBgn0010215	76.9532	66.4588	58.6807	49.8301	55.1986	47.7271
ATPsynbeta	FBgn0010217	332.059	288.607	300.334	233.043	363.815	313.805
Dbp45A	FBgn0010220	1.73022	2.96829	4.36983	4.97944	2.60789	7.42773
Nmdmc	FBgn0010222	13.469	10.6269	11.7984	8.72418	14.0137	10.0574
Gel	FBgn0010225	86.1156	65.0765	60.8766	32.7536	30.6129	23.1212
GstS1	FBgn0010226	5.46142	5.9315	6.03811	6.02243	6.02324	8.82236
HmgZ	FBgn0010228	256.101	239.851	150.852	148.124	214.037	219.38
Klc	FBgn0010235	32.2763	28.2726	29.5189	23.4714	25.4114	25.3209
Lac	FBgn0010238	2.94844	3.95971	1.59284	1.91013	0.985379	1.11871
Myo61F	FBgn0010246	11.7625	14.1003	15.702	9.1712	11.361	6.25094
Parp	FBgn0010247	46.1152	59.2905	64.6482	68.1519	70.0422	79.6362
RpS13	FBgn0010265	225.415	239.397	199.435	182.619	152.069	275.766
Dsor1	FBgn0010269	10.3865	9.03173	7.5562	6.73546	5.43224	7.56547
Ssrp	FBgn0010278	23.4738	21.3107	22.8306	15.574	25.7615	32.436
Taf4	FBgn0010280	37.8034	39.766	27.0565	23.5896	35.7225	36.1836
TfIIFalpha	FBgn0010282	17.0963	17.0521	12.9948	14.9567	16.4981	18.4905
Trf	FBgn0010287	2.84146	0.420231	3.49356	2.90039	3.24183	4.64443
Uch	FBgn0010288	47.1915	42.5981	68.0757	51.9149	28.954	43.8628
bys	FBgn0010292	1.84002	3.26551	6.88117	3.80854	3.70874	1.75914
brat	FBgn0010300	66.5654	55.2914	48.4055	77.215	74.5345	77.1079
hep	FBgn0010303	24.3928	19.1422	16.669	16.0432	15.6217	15.7452
corto	FBgn0010313	10.9228	13.2006	6.29697	8.42754	13.7952	13.328
Cks30A	FBgn0010314	5.54215	9.48383	13.8475	12.4284	9.81668	13.368
CycD	FBgn0010315	11.3082	9.0375	10.8499	11.8811	15.4594	10.6052
dap	FBgn0010316	8.18494	9.03457	10.4066	9.86046	11.4621	8.85244
woc	FBgn0010328	13.4769	14.5263	10.8018	11.2316	13.7561	13.4952
Rac1	FBgn0010333	53.3072	65.2242	43.601	48.2639	54.2007	50.4915
128up	FBgn0010339	11.3009	7.91961	13.8262	10.7499	13.1151	16.9772
140up	FBgn0010340	3.85263	4.13087	3.69651	3.49786	4.24895	4.01991
Cdc42	FBgn0010341	278.611	290.698	176.625	187.587	212.959	157.939
Map60	FBgn0010342	6.15911	5.76894	6.46826	6.59245	5.62155	6.69564
Arf79F	FBgn0010348	514.986	434.006	323.507	331.576	451.212	564.749
CdsA	FBgn0010350	9.0446	9.9221	10.5851	8.49946	8.50931	14.9897
Nc73EF	FBgn0010352	17.4841	22.0292	16.3249	16.2459	22.0885	20.6074
Taf1	FBgn0010355	7.11582	6.08776	7.49165	6.65732	5.80864	5.48717
Taf5	FBgn0010356	3.2214	1.39911	4.24062	2.44766	3.50782	2.62581
Akt1	FBgn0010379	34.2986	35.2055	28.4484	25.8697	35.828	33.4239
AP-1-2beta	FBgn0010380	14.9188	13.1809	14.0963	12.9541	9.93792	11.0745
Drs	FBgn0010381	10.9506	12.8089	1.84872	4.2975	3.01928	6.23243
CycE	FBgn0010382	6.79382	10.2856	7.9668	9.33665	11.9126	12.0328
Dro	FBgn0010388	4.59863	22.8275	3.0364	2.10071	13.6654	0.571227
Gtp-bp	FBgn0010391	6.98008	4.42019	6.68127	7.89656	8.9381	7.41584
LamC	FBgn0010397	4.16713	4.32758	5.3732	3.87902	4.94266	3.55112
Lrr47	FBgn0010398	1.64467	1.68997	2.29067	2.57791	1.30371	1.65479
RNaseX25	FBgn0010406	18.823	19.7063	20.1342	18.9539	17.9488	23.1022
RpS9	FBgn0010408	105.399	154.197	128.051	114.516	117.702	165.343
RpL18A	FBgn0010409	227.669	226.601	347.473	257.171	175.98	273.481
RpS18	FBgn0010411	1460.47	1584.62	965.16	702.159	1122.81	1321.67
RpS19a	FBgn0010412	228.961	254.528	244.418	177.214	223.714	305.066
Sdc	FBgn0010415	45.6824	32.7363	13.9958	26.0659	32.5093	23.5545
TH1	FBgn0010416	20.8398	31.0519	26.0391	25.7553	30.3365	29.8137
Taf6	FBgn0010417	5.62154	5.42478	6.0549	6.27873	3.25491	4.48302
TfIIFbeta	FBgn0010421	17.7469	14.0405	20.3501	14.876	16.4371	17.7213
TfIIS	FBgn0010422	16.8403	19.2603	24.4537	20.8154	17.5542	26.5759
TpnC73F	FBgn0010424	94.3149	130.934	73.7747	77.2523	111.54	171.794
cora	FBgn0010434	35.2717	42.9288	28.0593	16.8144	32.1853	19.3008
emp	FBgn0010435	3.77387	3.12767	2.6408	4.09251	3.31761	3.05725
pll	FBgn0010441	15.7118	11.6945	11.8563	10.2123	9.51669	8.20816
Fkbp14	FBgn0010470	149.396	175.485	214.318	232.134	166.476	185.347
tutl	FBgn0010473	3.25338	2.36734	2.21408	5.35026	4.3508	3.71988
NAT1	FBgn0010488	139.977	99.5346	80.9289	86.0469	94.9358	85.472
dmGlut	FBgn0010497	2.97761	3.17846	3.77485	5.35378	4.42235	5.21959
Dcp-1	FBgn0010501	5.01128	6.1408	6.3814	6.52049	6.92368	8.47127
kermit	FBgn0010504	1.90217	1.51659	2.7716	2.73714	1.61373	2.61727
wal	FBgn0010516	11.9556	13.6911	23.9239	23.5233	22.8728	21.658
Bka	FBgn0010520	3.6849	7.99288	3.5867	5.5375	7.5674	8.18226
Ccs	FBgn0010531	1.57733	4.79186	1.17167	2.5129	1.30469	2.82141
Aldh-III	FBgn0010548	23.831	21.0395	26.4039	20.1463	20.7836	21.6491
Phb2	FBgn0010551	25.8508	34.0412	45.3739	27.3772	30.7031	46.8326
sbb	FBgn0010575	10.0687	7.05134	9.50063	10.5936	10.0728	11.7278
dock	FBgn0010583	10.1602	10.0276	7.66215	7.73944	8.30452	5.16616
Prosbeta1	FBgn0010590	17.5222	20.525	23.1766	20.7287	21.943	21.9397
Sply	FBgn0010591	49.2488	33.103	23.9477	18.3072	16.1079	14.6157
lwr	FBgn0010602	7.079	9.89872	11.131	11.8115	8.32011	12.1078
l(2)05714	FBgn0010607	10.1188	9.96552	9.46514	6.10154	8.10112	10.1894
Hmgs	FBgn0010611	9.20083	7.38975	7.73047	9.69062	5.51072	9.46164
ATPsynG	FBgn0010612	9.39964	8.37692	9.79327	9.83686	8.34712	6.769
Cct5	FBgn0010621	53.4817	58.8734	98.0904	87.5522	73.783	71.7045
DCTN3-p24	FBgn0010622	8.69631	4.57421	3.90025	5.19433	4.70498	3.81545
Sec61beta	FBgn0010638	84.7627	100.142	126.83	132.095	137.206	197.08
MFS14	FBgn0010651	10.8092	8.75255	8.09454	9.85142	5.26596	7.41421
Nup214	FBgn0010660	13.6511	10.0161	18.2686	14.9812	14.0995	14.486
l(3)01239	FBgn0010741	62.6586	59.3492	57.3515	49.5279	56.3746	69.2251
Srp54k	FBgn0010747	7.07431	8.95192	9.65773	13.206	11.5449	15.6892
atms	FBgn0010750	8.82895	7.35726	7.78581	6.32797	6.3526	5.95386
simj	FBgn0010762	34.5941	41.2765	22.3805	21.9357	33.0424	20.8222
sqz	FBgn0010768	1.8329	2.40904	2.72303	2.40653	2.34749	2.03587
ppan	FBgn0010770	9.52072	9.22943	11.0442	10.5095	11.0036	16.68
Xe7	FBgn0010772	12.7455	11.1399	10.5435	9.26542	10.223	9.37836
Ref1	FBgn0010774	38.3667	25.4032	43.8538	42.5205	30.4754	36.2597
l(3)02640	FBgn0010786	2.18557	2.2626	3.135	3.78013	3.44937	4.28009
TrpRS	FBgn0010803	5.83732	4.41804	10.4576	8.04673	8.64686	10.7484
l(3)03670	FBgn0010808	15.2671	7.6172	11.8735	9.60471	7.45827	11.5466
unc-45	FBgn0010812	5.65513	4.68063	4.11231	3.20605	4.69407	2.76844
Gug	FBgn0010825	13.6845	11.6165	11.3252	11.7372	12.1774	11.9459
l(3)05822	FBgn0010877	16.8573	21.4869	17.9927	15.3863	15.8238	15.0033
sinu	FBgn0010894	10.5877	12.1359	13.9279	11.6206	7.8189	9.38583
Spn	FBgn0010905	4.35325	4.23844	2.96886	2.83121	3.37317	3.26406
msn	FBgn0010909	114.457	91.2866	68.5612	80.4601	83.8225	75.6523
l(3)07882	FBgn0010926	1.36159	1.56363	1.85703	1.83538	1.87092	2.59521
SsRbeta	FBgn0011016	83.4399	104.794	111.912	143.888	119.53	148.253
Sas-4	FBgn0011020	1.64995	2.30967	2.75763	2.0633	2.46415	2.49016
dia	FBgn0011202	2.15055	2.86951	2.49205	1.7801	2.51408	1.52587
cue	FBgn0011204	8.80287	9.0945	11.1877	7.20998	11.5667	17.2528
fbl	FBgn0011205	1.01443	2.43015	2.19951	1.87114	1.30021	1.32411
bol	FBgn0011206	1.33232	2.41039	1.87424	0.979174	2.01551	0.748686
pelo	FBgn0011207	15.9192	14.0052	17.0729	16.6139	19.6345	23.7151
blw	FBgn0011211	363.109	392.359	286.626	243.322	338.907	387.749
eff	FBgn0011217	226.859	214.399	135.078	118.278	171.524	177.976
heph	FBgn0011224	23.5068	25.7554	18.1461	18.6949	22.91	19.7371
ox	FBgn0011227	1.45492	4.15999	1.29689	0.239265	2.24643	1.82171
poe	FBgn0011230	32.1033	27.3166	41.0141	34.1529	27.6172	33.2803
scat	FBgn0011232	1.29937	1.04491	1.97061	1.44682	2.05999	2.37263
ken	FBgn0011236	3.23144	2.3323	1.67794	1.18666	2.24904	1.68354
cbx	FBgn0011241	1.56484	2.46085	1.74359	1.60838	1.38065	1.11962
Sema-1a	FBgn0011259	3.66737	4.06736	2.63994	4.00258	4.10718	3.60119
Sema-2a	FBgn0011260	24.5465	26.8393	21.3727	28.6141	33.0565	32.3416
RpL13	FBgn0011272	419.37	453.491	544.767	444.897	423.394	402.564
Dif	FBgn0011274	9.06501	6.64904	13.2663	6.57771	9.17685	7.74437
RpS4	FBgn0011284	96.4487	119.165	176.172	136.804	119.273	195.229
TfIIA-L	FBgn0011289	8.84114	10.7143	12.8738	9.05106	7.49056	16.4951
Taf12	FBgn0011290	11.8639	12.1627	8.11697	6.93132	8.95242	9.07482
Taf11	FBgn0011291	6.94168	8.32908	7.18215	4.2809	11.0735	9.53427
l(2)not	FBgn0011297	5.48276	5.89893	6.54992	7.48279	8.10393	8.9983
babo	FBgn0011300	38.7298	42.604	29.7767	35.6409	46.682	44.9322
Rsf1	FBgn0011305	28.1833	13.0654	22.114	24.479	14.4247	14.9768
Uch-L5	FBgn0011327	29.6409	23.509	26.5857	30.622	27.9657	28.7961
l(3)j2D3	FBgn0011335	10.1217	7.6447	10.214	5.49614	8.14406	10.1912
OstStt3	FBgn0011336	61.6806	67.8035	88.6706	93.8172	82.0946	87.4476
ND-ACP	FBgn0011361	24.7081	32.5433	18.5236	20.1284	28.5114	30.0777
ND-SGDH	FBgn0011455	9.32788	6.35757	14.9858	10.5239	13.8761	12.5137
PR-Set7	FBgn0011474	21.1144	17.1502	16.5565	16.1498	17.4712	17.4424
l(3)neo43	FBgn0011476	2.61143	1.97649	1.5975	1.38942	2.03299	0.824316
Ssdp	FBgn0011481	29.0465	27.2099	27.3948	30.884	33.112	32.9679
SrpRbeta	FBgn0011509	14.1716	15.65	19.6671	18.0024	24.614	37.7199
cpb	FBgn0011570	42.2069	42.2524	36.107	37.4601	26.1423	26.8352
caz	FBgn0011571	33.8782	37.7712	19.9262	24.957	37.2357	39.5546
Cdc37	FBgn0011573	7.89179	9.40193	8.79328	9.43872	10.4839	5.29358
Trp1	FBgn0011584	14.9233	15.791	11.4053	13.9134	19.8711	19.4071
e(r)	FBgn0011586	48.3006	35.1789	29.4324	24.9749	32.6794	33.2411
Elk	FBgn0011589	3.40192	3.55111	1.1766	0.177604	0.416876	0.177079
fra	FBgn0011592	8.53431	7.84342	7.51678	8.64648	10.7905	10.9584
fzo	FBgn0011596	2.86007	3.34017	3.11197	3.21292	1.37722	4.25121
Iswi	FBgn0011604	12.1748	10.0808	9.88726	8.40393	13.8059	16.3921
Klp3A	FBgn0011606	2.97862	2.34207	3.8246	3.079	3.12078	2.83521
La	FBgn0011638	18.9647	23.1122	39.1675	36.6074	29.5562	35.424
lark	FBgn0011640	34.6245	29.7754	29.767	30.7465	30.3843	36.1148
Zyx	FBgn0011642	48.0971	47.5012	55.2617	48.1444	58.184	51.931
Mad	FBgn0011648	6.77485	7.62734	11.0715	12.9287	7.78311	9.89662
Med	FBgn0011655	2.3622	1.84934	1.29513	1.91922	0.8684	0.930575
Mef2	FBgn0011656	17.1813	16.6799	12.9261	16.0755	17.1221	19.5664
Pms2	FBgn0011660	2.43958	2.62709	3.90675	2.21438	2.86525	2.77691
Moe	FBgn0011661	737.223	726.814	281.598	242.785	482.272	266.739
msi	FBgn0011666	35.4107	40.9255	25.6319	25.343	34.3519	23.745
Mvl	FBgn0011672	30.2063	33.0401	24.427	19.2838	17.588	8.31359
pav	FBgn0011692	4.32475	3.77836	6.64811	4.4204	6.52513	6.36589
RnrL	FBgn0011703	9.26904	9.35069	17.3796	11.4324	11.8301	13.8387
RnrS	FBgn0011704	26.18	29.3889	32.4267	23.416	30.9403	36.0678
rost	FBgn0011705	6.57091	5.85062	5.05227	6.35091	6.54761	4.6911
rpr	FBgn0011706	0.320696	1.06978	0.476439	2.19747	1.65054	1.72091
Syx5	FBgn0011708	19.7186	19.9033	14.7627	17.065	17.7515	15.9692
Sep1	FBgn0011710	54.9085	48.2546	49.7921	38.5038	39.0606	40.9446
Snr1	FBgn0011715	5.98817	6.18857	7.61006	5.93234	5.64936	6.32346
Tig	FBgn0011722	30.6871	30.078	25.7106	6.22921	10.0805	1.52201
twin	FBgn0011725	11.522	12.3323	8.7557	9.42379	10.5482	10.1042
tsr	FBgn0011726	1649.16	1624.06	943.23	641.332	1180.46	1164.25
Wee1	FBgn0011737	5.04822	5.03638	3.18339	5.4948	5.00678	3.11823
wts	FBgn0011739	19.054	17.7013	10.6769	11.8188	13.326	11.2074
alpha-Man-IIa	FBgn0011740	2.59923	3.30304	4.1118	3.46313	3.58326	2.32465
Arp6	FBgn0011741	6.14934	7.97346	6.37374	4.52721	4.41614	6.45898
Arp2	FBgn0011742	80.7867	72.2536	59.6167	51.7434	60.9162	41.5712
Arp1	FBgn0011745	14.5555	21.3714	18.7995	16.4971	11.2804	12.4902
Ank	FBgn0011747	62.1592	60.6577	74.3134	66.6097	51.5516	57.3766
PhKgamma	FBgn0011754	11.1493	11.1408	6.6342	8.71164	9.56015	8.01373
ctp	FBgn0011760	71.9932	61.926	35.4877	40.2377	59.6409	59.696
DNApol-alpha50	FBgn0011762	1.04357	0.4388	2.00637	1.21142	1.69254	3.0196
Dp	FBgn0011763	19.0343	20.6673	20.8506	26.9685	26.0411	24.5386
Dsp1	FBgn0011764	43.5006	42.0453	31.1207	39.4354	53.1994	44.1517
E2f1	FBgn0011766	51.0021	47.6417	27.6599	31.7843	49.2177	48.4184
Fdh	FBgn0011768	18.1538	16.1692	22.689	24.8786	14.857	14.2387
Fdx1	FBgn0011769	3.3795	1.85824	3.47588	1.81693	2.58034	2.55749
Gip	FBgn0011770	8.41312	8.01842	5.45928	4.61186	4.05272	3.45948
Hem	FBgn0011771	16.9834	14.1086	18.715	12.6857	10.1246	12.8174
Irbp	FBgn0011774	4.0337	4.16483	5.92604	3.16934	3.50949	2.2848
BRWD3	FBgn0011785	9.94536	9.0099	7.3086	7.71851	9.01818	7.65804
mRpL12	FBgn0011787	1.95764	3.73159	5.6228	3.54132	3.45443	5.01906
Gem3	FBgn0011802	5.27391	4.8296	5.01882	4.89609	4.87831	6.49916
nmo	FBgn0011817	36.4461	29.1252	23.7763	19.3972	20.2965	14.4747
oaf	FBgn0011818	6.00666	5.63941	5.06122	8.03516	11.2717	9.48807
CG4038	FBgn0011824	12.2785	13.8127	16.2977	12.9926	25.6402	19.1725
Pp2B-14D	FBgn0011826	21.8006	23.6816	11.1234	12.3864	18.1507	10.7397
Pxn	FBgn0011828	402.86	383.628	258.068	89.477	139.58	38.796
Taf2	FBgn0011836	5.45595	4.33332	6.16024	5.46322	5.77652	6.24587
Tis11	FBgn0011837	168.346	210.791	97.7838	116.985	204.559	130.097
tRNA:Gly-GCC-1-1	FBgn0011859	81.3936	46.545	16.1229	6.69268	38.8989	38.8241
tRNA:Ile-AAT-1-7	FBgn0011885	0	0	1.93366	5.35113	2.87092	4.65627
AcCoAS	FBgn0012034	9.48463	7.67734	5.55692	3.82253	3.1823	4.08602
Aldh	FBgn0012036	28.2898	38.8475	57.0289	19.7035	33.2527	29.213
Ance	FBgn0012037	125.171	73.3578	173.439	161.55	78.5366	125.285
AttA	FBgn0012042	3.9014	11.678	3.07916	2.10523	8.33656	2.07175
CalpA	FBgn0012051	3.41585	2.92203	3.82684	5.31815	3.39669	2.27873
Cdc27	FBgn0012058	12.2437	11.7559	10.6364	11.39	10.8999	8.53754
Trl	FBgn0013263	6.79169	11.8673	4.69037	6.04043	7.64323	8.66369
FK506-bp1	FBgn0013269	59.7617	91.5851	95.9445	66.9423	124.541	184.948
Gp150	FBgn0013272	15.1644	9.8314	9.57624	16.3194	26.2535	21.9733
Hsp70Aa	FBgn0013275	27.0105	19.8855	22.0463	20.6803	13.6905	17.1052
Hsp70Ab	FBgn0013276	25.3463	20.8138	21.0268	19.274	14.4464	15.1971
Hsp70Ba	FBgn0013277	4.47595	2.84397	1.4777	1.73797	1.73688	1.59383
Hsp70Bb	FBgn0013278	5.37595	3.16811	1.76806	1.68719	1.99141	1.79843
Hsp70Bc	FBgn0013279	5.48992	3.92427	2.93857	2.22388	2.0479	2.56329
Nca	FBgn0013303	10.3922	9.34308	15.7575	14.7117	17.6055	20.7927
Nmda1	FBgn0013305	85.5314	75.1744	75.4126	64.2747	56.352	48.3587
RpL11	FBgn0013325	125.296	207.694	315.306	255.112	168.475	286.29
Sap47	FBgn0013334	14.1291	13.1866	10.0595	13.0407	17.8561	11.5868
Syx1A	FBgn0013343	68.1556	65.3471	42.6948	32.9427	56.0001	65.3662
TfIIA-S	FBgn0013347	196.534	155.549	65.1677	50.0595	103.641	114.343
bcn92	FBgn0013432	8.75598	11.9655	6.88671	5.71741	4.68635	8.52197
Cdc2rk	FBgn0013435	1.38584	1.32082	1.48695	1.70928	1.78313	1.44601
MED20	FBgn0013531	2.41486	2.52287	3.7256	1.75653	1.22921	0.66454
mtd	FBgn0013576	14.8966	14.9643	7.8943	8.89317	9.77751	7.16285
not	FBgn0013717	3.31901	3.91573	4.30852	5.14024	4.12244	5.01457
nuf	FBgn0013718	14.4629	12.0613	6.13903	7.50344	9.28557	7.65322
pck	FBgn0013720	6.06046	8.94369	6.97058	3.85803	4.95903	2.21472
pnut	FBgn0013726	61.9514	71.6909	41.4098	41.3906	45.1987	49.8861
sced	FBgn0013732	3.97058	4.42429	3.20967	4.53719	3.92825	5.66614
shot	FBgn0013733	13.2975	12.5227	15.2199	12.8349	13.7189	17.6196
alien	FBgn0013746	8.69373	6.42721	10.8368	8.56843	8.37313	6.92324
Arf102F	FBgn0013749	15.5348	30.5003	42.6195	38.6616	35.7506	44.4599
Arf51F	FBgn0013750	91.5789	83.9592	59.2953	51.9683	56.111	42.3644
Mtor	FBgn0013756	40.9652	33.6275	27.8824	26.5075	37.9566	32.5631
CASK	FBgn0013759	5.81021	5.45666	4.2907	3.95797	4.72162	5.80419
Cdk5	FBgn0013762	6.06477	10.3014	9.18848	10.1218	9.20519	8.00188
Idgf6	FBgn0013763	821.263	769.909	1019.41	503.562	560.74	544.957
Chi	FBgn0013764	5.14599	4.23019	5.98865	6.31176	6.05372	4.71743
cnn	FBgn0013765	4.63236	4.33354	3.8567	3.92405	3.75452	5.1579
Cp1	FBgn0013770	89.183	85.3766	51.1829	43.2784	64.269	50.242
Deaf1	FBgn0013799	14.8459	14.41	9.36396	11.3719	12.7538	12.1827
FK506-bp2	FBgn0013954	134.659	123.121	101.045	97.5884	110.587	97.1638
His4r	FBgn0013981	1227.54	1150.17	538.028	380.761	568.218	581.56
imd	FBgn0013983	6.34491	3.62834	4.33608	3.18248	3.56879	2.21311
InR	FBgn0013984	28.0042	19.8785	17.0319	16.7493	18.8768	19.1728
MAPk-Ak2	FBgn0013987	61.742	66.0914	63.0171	48.2819	65.5804	53.4952
Nrx-IV	FBgn0013997	14.4933	15.9756	14.7074	14.5382	11.2903	8.9042
Pdi	FBgn0014002	1327.36	1341.41	1179.08	1230.68	1355.45	1470.87
Ask1	FBgn0014006	2.75827	2.69103	4.78999	4.39812	4.52191	3.4003
Ptp69D	FBgn0014007	27.7318	25.4449	29.2106	25.316	23.1234	24.4022
Rab2	FBgn0014009	93.8966	84.049	81.6586	65.5964	72.9048	69.4864
Rab5	FBgn0014010	97.8771	97.0347	73.0917	70.1845	78.503	63.7706
Rac2	FBgn0014011	37.7095	41.8926	26.9804	23.8014	30.6558	26.1012
Rel	FBgn0014018	125.466	124.749	110.252	89.699	123.801	81.3157
Rho1	FBgn0014020	1063.67	879.924	438.391	360.154	610.487	577.669
Rlb1	FBgn0014022	4.66905	5.91214	6.14378	3.89402	3.82524	4.53374
mRpL47	FBgn0014023	5.95987	3.49945	8.22178	7.00082	9.15521	6.28211
Rnp4F	FBgn0014024	2.95643	3.64647	4.95198	3.36044	4.53921	3.91432
RpL7A	FBgn0014026	64.0884	83.5598	105.332	102.323	66.8847	97.6702
SdhB	FBgn0014028	2.13333	2.37211	3.16936	2.40384	1.13282	1.97863
Sep2	FBgn0014029	18.7724	19.7407	24.4983	18.0632	10.3833	15.1563
Sptr	FBgn0014032	0.674126	1.56609	1.25189	1.45506	2.60216	1.80874
Sr-CI	FBgn0014033	96.1845	94.4859	46.6571	6.04226	22.335	6.72854
Su(Tpl)	FBgn0014037	78.8144	67.3931	36.0642	41.3673	68.5501	57.696
Ugt	FBgn0014075	31.6161	31.5229	39.7564	38.8833	32.4307	38.5172
CG4278	FBgn0014092	7.88285	11.6581	12.3841	12.144	7.49463	11.5881
barr	FBgn0014127	4.9019	5.44532	7.08564	6.69959	4.96783	9.59756
bif	FBgn0014133	17.6793	17.6752	12.3639	14.3668	15.1851	13.9022
cher	FBgn0014141	22.9552	25.2374	30.2026	19.9588	20.5395	17.8623
fax	FBgn0014163	1130.83	794.55	172.244	472.9	570.504	379.872
Oda	FBgn0014184	233.758	251.738	202.551	186.671	255.806	193.738
Hel25E	FBgn0014189	47.3357	58.8285	64.2163	64.452	51.7733	61.2442
prod	FBgn0014269	2.65366	3.27641	4.21118	6.5956	2.92664	4.15332
mof	FBgn0014340	2.90801	2.51269	3.22832	2.65391	2.64326	2.48649
noi	FBgn0014366	2.64234	2.4443	4.9262	3.66375	2.9713	3.56797
RhoL	FBgn0014380	42.5645	31.6934	25.2334	25.6324	24.5248	12.5063
sty	FBgn0014388	121.573	102.272	47.653	46.2102	57.8781	38.9995
sun	FBgn0014391	5.99298	6.1198	6.99554	4.57581	5.90133	4.97704
Vps26	FBgn0014411	35.1857	32.6506	25.0394	27.3124	25.0209	26.8619
CG11899	FBgn0014427	2.53894	4.68352	1.82513	5.58957	4.7873	3.73571
Ahcy13	FBgn0014455	19.954	27.0323	42.4747	41.8969	34.4388	31.627
Cyp4e2	FBgn0014469	79.967	61.3351	58.9108	50.0146	40.4289	32.2404
His3,3A	FBgn0014857	14.2263	12.9176	9.42513	6.63925	8.58696	8.08109
Mcm2	FBgn0014861	0.564999	0.997794	1.53064	1.20243	1.31955	1.42677
Mlp84B	FBgn0014863	5.71261	5.4885	11.179	6.51555	2.91303	13.7892
Ost48	FBgn0014868	23.2991	26.4834	42.0855	41.2996	31.5934	25.4495
Pglym78	FBgn0014869	4.23925	7.7575	13.7296	5.78638	6.54549	17.8197
Psi	FBgn0014870	18.6538	24.0544	11.9955	14.9764	18.0338	15.5781
Roe1	FBgn0014877	1.80875	3.62017	3.89636	5.50287	2.29404	17.4709
Set	FBgn0014879	78.3544	76.6808	57.2852	55.2819	75.4199	89.678
Hydr2	FBgn0014906	10.2485	11.9044	12.0703	12.6959	13.3477	15.2262
CG2846	FBgn0014930	7.40278	9.55903	10.2883	7.39606	5.79403	7.75981
CG2678	FBgn0014931	3.17366	2.54355	1.85739	1.85834	2.22736	3.09643
betaggt-I	FBgn0015000	3.61724	2.93298	5.05309	4.43928	4.10843	3.76626
Cctgamma	FBgn0015019	22.0659	27.0303	33.3768	30.2155	23.698	26.9763
CkIalpha	FBgn0015024	112.869	105.244	73.5203	68.4773	103.292	96.0106
cype	FBgn0015031	7.56503	9.49625	5.4824	5.46184	6.9188	5.94076
Ddx1	FBgn0015075	7.4479	4.57127	5.44555	6.57301	3.87051	6.94011
eIF-4E	FBgn0015218	99.16	92.2283	80.7966	59.8139	66.3008	75.3878
Fer2LCH	FBgn0015221	124.603	129.006	88.5633	97.6023	111.703	125.291
Fer1HCH	FBgn0015222	139.893	106.749	89.0703	100.229	91.0682	88.4613
glec	FBgn0015229	157.958	126.008	71.9641	72.3588	115.81	108.202
Hr78	FBgn0015239	4.93519	5.9744	6.2676	5.62886	4.38942	3.66633
Hr96	FBgn0015240	2.85481	3.93555	3.7868	3.99617	3.7482	2.55323
Hsp60A	FBgn0015245	43.9635	40.4758	32.9455	28.4533	43.8173	49.0101
Diap2	FBgn0015247	3.29478	4.25863	4.49253	5.641	2.78751	3.63294
Nf1	FBgn0015269	9.92443	9.71422	9.32705	8.35721	8.16944	7.10424
Orc5	FBgn0015271	0.0570929	0.571351	0.933015	1.40836	1.07042	1.17442
Pi3K68D	FBgn0015278	8.03969	6.14413	6.45825	6.34671	4.72621	3.12577
Pi3K92E	FBgn0015279	16.799	19.5204	17.7422	13.9932	14.4222	16.4485
Rpt2	FBgn0015282	17.5443	28.7254	30.7315	29.1444	17.4534	28.1482
Rpn10	FBgn0015283	18.2201	13.266	21.1315	12.3084	11.9521	18.1126
Rala	FBgn0015286	71.6329	70.7748	60.4403	66.5011	59.9271	46.1235
RpL22	FBgn0015288	54.9	49.5704	146.343	109.076	74.5498	82.5388
Shark	FBgn0015295	7.67251	4.7257	6.89322	7.18157	3.47836	3.30894
Shc	FBgn0015296	15.8921	13.5114	10.6424	11.7805	11.0871	6.56825
Srp19	FBgn0015298	13.2748	8.22378	14.4624	8.73226	14.315	10.0256
Ssb-c31a	FBgn0015299	24.9774	33.1394	13.8819	12.2637	16.2507	14.7854
Ubc2	FBgn0015320	25.6186	25.3746	21.7305	39.6335	28.3012	31.251
Ubc4	FBgn0015321	12.5678	13.5359	11.4707	9.08283	13.1148	8.66955
Vha26	FBgn0015324	195.66	195.626	167.738	140.042	144.052	135.394
abs	FBgn0015331	6.32449	8.8346	8.60695	7.66164	5.69722	8.29026
CG5861	FBgn0015338	6.92858	10.7613	13.7245	11.1832	8.20735	7.72668
CG14906	FBgn0015351	2.86411	3.86062	2.79616	2.35504	6.31748	0.805056
CG2034	FBgn0015359	7.05115	5.6837	12.37	8.94356	9.34836	7.91639
oxt	FBgn0015360	5.75615	4.56269	3.6831	3.74896	3.95982	3.61894
chn	FBgn0015371	11.2389	13.5142	6.01548	7.4057	10.2726	9.56969
RabX1	FBgn0015372	42.781	66.0905	29.1738	27.6804	55.7546	22.6329
cutlet	FBgn0015376	1.81559	2.17011	2.07826	1.86	2.16649	2.10295
dod	FBgn0015379	3.01871	3.10186	4.90516	5.35218	2.70502	1.85612
drl	FBgn0015380	3.69252	1.81879	2.58153	3.11276	1.91641	1.13782
glu	FBgn0015391	7.69077	7.73605	7.78595	5.48299	7.98852	7.98343
hoip	FBgn0015393	37.9233	34.9343	33.9457	24.2679	46.1995	56.6232
jumu	FBgn0015396	14.9963	13.1631	12.678	12.5976	16.0987	19.4152
kek1	FBgn0015399	30.7685	43.3213	11.2485	7.6898	20.4997	6.26561
ksr	FBgn0015402	2.21717	1.99667	1.55618	2.56955	1.7136	1.85804
Rme-8	FBgn0015477	11.8861	11.9073	17.9531	12.8207	9.22676	9.14507
Cul1	FBgn0015509	15.7696	14.2983	18.383	20.0048	13.3133	15.9759
mbc	FBgn0015513	10.8766	9.66544	15.2962	8.55091	9.39153	7.84674
nonA-l	FBgn0015520	18.1503	14.3472	14.9586	8.66044	4.96783	6.54648
RpS21	FBgn0015521	33.1729	49.0602	29.7397	31.3213	38.8562	44.1959
olf186-M	FBgn0015522	47.3304	57.4126	49.254	51.3463	66.6789	50.8163
peng	FBgn0015527	6.26643	5.64279	6.83111	7.49475	6.50717	8.47945
sda	FBgn0015541	1.07802	0.265719	0.717938	2.99548	2.02936	2.75944
snoRNA:Me28S-A1322	FBgn0015543	17.1521	18.8624	31.3623	22.7826	29.1024	22.4203
spag	FBgn0015544	5.17202	3.92338	3.60667	4.29615	3.84152	5.00326
tos	FBgn0015553	2.13587	1.67078	4.61003	2.18702	1.46669	3.53214
alpha-Est8	FBgn0015576	6.9525	5.77635	6.86791	6.67455	4.25538	4.32984
alpha-Est9	FBgn0015577	11.3739	10.8403	8.61443	2.45269	6.51793	2.24391
Apc	FBgn0015589	8.77554	10.1175	9.7233	8.51928	8.86656	11.3018
toc	FBgn0015600	1.92375	2.40799	1.40995	1.32873	1.53702	1.61347
BEAF-32	FBgn0015602	20.7287	15.2836	17.8211	20.5111	20.2595	21.8158
CanB2	FBgn0015614	54.3499	51.9114	56.2365	53.2205	47.3137	47.3128
SMC3	FBgn0015615	4.19285	3.63078	5.41039	4.72816	4.83556	4.77847
Clp	FBgn0015621	1.1595	3.64683	2.871	2.66955	1.70504	1.65922
Cnx99A	FBgn0015622	65.2673	68.971	52.7311	57.6904	70.4992	62.1325
Cpr	FBgn0015623	5.84692	7.16478	7.65945	8.43123	7.49666	6.77485
CycB3	FBgn0015625	6.74845	6.78209	5.21142	5.19188	5.8215	6.54349
Dot	FBgn0015663	2.3002	2.03285	5.15698	2.64792	4.10505	3.66558
Dref	FBgn0015664	15.326	16.4928	16.1425	13.7602	19.0108	15.8065
Cyp6a17	FBgn0015714	5.13089	6.21903	8.86548	3.62278	6.64284	7.831
Hmu	FBgn0015737	64.4826	60.3877	38.6223	58.6928	68.5954	75.6654
Lis-1	FBgn0015754	21.9418	19.5457	20.5183	27.2461	24.7211	26.7712
RpL9	FBgn0015756	172.443	211.805	198.702	164.1	188.211	278.172
p38a	FBgn0015765	7.13232	8.4269	10.6836	6.93093	7.80102	3.37394
MstProx	FBgn0015770	4.51757	5.69862	10.9665	0.728357	0.521025	0.0264074
Nak	FBgn0015772	7.61634	8.25572	9.79082	8.76118	10.1552	13.1294
NetA	FBgn0015773	0.835524	2.18303	1.54091	2.34534	1.23923	3.11788
NetB	FBgn0015774	3.69085	2.52869	3.01317	9.75415	11.7434	14.6486
nrv1	FBgn0015776	18.9121	20.4505	21.1213	25.0038	21.5351	23.8212
nrv2	FBgn0015777	32.6631	31.105	23.6212	19.0667	22.1498	22.2837
rin	FBgn0015778	229.515	222.83	96.6882	116.486	194.22	159.567
P5cr	FBgn0015781	6.51451	7.66285	14.4561	11.2557	10.004	10.0301
Rab10	FBgn0015789	49.9721	40.8489	32.4649	27.5968	35.5595	31.7129
Rab11	FBgn0015790	393.329	363.85	354.691	365.309	291.34	361.84
Rab14	FBgn0015791	10.9438	14.9782	15.1027	13.7326	10.9828	15.4933
Rab19	FBgn0015793	2.09193	7.85052	6.2157	4.30028	8.2672	4.0537
Rab18	FBgn0015794	9.36564	6.44673	14.7729	11.0286	10.7117	11.6854
Rab7	FBgn0015795	89.7436	89.6641	71.3769	61.1678	63.3594	64.2511
Rab6	FBgn0015797	82.9555	68.9204	51.9986	49.6233	51.039	47.8864
Rbf	FBgn0015799	13.2005	13.9256	13.4827	12.1892	14.9694	16.2571
Reg-5	FBgn0015801	3.46109	5.72121	3.77611	3.02379	3.45928	2.66017
RtGEF	FBgn0015803	3.44584	3.87064	3.12476	2.79659	3.24508	3.24192
HDAC1	FBgn0015805	30.6995	29.5618	29.6421	29.4564	33.0574	33.986
S6K	FBgn0015806	30.9354	39.3497	23.9021	24.7885	55.6887	38.1771
ScpX	FBgn0015808	21.7388	14.1864	16.414	13.9635	9.70287	7.6397
Spx	FBgn0015818	2.81385	2.59803	2.874	5.8325	3.81449	4.08947
TfIIEalpha	FBgn0015828	1.48452	3.73527	2.11725	3.46669	2.68507	2.23053
TfIIEbeta	FBgn0015829	13.2316	14.0029	11.3604	10.244	10.7077	15.676
Trip1	FBgn0015834	33.6328	44.6896	42.1856	26.2419	30.5044	46.1078
Vang	FBgn0015838	14.2322	10.8043	8.80999	9.57074	10.6771	11.742
apt	FBgn0015903	10.9189	5.81183	11.2273	12.3852	23.5382	40.903
ast	FBgn0015905	3.4386	3.0599	2.34575	3.08709	1.93486	4.07954
crq	FBgn0015924	73.691	62.5142	34.0142	29.949	24.5046	18.4501
csul	FBgn0015925	9.95215	8.13998	13.2215	6.53088	7.54596	8.55847
dpa	FBgn0015929	3.85765	4.52858	4.24007	4.66773	5.74183	4.74042
hrg	FBgn0015949	20.4516	19.332	17.7186	16.5403	20.4713	21.9531
lama	FBgn0016031	5.30856	5.20698	4.91586	4.44332	8.19126	4.25808
Vsp37A	FBgn0016038	23.6075	17.0747	16.8098	9.93549	14.0964	15.3042
Tom40	FBgn0016041	34.6656	49.7889	34.055	32.6046	58.8112	51.8285
Sema-1b	FBgn0016059	15.592	13.0004	13.3217	13.3238	12.4723	10.737
smg	FBgn0016070	5.99248	5.31108	7.39089	7.13209	6.28828	7.56966
vkg	FBgn0016075	80.705	83.9979	43.9636	9.99854	18.8175	2.74199
vri	FBgn0016076	50.3834	45.4724	32.9419	37.3005	38.0604	28.0835
fry	FBgn0016081	7.07579	5.01115	6.17858	4.97835	3.76668	4.2749
ATPsynCF6	FBgn0016119	9.30323	15.8428	6.70737	6.41224	7.99697	8.4428
ATPsynD	FBgn0016120	30.821	29.5683	22.4426	19.2573	23.0338	31.8268
CaMKI	FBgn0016126	24.2925	27.3193	33.1706	26.7424	23.8077	28.2977
Cdk4	FBgn0016131	8.9587	8.83668	9.4735	9.10344	9.53512	8.88701
PTP-ER	FBgn0016641	12.8066	12.9573	8.18628	7.1088	9.7653	12.0315
H15	FBgn0016660	3.0814	7.34209	3.96747	4.31938	4.43409	4.98684
Ipp	FBgn0016672	2.95405	3.14284	4.28659	1.35572	1.96991	1.65892
Lectin-galC1	FBgn0016675	15.2278	9.79652	11.8771	11.8952	9.93662	7.831
Nlp	FBgn0016685	116.025	107.862	114.87	100.023	133.173	152.023
Nurf-38	FBgn0016687	20.0956	24.0805	38.9369	40.0529	24.6015	25.3595
ATPsynO	FBgn0016691	26.7811	32.7928	47.9942	47.6958	31.9201	37.0557
Past1	FBgn0016693	49.721	44.2185	46.544	64.9763	43.4652	44.1116
Pdp1	FBgn0016694	3.95166	6.35274	6.1301	3.53638	8.93513	11.4401
Pitslre	FBgn0016696	6.06213	4.4545	6.10906	6.18724	4.51171	6.88142
Prosalpha5	FBgn0016697	27.7226	32.9304	55.1164	51.7083	27.3147	42.3869
Ptpa	FBgn0016698	0.138285	1.08733	2.56803	2.27413	1.29634	4.0195
Rab1	FBgn0016700	73.9987	72.6642	54.5711	46.4469	51.6399	50.233
Rab4	FBgn0016701	28.9094	20.8218	28.8138	28.6456	23.8116	22.9753
Reg-2	FBgn0016715	9.81701	8.10891	13.4502	12.5567	20.4508	17.755
RpL29	FBgn0016726	60.6616	61.9453	61.4296	44.5863	44.5103	54.6962
sba	FBgn0016754	6.18927	6.85586	7.39164	5.27403	6.34666	6.68809
Usp47	FBgn0016756	18.0464	18.7145	16.0964	17.2558	18.6589	19.2885
angel	FBgn0016762	2.8973	2.23895	1.86134	2.63989	1.64086	3.85183
dmt	FBgn0016792	4.86108	4.40281	5.87613	4.49361	5.06145	6.50783
dos	FBgn0016794	8.11232	7.11201	5.94933	6.1952	4.98565	4.61536
fz2	FBgn0016797	2.60839	2.93127	2.21711	2.12344	2.24699	2.92476
Stat92E	FBgn0016917	106.058	134.26	139.246	83.4074	129.467	114.414
Pino	FBgn0016926	30.5495	30.3294	25.9019	30.3212	35.5214	27.0118
Dyrk2	FBgn0016930	6.82277	4.97427	4.24507	6.53713	7.54608	7.66664
spen	FBgn0016977	84.9301	70.0105	56.3355	56.9522	70.9143	66.6579
snRNP-U1-70K	FBgn0016978	8.88667	8.92125	6.26143	6.07139	5.47694	5.90247
smid	FBgn0016983	19.3997	13.7452	23.7498	20.2787	22.1483	25.7202
sktl	FBgn0016984	11.0015	7.34421	6.86528	8.00454	7.91634	7.78332
cag	FBgn0017414	5.89243	4.67999	5.0795	4.06751	4.09171	4.42416
ari-1	FBgn0017418	19.9233	18.4738	8.46954	10.428	12.9498	9.12397
CG5989	FBgn0017429	2.70446	4.83297	4.93101	4.70025	2.57595	3.90301
Nelf-E	FBgn0017430	5.57328	2.91776	4.08164	2.90453	1.99116	1.68491
U2af38	FBgn0017457	3.37542	3.16159	12.1908	8.03931	8.40805	9.10857
T3dh	FBgn0017482	0.835818	1.54635	0.949555	2.8299	1.30136	1.89079
RpS3A	FBgn0017545	1900.83	1746.66	1973.04	1537.38	1853.52	1721.54
Rga	FBgn0017550	6.6047	4.60251	4.28976	3.84795	4.46565	3.35422
Rca1	FBgn0017551	2.79266	3.99246	2.12054	2.80659	3.62749	1.33208
Pdk	FBgn0017558	39.1777	45.1732	23.4716	12.24	20.6472	10.0462
ND-75	FBgn0017566	4.09543	3.55478	4.94352	4.7506	3.30689	1.8968
ND-23	FBgn0017567	6.58569	6.89319	8.21155	9.47653	5.83648	5.88998
Mo25	FBgn0017572	46.2999	52.5136	40.6745	46.9561	43.4317	36.6338
Mcm5	FBgn0017577	4.4387	6.68262	7.06116	4.58643	7.49459	10.0123
Max	FBgn0017578	8.29407	11.9642	8.43668	6.57413	8.32321	9.89051
RpL14	FBgn0017579	439.256	463.36	455.856	314.996	468.827	784.036
Lk6	FBgn0017581	121.346	99.14	74.1624	60.3603	108.487	90.5196
COX5A	FBgn0019624	30.6129	35.6348	25.706	25.9678	30.0256	22.401
Atu	FBgn0019637	4.13777	5.15407	4.32132	4.81716	3.38868	1.86865
ATPsynB	FBgn0019644	19.3051	23.5492	30.2392	28.0381	24.531	27.0246
qm	FBgn0019662	42.6092	36.2243	18.1747	19.4644	30.8688	22.4244
lok	FBgn0019686	1.14521	1.69367	2.28804	1.75343	1.43722	1.23614
colt	FBgn0019830	3.05868	6.32655	8.12136	10.8628	8.11034	6.9262
Letm1	FBgn0019886	19.8553	10.6488	12.7766	17.9685	10.2363	12.3779
Smg5	FBgn0019890	10.225	8.32226	8.90104	7.72386	8.44205	8.62086
Surf4	FBgn0019925	21.5991	22.4878	23.9792	31.949	25.6335	25.4591
SamDC	FBgn0019932	32.0266	28.0116	54.4773	25.1048	33.9326	46.0967
RpS20	FBgn0019936	305.683	265.626	377.769	275.784	219.981	434.829
RpI1	FBgn0019938	3.94519	4.93513	8.53809	7.43932	6.58931	10.1612
Psn	FBgn0019947	12.886	10.8919	12.9955	8.93283	8.45434	9.96847
Phm	FBgn0019948	8.77237	11.4245	13.9252	9.53523	8.54827	8.86667
Cdk9	FBgn0019949	3.589	2.23895	7.65864	5.5266	3.95821	2.27608
Orct	FBgn0019952	8.36536	3.20728	9.65988	5.65914	2.76778	2.44854
ND-42	FBgn0019957	4.16694	7.65921	9.90491	8.61473	4.59559	8.41179
Mitofilin	FBgn0019960	11.3653	8.81252	13.3551	11.3515	12.5344	13.3231
Khc-73	FBgn0019968	4.80687	4.03619	6.12778	4.56523	3.83133	3.69833
Drice	FBgn0019972	19.793	21.8655	21.5341	21.0013	14.0015	18.0597
Gcn2	FBgn0019990	1.84481	2.10991	2.44173	2.16505	1.86812	1.55993
Ppox	FBgn0020018	1.33853	2.49599	1.64273	2.87118	1.41204	1.24917
Cbl	FBgn0020224	10.8774	9.48699	8.11482	8.45503	10.4947	7.34872
ATPsyngamma	FBgn0020235	34.0404	37.5362	39.7909	31.8414	34.8502	49.0296
ATPCL	FBgn0020236	21.2876	19.4532	27.6024	24.1113	22.5227	30.196
14-3-3epsilon	FBgn0020238	611.03	545.955	285.714	266.718	427.262	412.305
stck	FBgn0020249	21.4779	33.6628	21.9653	16.4097	18.3191	12.4613
sfl	FBgn0020251	5.62343	4.7473	5.32995	4.36323	4.67444	4.5518
Ran	FBgn0020255	251.903	297.301	225.944	206.921	331.264	327.499
Ppa	FBgn0020257	14.568	19.0514	13.305	13.8442	14.1439	13.8407
pcm	FBgn0020261	3.29162	4.42447	6.11271	5.7956	3.82753	4.33585
mspo	FBgn0020269	6.12163	7.08048	2.69637	4.85652	5.73358	3.63162
mre11	FBgn0020270	2.67943	0.820838	3.412	2.43924	2.48014	3.50897
mst	FBgn0020272	2.48379	2.3109	4.80288	3.76047	2.69582	2.78557
loco	FBgn0020278	6.26536	6.5518	5.78257	5.12079	6.05134	5.22169
lig	FBgn0020279	50.1587	40.9478	29.016	33.3213	43.1142	34.6601
stumps	FBgn0020299	1.05803	3.05038	1.36227	1.43546	0.914047	2.12908
drongo	FBgn0020304	27.721	25.1856	19.9932	19.0695	19.5252	25.9611
dbe	FBgn0020305	3.57628	6.39093	5.31307	3.74263	4.12346	6.90582
dom	FBgn0020306	31.4395	30.1196	32.7724	29.5741	33.9231	37.5726
crol	FBgn0020309	56.1204	59.0787	38.0816	43.0508	47.5223	46.6167
CG4050	FBgn0020312	8.84422	8.75053	9.73433	9.44508	7.70212	10.2974
Rpt6	FBgn0020369	11.4564	13.5342	17.6315	13.3687	11.8783	9.01904
TppII	FBgn0020370	12.067	11.2148	14.5677	14.0195	12.0503	13.459
TM4SF	FBgn0020372	7.04653	5.94247	9.17473	0.358062	1.57175	0.637295
Sr-CIII	FBgn0020376	5.52496	3.06514	22.0516	9.01812	7.00277	9.80887
Rfx	FBgn0020379	1.42125	1.13982	1.02998	1.02612	1.07046	1.06959
Dredd	FBgn0020381	11.8985	11.2059	16.8391	10.0155	10.5726	16.5423
Pdk1	FBgn0020386	16.6832	14.6405	12.8701	16.4087	18.6734	15.8877
Gcn5	FBgn0020388	2.43397	3.52938	5.26904	4.88904	2.14749	2.36344
Papss	FBgn0020389	26.5194	22.4568	22.6281	43.8471	22.1987	24.0876
Nmt	FBgn0020392	17.7004	15.6541	24.954	24.4321	13.0728	17.542
asun	FBgn0020407	1.73577	1.04774	1.94837	2.60077	1.65908	1.96637
JIL-1	FBgn0020412	11.6729	11.229	9.25322	9.33552	10.8081	10.4008
Idgf3	FBgn0020414	5.62695	4.59682	9.19196	1.74257	1.28952	1.50322
Idgf2	FBgn0020415	15.2303	10.5035	39.9156	10.4067	8.28026	12.4223
Idgf1	FBgn0020416	4.79912	6.76567	4.55513	0.767304	0.147023	1.07304
Fak	FBgn0020440	7.73063	5.34217	8.35268	9.38691	7.07025	7.34322
Elf	FBgn0020443	76.3274	68.7073	62.9612	61.36	76.2287	73.9887
E23	FBgn0020445	45.2117	29.042	31.9029	32.4539	22.6105	33.292
Dad	FBgn0020493	11.6634	16.0398	7.07027	9.63094	14.0326	14.3348
CtBP	FBgn0020496	101.905	90.8857	57.829	67.1722	95.4233	95.5042
emb	FBgn0020497	30.6186	31.2359	35.7089	34.1152	36.748	36.7998
CLIP-190	FBgn0020503	7.32308	6.07456	8.49903	5.84582	6.38783	9.05463
Abi	FBgn0020510	25.0314	22.2775	17.4335	15.5386	13.6141	14.7885
ade5	FBgn0020513	15.5616	12.8516	16.1047	15.3424	13.7466	12.8029
snoRNA:Me28S-G764	FBgn0020518	16.0526	0	7.33798	15.2301	10.8948	22.0874
kraken	FBgn0020545	3.50239	6.88478	2.38484	3.77984	6.11592	2.3493
SA	FBgn0020616	3.31301	3.3344	2.91379	2.72416	1.13999	2.22819
Rack1	FBgn0020618	201.62	203.575	243.246	207.652	200.15	265.75
RN-tre	FBgn0020620	19.0804	15.9454	15.3509	10.8428	15.7155	12.6276
Pkn	FBgn0020621	5.46992	6.59455	4.52394	4.34006	5.27388	4.68026
Pi3K21B	FBgn0020622	31.0325	36.4734	30.803	27.0886	41.8829	38.8315
Osbp	FBgn0020626	5.30804	3.94264	5.55093	5.19363	6.21384	4.82687
Mcm7	FBgn0020633	1.96483	3.98873	1.98494	2.1649	2.7737	4.00656
KrT95D	FBgn0020647	15.9932	11.7104	8.4823	10.2964	8.12153	8.89263
Trxr-1	FBgn0020653	9.83871	13.6215	17.2837	17.3722	14.2393	11.609
ArfGAP1	FBgn0020655	4.52707	9.04762	5.7648	7.90068	5.96076	4.54461
eIF-4B	FBgn0020660	67.2005	63.403	81.9681	66.0934	82.2378	95.5977
Atet	FBgn0020762	4.37131	3.33473	4.96615	2.14453	3.20049	3.67956
Alas	FBgn0020764	5.01971	5.6065	6.9914	6.44925	3.51773	4.48943
PheRS-m	FBgn0020766	4.92309	4.60188	4.40711	4.41135	5.70797	4.00787
Spred	FBgn0020767	9.36114	12.2264	5.70027	7.48824	9.73783	8.22753
Su(z)12	FBgn0020887	14.1959	11.021	10.2307	10.7064	10.2906	8.95463
Rtc1	FBgn0020909	3.62757	3.06931	4.61937	3.53068	2.85768	6.68735
RpL3	FBgn0020910	164.397	165.284	205.881	184.875	163.407	197.186
Dgkepsilon	FBgn0020930	14.1838	12.3995	14.2379	12.4508	16.2242	13.3711
Crg-1	FBgn0021738	14.095	14.3293	3.83902	5.79488	13.9905	10.575
SerRS-m	FBgn0021750	2.3777	2.96758	3.75669	3.32055	2.49743	3.03789
chb	FBgn0021760	13.7683	13.4478	12.4296	12.9038	12.223	10.4258
Nup154	FBgn0021761	8.20994	7.06262	9.60977	7.77355	7.15345	9.23394
sdk	FBgn0021764	2.88998	2.47607	2.40853	3.44442	4.34224	4.88117
scu	FBgn0021765	41.8727	39.8273	88.9584	117.398	67.5374	48.9956
nudC	FBgn0021768	28.5622	21.8174	26.642	25.3898	27.702	29.6342
Tapdelta	FBgn0021795	32.7296	38.7577	52.7253	66.3891	40.9892	51.3143
Tor	FBgn0021796	7.01838	6.15467	6.39581	7.26821	5.47943	6.58973
Reph	FBgn0021800	4.64837	3.82957	3.42364	3.3687	5.25689	6.72922
Vps28	FBgn0021814	13.1377	11.1518	11.9547	9.0472	10.6858	7.19678
cnk	FBgn0021818	7.63438	6.29763	5.36344	6.33193	5.31485	6.93157
DCTN2-p50	FBgn0021825	11.4898	8.72005	12.4335	11.0222	7.82208	13.0036
l(2)k14710	FBgn0021847	1.56408	1.87828	1.25477	1.6719	0.758988	0.3637
l(2)k14505	FBgn0021856	26.8406	25.8424	19.6665	18.5418	21.3455	21.719
Xbp1	FBgn0021872	28.598	42.3629	28.1238	44.7377	26.0849	40.738
Nle	FBgn0021874	1.82416	2.52094	3.25206	4.09983	3.35303	5.71011
ytr	FBgn0021895	94.7025	97.4902	51.1084	54.3873	71.3609	88.0908
RFeSP	FBgn0021906	23.0882	23.4009	47.3556	33.648	29.0738	24.5787
Coprox	FBgn0021944	6.43418	8.63531	6.82777	7.34203	6.15476	8.98403
ND-PDSW	FBgn0021967	24.0137	28.1735	26.5629	16.5261	22.5978	16.3411
l(2)k09913	FBgn0021979	12.384	11.9363	13.1161	23.4864	19.0331	20.2937
Rs1	FBgn0021995	2.504	2.42013	5.39668	3.6539	3.57839	5.42521
eIF-3p40	FBgn0022023	89.1693	59.9197	98.5182	80.7849	67.029	76.6402
Vps25	FBgn0022027	1.7047	3.24945	2.32153	2.80342	2.66343	4.1927
l(2)k01209	FBgn0022029	6.15663	3.38526	9.14654	8.7131	6.98584	10.1389
Nnp-1	FBgn0022069	10.5941	12.9	18.718	16.323	17.618	17.545
Vha36-1	FBgn0022097	17.3803	17.3414	11.4311	13.1746	11.481	9.31035
l(2)k05819	FBgn0022153	8.07833	14.935	14.62	12.5453	11.4809	13.087
Cas	FBgn0022213	20.6795	18.8443	29.2635	23.6587	24.021	21.5286
ubl	FBgn0022224	2.18899	8.6929	2.89072	2.3999	2.14594	2.61033
lolal	FBgn0022238	67.0842	62.3127	35.9811	38.4444	54.2175	50.1712
Rpp30	FBgn0022246	6.01429	7.97513	2.97836	4.01359	2.88391	5.61281
l(2)09851	FBgn0022288	4.5738	5.93057	10.1925	8.70246	6.7453	8.84717
dnk	FBgn0022338	9.26512	10.0825	9.96395	6.25387	11.4383	16.449
CG3760	FBgn0022343	64.6954	38.8569	56.8722	53.4484	60.2892	56.0122
CG10340	FBgn0022344	10.0628	15.1201	9.45801	7.42997	14.9483	16.8058
CG1910	FBgn0022349	66.9604	64.9093	52.6917	54.0934	60.799	61.3408
Sodh-2	FBgn0022359	1.35958	1.2276	2.12616	0.529547	0.315673	0.511982
Pur-alpha	FBgn0022361	54.0451	62.343	38.9102	51.0635	62.6264	40.5472
Pka-R2	FBgn0022382	8.92731	8.99063	5.68826	5.25259	11.4429	10.7166
D19B	FBgn0022699	5.88297	3.53855	4.26341	4.63087	4.66831	3.75363
Cht2	FBgn0022702	2.85333	2.85544	3.95642	0.469237	0.419581	0.0850636
Adk1	FBgn0022709	1.59765	2.28405	2.37354	1.18858	1.34248	2.65363
zf30C	FBgn0022720	6.47283	9.20747	8.27002	8.94157	7.42425	9.0888
Taf8	FBgn0022724	1.07736	1.74558	2.98772	2.00797	3.24771	1.47744
Sin3A	FBgn0022764	27.2559	26.0308	28.5239	27.8504	29.5862	33.3372
Pp2C1	FBgn0022768	13.3909	12.5685	9.17797	5.49842	10.1638	8.57615
Orc1	FBgn0022772	2.35289	2.18426	3.22317	3.54275	4.54956	5.13785
Oat	FBgn0022774	56.4676	45.0423	30.315	38.0419	26.3967	19.6271
Hira	FBgn0022786	4.13989	4.63012	5.52279	5.3261	3.3855	4.68486
Hel89B	FBgn0022787	18.1626	11.4241	15.8289	14.2123	11.0566	16.6758
Df31	FBgn0022893	1081.21	1080.21	726.581	650.797	1370.46	1227.19
D19A	FBgn0022935	1.25124	1.57585	2.25723	2.47413	1.31425	2.15819
CycH	FBgn0022936	2.62268	4.52521	2.14972	4.01561	3.39118	3.9633
Cbp80	FBgn0022942	14.7521	16.3332	17.2356	14.3818	16.5295	19.4351
Cbp20	FBgn0022943	39.4895	36.4893	18.1248	19.7992	21.5989	24.2631
yps	FBgn0022959	132.87	148.857	84.935	81.2085	124.834	125.913
vimar	FBgn0022960	23.0381	20.198	17.3606	17.3457	21.4591	20.4306
qkr58E-3	FBgn0022984	76.2616	59.1717	65.4625	60.9206	77.4715	79.5646
qkr58E-2	FBgn0022985	11.2358	12.4553	12.3631	13.29	12.9218	14.2673
qkr58E-1	FBgn0022986	25.9516	18.576	18.8291	19.0037	17.8932	16.2884
qkr54B	FBgn0022987	17.5594	20.1324	12.2363	14.4741	17.5682	15.6267
mth	FBgn0023000	11.0644	9.95733	11.9439	16.3302	9.17388	11.6397
CRMP	FBgn0023023	0.718774	1.6637	1.01699	2.27965	2.3404	1.92853
gek	FBgn0023081	6.35443	5.6879	6.83518	5.17849	4.92855	5.19409
fray	FBgn0023083	15.5956	15.7156	12.8396	15.3401	14.9318	11.9555
cyc	FBgn0023094	5.92712	8.64305	6.78029	7.89531	7.0598	9.38275
caps	FBgn0023095	0.417813	0.483542	1.00497	1.30877	2.01871	2.59793
bon	FBgn0023097	4.44203	3.74392	5.22031	4.72918	4.29575	5.36621
aay	FBgn0023129	11.4647	9.54593	8.60977	12.0686	7.50306	4.78874
a6	FBgn0023130	1.91068	1.3037	3.35469	2.42803	3.35242	0.932094
Uba1	FBgn0023143	54.1568	48.5723	46.2252	46.1905	45.9578	41.097
SmD3	FBgn0023167	9.19142	9.99404	11.3472	6.49328	9.28031	6.13639
AMPKalpha	FBgn0023169	1.38414	2.89581	1.80556	1.66555	1.3776	0.815215
RpL39	FBgn0023170	138.454	125.743	55.6463	37.6734	55.3249	53.8381
rnh1	FBgn0023171	4.78102	5.46806	5.81144	3.57386	4.7935	5.0534
RhoGEF2	FBgn0023172	27.5577	19.796	18.2784	17.6013	13.9946	12.912
Prosbeta2	FBgn0023174	20.679	18.244	31.2751	28.4158	16.8479	31.2407
Prosalpha7	FBgn0023175	77.171	59.1132	54.392	47.9562	49.085	42.8057
Pp4-19C	FBgn0023177	6.65898	8.77319	11.186	6.15537	10.752	9.38092
Orc6	FBgn0023180	4.35997	2.83324	3.68031	2.11843	3.60637	4.07663
Orc4	FBgn0023181	1.13313	1.79047	1.59482	1.86345	1.18392	1.01342
EloB	FBgn0023212	18.1141	20.7627	16.4785	14.8289	15.5772	18.5556
eIF4G	FBgn0023213	155.514	153.678	169.137	156.934	177.611	200.611
edl	FBgn0023214	14.6395	30.7779	12.0062	7.78895	10.374	6.63535
Mnt	FBgn0023215	36.3615	42.7352	21.1684	23.467	31.8718	32.993
Parg	FBgn0023216	1.7047	1.58941	2.86291	2.52918	2.86097	1.98863
Dap160	FBgn0023388	18.239	15.8689	14.7678	12.991	12.6572	11.3148
Chd3	FBgn0023395	1.57071	1.75151	3.68694	1.83398	1.90552	2.69717
B4	FBgn0023407	6.64738	8.63779	5.16706	8.79421	8.22142	4.25715
Acp32CD	FBgn0023415	1.19579	3.57449	0.484505	2.77099	1.07902	1.45837
slmb	FBgn0023423	18.5626	18.9667	13.3584	12.1789	16.9435	16.577
Rbcn-3A	FBgn0023458	5.48202	5.45145	5.98619	5.90829	5.1877	4.08317
Taldo	FBgn0023477	10.5291	11.3512	15.6425	15.4703	10.946	12.8131
Es2	FBgn0023506	1.39265	4.14122	2.97933	3.06893	2.45746	4.13517
Ocrl	FBgn0023508	4.59641	5.67509	3.8799	4.93906	3.91715	4.34442
mip130	FBgn0023509	7.12831	4.97599	5.04685	5.35763	6.38756	7.04768
Rbcn-3B	FBgn0023510	6.98418	7.99602	6.54092	6.17914	7.27561	7.37509
Edem1	FBgn0023511	5.71571	3.47716	6.7149	6.06642	6.46016	8.80988
eIF2B-epsilon	FBgn0023512	3.18822	3.60136	3.27465	4.62817	3.68984	5.2452
CG14803	FBgn0023513	1.04232	1.16794	1.75777	1.41299	1.92626	3.90519
CG14805	FBgn0023514	5.53929	6.38377	8.56528	8.22642	7.41822	7.9367
CG14814	FBgn0023515	4.44286	3.04108	3.44025	3.40964	2.67267	3.29922
Pgam5	FBgn0023517	3.85263	6.50925	6.11387	7.05571	6.47	8.22255
trr	FBgn0023518	7.77338	6.55851	7.21132	7.30622	6.91209	7.19051
mRpL16	FBgn0023519	5.90784	4.60692	6.25024	5.88823	6.81175	5.3638
CG11596	FBgn0023522	9.01051	13.755	6.80663	7.409	7.74783	8.24076
CG2865	FBgn0023526	56.1928	57.929	33.5264	28.5301	69.5582	64.9689
CG3071	FBgn0023527	1.15318	1.00351	2.3836	3.58673	2.59892	3.31829
CG2924	FBgn0023528	41.5566	33.7947	23.1635	20.0318	27.1107	33.1182
CG2918	FBgn0023529	63.9864	64.3682	71.0858	73.0707	75.6411	79.5259
CG32809	FBgn0023531	1.58144	2.44173	1.22171	1.01948	1.8697	0.509175
CG3156	FBgn0023536	1.51969	1.58541	1.83058	1.38468	1.04185	1.57956
CG17896	FBgn0023537	4.18764	4.69066	2.82205	4.01131	4.18992	3.89971
CG3630	FBgn0023540	1.09073	3.86443	2.88858	2.80757	4.75942	5.5137
Nmd3	FBgn0023542	12.7991	13.9156	15.1799	11.5855	9.37095	14.2366
CG4406	FBgn0023545	5.68447	6.52423	3.80623	3.35747	2.64897	4.36792
Mct1	FBgn0023549	5.39272	2.54114	2.10361	1.31293	0.465166	0.377221
vig	FBgn0024183	102.743	119.442	72.8183	89.9536	161.856	136.569
syd	FBgn0024187	6.10984	5.12801	3.54412	4.34651	4.78878	4.72763
san	FBgn0024188	30.2775	24.0286	37.1894	29.1107	24.0581	32.7293
sns	FBgn0024189	1.29617	0.839414	0.839386	1.49393	2.62688	3.02197
rasp	FBgn0024194	0.978702	1.89301	2.65141	4.07108	1.07938	1.33871
robl	FBgn0024196	17.1797	17.7672	21.1785	12.4731	10.8844	12.2592
IKKbeta	FBgn0024222	5.72939	6.97333	8.10923	6.90743	7.0019	7.47848
aurB	FBgn0024227	2.4425	1.97872	2.54007	1.87448	1.70605	13.6165
Hs2st	FBgn0024230	5.59704	8.66849	9.26797	9.2524	8.68052	8.70796
gbb	FBgn0024234	6.68383	7.59531	5.85602	7.65662	4.15823	5.46684
foi	FBgn0024236	7.70984	10.9568	8.02123	7.54344	8.27587	9.24839
Fim	FBgn0024238	19.521	28.1018	10.1151	15.2144	27.8407	9.8522
drm	FBgn0024244	2.46174	1.61305	1.37148	2.22099	2.90353	3.0579
dnt	FBgn0024245	6.31399	6.67868	4.98838	4.35147	4.02516	4.43925
chico	FBgn0024248	6.21826	6.81166	10.9577	8.05691	9.35174	8.85967
brk	FBgn0024250	6.12151	5.90617	3.62878	4.68634	4.48974	5.71756
WASp	FBgn0024273	11.4038	8.81252	7.37203	6.4878	6.28845	7.58041
trio	FBgn0024277	18.6826	19.1237	11.7856	10.9779	12.5014	8.9207
Srp54	FBgn0024285	23.0183	27.6811	26.754	23.9	17.5712	22.4839
Sirt1	FBgn0024291	10.8731	11.2427	11.608	10.895	12.661	12.2348
Plap	FBgn0024314	7.05487	8.645	5.39023	8.14895	5.26118	4.83736
Npc1a	FBgn0024320	41.0611	35.4438	30.2533	19.7306	27.7923	27.9237
NK7,1	FBgn0024321	2.75314	6.42349	3.86112	2.53545	8.01598	5.39736
Mkk4	FBgn0024326	29.4103	28.4102	26.4944	24.6839	25.3025	25.2974
Mekk1	FBgn0024329	5.46416	4.64603	8.70945	7.00798	4.51531	3.83261
MED6	FBgn0024330	6.35748	3.24601	5.05978	4.29402	3.95648	6.9855
Mcm3	FBgn0024332	1.19211	2.05516	2.60449	2.88303	1.81745	0.783955
Hop	FBgn0024352	120.407	115.779	115.576	102.372	133.528	134.981
CG11412	FBgn0024362	10.2184	10.619	8.59641	9.0096	7.15099	8.18468
CG11417	FBgn0024364	2.54493	3.30246	2.38484	3.73448	2.97945	4.86732
CG12773	FBgn0024365	13.6036	15.6931	10.602	13.3658	13.3634	11.2136
E2f2	FBgn0024371	8.65976	7.01546	6.0038	8.07	7.7466	5.12027
Dlc90F	FBgn0024432	94.3092	68.6791	49.0997	41.5395	44.3901	58.1663
Bin1	FBgn0024491	3.69557	2.39399	3.43143	3.15742	4.13942	7.59157
Sec13	FBgn0024509	18.1557	18.0397	30.4532	21.6707	20.1408	19.7139
dlt	FBgn0024510	1.44474	3.09815	3.14799	2.93028	1.75269	1.93817
Neos	FBgn0024542	3.65588	5.4166	3.45629	2.89677	4.69174	5.58817
flfl	FBgn0024555	61.8106	51.3449	47.0985	44.8354	49.3083	42.7328
EfTuM	FBgn0024556	4.98933	9.61388	9.74885	9.98878	7.95483	9.60356
Dph5	FBgn0024558	8.88018	11.2305	9.514	9.54854	8.38114	18.4042
fws	FBgn0024689	2.17751	2.22359	2.83062	3.67688	3.00189	4.5557
Cpsf160	FBgn0024698	2.94215	3.382	5.49326	4.1846	2.74055	3.41364
Slip1	FBgn0024728	43.1678	33.2756	36.1535	33.8933	38.7502	43.1928
Drep1	FBgn0024732	8.27609	8.18627	6.11441	7.39366	8.43673	7.96194
RpL10	FBgn0024733	1223.64	1333.58	1060.49	717.516	1270.56	1484.42
PRL-1	FBgn0024734	268.795	259.224	186.546	224.76	260.206	216.512
Flo1	FBgn0024754	62.6316	66.741	29.4	23.9754	38.7166	29.4668
Dbp80	FBgn0024804	31.5763	34.2057	35.1832	30.1463	30.651	35.2643
DIP2	FBgn0024806	20.2958	15.2505	16.0651	13.9649	11.6753	14.3617
DIP1	FBgn0024807	39.8817	36.2338	26.3499	23.0153	27.1186	29.6751
Crk	FBgn0024811	104.336	115.474	62.0024	68.2247	111.155	87.601
Clc	FBgn0024814	203.044	183.627	166.498	132.257	149.892	147.101
AP-1mu	FBgn0024833	6.09177	3.60912	5.21812	5.46029	2.60264	2.84683
Pcd	FBgn0024841	94.7216	58.6868	37.8943	120.707	73.8439	93.864
p38b	FBgn0024846	1.42808	2.04162	4.95042	3.21832	1.57498	1.84487
kin17	FBgn0024887	6.29731	4.64355	3.93918	4.90551	4.67882	3.79424
Kap-alpha1	FBgn0024889	14.8912	17.6122	15.8373	12.7902	15.4166	16.3972
Taf7	FBgn0024909	8.86054	9.74405	7.15136	6.30491	7.79883	10.7057
agt	FBgn0024912	3.89155	2.38434	2.89072	1.37137	1.68609	1.61592
Ts	FBgn0024920	4.15031	6.34259	6.48479	5.76618	5.05076	5.18382
Trn	FBgn0024921	33.5505	38.9621	29.0884	32.1286	45.8823	38.6696
NitFhit	FBgn0024945	4.28911	4.86939	8.71475	5.29016	3.47819	1.80518
NTPase	FBgn0024947	9.79657	11.2535	8.57931	8.36625	7.12708	9.43801
Mat1	FBgn0024956	3.17612	2.61088	4.24671	3.78682	2.97742	3.76379
Irp-1B	FBgn0024957	12.7159	8.82847	13.9589	21.7033	9.99625	10.2443
Irp-1A	FBgn0024958	6.91789	6.54556	7.59641	9.45305	5.30751	4.36384
Syx4	FBgn0024980	2.59247	3.06169	3.18165	2.54875	2.17545	0.705661
CG4293	FBgn0024983	6.12118	3.24848	7.30265	8.19802	5.83029	4.97685
CG11448	FBgn0024985	27.7868	18.4488	12.6179	9.61034	16.1335	13.9676
CG3719	FBgn0024986	1.73855	2.81688	1.72191	3.43091	2.30088	1.45123
ssx	FBgn0024987	25.9654	25.9209	15.181	14.1546	20.4588	21.8633
CG2694	FBgn0024991	0.458355	0.698962	3.35936	1.95982	2.39273	2.35029
CG2658	FBgn0024992	1.26128	1.96708	1.23501	1.36709	1.23296	0.512744
CG2662	FBgn0024993	0.709408	1.95036	1.21607	1.43586	1.20367	1.22013
Csat	FBgn0024994	5.47397	12.1112	8.58414	11.0382	8.09735	8.08179
eIF2B-beta	FBgn0024996	3.97471	1.82647	2.7416	3.91023	2.73975	3.87222
CG2685	FBgn0024998	0.740131	2.39839	1.31948	2.51547	2.50323	1.72106
Ant2	FBgn0025111	1.40754	2.49136	1.59321	4.18855	3.76995	2.87736
und	FBgn0025117	20.5525	24.8923	35.3633	26.3687	25.4014	23.9992
az2	FBgn0025185	2.54473	2.47111	1.99728	1.42128	0.847249	1.37413
ari-2	FBgn0025186	9.8301	5.35585	8.75288	8.74113	5.86209	5.2979
RpL31	FBgn0025286	1247.55	1238.36	786.415	467.816	816.52	1027.65
CG4585	FBgn0025335	5.60875	4.42395	4.38179	2.34569	1.86638	3.93516
CG4882	FBgn0025336	4.38337	3.6414	3.78407	5.16289	5.48758	4.45009
Thiolase	FBgn0025352	48.43	39.4157	35.1214	58.714	40.8759	47.5317
Ip259	FBgn0025366	42.8445	38.5837	72.7983	49.654	47.0659	71.9602
Fpps	FBgn0025373	7.16616	10.6209	16.0183	12.9201	7.83084	19.639
rush	FBgn0025381	37.4856	43.6213	29.2912	18.9478	27.0927	19.7545
CG12184	FBgn0025387	1.775	1.70559	1.03751	0.789575	1.09112	1.58749
CG12179	FBgn0025388	3.04004	2.8191	4.15021	3.66511	4.10035	3.96811
inc	FBgn0025394	27.7273	22.5085	24.6118	22.5286	19.7895	22.9048
CycT	FBgn0025455	35.5071	34.6084	23.51	21.6786	29.8807	29.2298
Bub3	FBgn0025457	16.4062	16.3779	40.4478	30.4111	16.2221	23.148
Bap60	FBgn0025463	37.5114	43.5989	26.2382	33.2986	42.9614	41.4687
slv	FBgn0025469	1.18421	5.83137	5.86437	2.92119	3.26508	3.17733
fidipidine	FBgn0025519	16.6616	12.6761	12.1594	9.73435	9.61764	11.9386
unc-119	FBgn0025549	24.4898	18.6805	14.0405	20.9479	17.2659	12.8991
SF1	FBgn0025571	8.57309	9.33604	8.36841	8.29632	7.88487	7.91656
Pli	FBgn0025574	17.7739	14.3944	16.4013	16.1588	16.4602	12.219
Int6	FBgn0025582	28.0076	23.372	30.2185	20.4244	21.1749	29.9227
Gk1	FBgn0025592	12.1636	6.03305	13.719	11.1855	11.2794	10.5234
Faf2	FBgn0025608	9.39567	10.583	12.6896	12.5752	11.3491	7.74833
Torsin	FBgn0025615	10.7946	16.1292	10.3464	8.41787	14.0557	9.84113
CG16989	FBgn0025621	1.52531	1.19582	1.57162	1.5981	0.705446	1.51819
CG4025	FBgn0025624	2.33022	5.88538	5.76978	6.2591	3.94056	4.16811
CG4281	FBgn0025626	6.97783	7.59807	7.09007	6.68891	7.73552	8.95686
CG4194	FBgn0025627	1.84378	4.89529	3.26095	3.10434	2.22712	1.49196
CG4199	FBgn0025628	4.44803	4.73809	3.88716	3.22715	3.5269	1.53405
CG4045	FBgn0025629	3.33922	2.53611	8.52652	5.40563	6.3297	14.3724
moody	FBgn0025631	1.39375	1.32837	0.726532	2.03069	3.47877	1.88071
CG4313	FBgn0025632	2.2366	1.97941	1.89873	1.92664	1.87938	0.984287
CG13366	FBgn0025633	4.29577	5.59435	4.88337	5.89185	5.79263	5.53742
CG13367	FBgn0025634	4.22547	3.64227	3.04644	4.08757	4.04336	3.00104
CG17829	FBgn0025635	7.08706	4.69972	9.13344	7.30183	7.06276	4.84925
SkpA	FBgn0025637	69.9988	65.07	72.8272	66.9137	66.494	58.4081
Roc1a	FBgn0025638	16.3008	18.7105	16.8821	13.919	12.7054	10.5836
Hmt4-20	FBgn0025639	30.4563	28.6875	19.882	23.9847	23.9949	26.7396
CG13369	FBgn0025640	5.49205	8.08595	10.3512	7.61637	6.87065	5.93823
DAAM	FBgn0025641	16.3182	14.5059	17.2573	13.2779	16.9221	14.788
CycK	FBgn0025674	1.92368	2.5151	2.63806	2.2307	2.35731	2.04397
CkIIalpha-i3	FBgn0025676	2.53304	3.01775	2.86719	1.58691	1.52984	2.31939
CaBP1	FBgn0025678	92.9088	115.352	95.3669	130.29	119.822	128.027
CG3558	FBgn0025681	25.9183	29.9034	15.2238	13.7813	10.7866	7.49485
scf	FBgn0025682	365.458	295.615	218.839	248.43	266.556	249.97
CG3164	FBgn0025683	3.88567	3.84918	6.04544	4.80514	3.2731	1.75128
MFS18	FBgn0025684	0.67828	2.01397	3.87569	5.06241	2.41679	3.21979
Amnionless	FBgn0025686	4.52832	5.09175	5.51802	10.7102	28.1692	31.3075
LKRSDH	FBgn0025687	77.218	79.2291	79.9997	59.9584	51.5467	42.3681
ZnT41F	FBgn0025693	25.9477	26.4089	22.9666	24.3286	22.2289	15.8561
CG5885	FBgn0025700	24.5659	29.7051	36.3354	56.2386	41.5347	43.6512
Bap55	FBgn0025716	9.87351	10.5632	10.7828	12.4199	7.93254	13.9182
Ate1	FBgn0025720	26.3313	25.8371	27.3274	15.0809	26.2602	23.3099
beta'COP	FBgn0025724	19.194	19.3564	19.8348	22.9376	18.6394	24.6398
alphaCOP	FBgn0025725	13.2263	15.0594	16.9828	19.2457	15.4725	15.6735
unc-13	FBgn0025726	5.06768	4.67963	4.29943	5.23936	5.53259	4.65813
pon	FBgn0025739	1.85151	2.85873	1.43036	1.79647	1.91946	2.21893
PlexB	FBgn0025740	26.8181	24.8438	25.7157	24.6352	25.1924	24.9259
PlexA	FBgn0025741	99.637	89.9289	91.9021	100.91	92.9534	92.3577
mtm	FBgn0025742	7.90394	5.80421	10.3308	11.3646	6.81167	4.55813
mbt	FBgn0025743	2.76956	4.00155	2.62632	2.90719	3.76934	2.39793
homer	FBgn0025777	13.0683	16.3474	11.0608	11.1847	11.1906	8.54105
Cdc16	FBgn0025781	4.30935	3.05405	6.94933	6.99596	3.61527	5.30352
TBPH	FBgn0025790	6.39714	8.24806	8.39358	6.53828	6.69257	6.9779
Smox	FBgn0025800	40.4991	44.4061	35.6381	36.0336	53.7111	50.9873
Sbf	FBgn0025802	9.91277	7.45124	8.46053	7.94069	5.10601	5.4108
Rap2l	FBgn0025806	21.102	20.5789	15.4511	14.4388	15.626	16.0419
Rad9	FBgn0025807	2.71384	1.68368	1.29322	1.93676	2.59771	4.21317
Rad17	FBgn0025808	5.75887	7.10005	4.00308	3.69266	5.88514	3.40217
Paf-AHalpha	FBgn0025809	22.1136	16.264	14.5274	14.7147	11.4189	16.8052
Mgstl	FBgn0025814	2.11683	0.931162	1.57242	1.80753	1.97542	2.40292
Mcm6	FBgn0025815	3.76287	3.84955	5.69285	4.48498	3.9596	5.15611
IntS8	FBgn0025830	3.07111	4.97594	5.30126	4.81001	3.90315	4.26389
Fen1	FBgn0025832	2.09686	0.999242	4.67277	3.56328	1.92714	2.43795
RhoGAP1A	FBgn0025836	16.4442	12.6849	15.6815	14.5264	13.3743	15.7149
ND-B14,5A	FBgn0025839	4.17726	2.21814	5.31935	2.84598	2.76419	3.20227
Crag	FBgn0025864	15.4771	15.9507	14.634	16.4593	16.3106	17.6441
Cortactin	FBgn0025865	56.5315	55.022	39.1893	46.9685	37.677	33.7181
CalpB	FBgn0025866	9.69017	8.37643	9.47464	6.02221	7.92827	6.91305
Meics	FBgn0025874	5.16332	5.11035	6.26943	5.34782	5.14693	4.17384
Inos	FBgn0025885	57.4209	86.1811	127.456	54.1138	57.0699	35.2198
Eph	FBgn0025936	19.4841	17.4213	22.1077	21.5678	20.3808	23.2793
Top3beta	FBgn0026015	1.1981	1.29507	1.99702	2.42684	1.77255	1.54197
Rlip	FBgn0026056	6.96166	3.22639	5.05761	3.64846	4.21858	3.24996
Mhcl	FBgn0026059	7.05822	6.07408	3.93064	5.24388	4.97093	4.12361
UBL3	FBgn0026076	35.9107	38.7935	22.4034	22.0672	29.9738	35.927
Nsun2	FBgn0026079	1.37932	1.74655	3.33722	4.2774	2.34701	3.41885
Tip60	FBgn0026080	2.43484	2.16843	2.72779	2.33028	3.03748	2.60601
tyf	FBgn0026083	25.8085	27.3851	23.8209	20.8346	27.9541	26.7379
cib	FBgn0026084	772.375	550.16	403.498	541.14	399.824	314.164
dgt4	FBgn0026085	1.3122	1.00051	0.129964	1.51056	1.35071	3.59899
Adar	FBgn0026086	11.1184	15.0777	11.6328	13.4466	15.4399	14.5372
CG14818	FBgn0026088	4.66044	5.33015	3.00029	2.29926	2.56993	2.77874
CG14817	FBgn0026089	3.87357	2.69404	2.17747	1.97992	3.92566	3.74526
CG14812	FBgn0026090	17.1735	9.09958	12.1324	10.0724	10.1986	7.41114
CDC45L	FBgn0026143	3.91528	2.79869	2.84372	4.25674	3.07061	3.38495
CG16833	FBgn0026147	2.92248	3.04349	4.13589	4.02923	3.59822	4.56279
BCL7-like	FBgn0026149	11.9237	15.6397	11.6949	16.5628	16.789	13.2525
ApepP	FBgn0026150	101.857	67.1502	72.3293	45.1313	56.8953	58.8434
tna	FBgn0026160	38.8773	38.1411	18.1433	32.894	52.8995	34.043
siz	FBgn0026179	2.23441	2.57931	3.36077	4.53042	5.73976	7.21152
Rok	FBgn0026181	7.13402	7.56999	6.18089	6.86336	7.49393	6.61367
prominin-like	FBgn0026189	39.7171	34.7868	20.8871	22.5549	31.0302	28.9189
PH4alphaMP	FBgn0026190	2.20063	5.85316	3.80156	2.0199	0.112884	2.88357
par-6	FBgn0026192	42.154	43.87	33.3186	39.729	36.3305	39.1498
nop5	FBgn0026196	45.6344	47.0884	83.897	72.7754	79.9169	115.552
noe	FBgn0026197	3.84494	2.19873	2.9989	3.24058	2.33226	1.46147
myo	FBgn0026199	44.6046	41.2983	46.0153	41.2637	41.9706	42.0184
mei-P26	FBgn0026206	11.8425	13.3321	8.54428	8.69432	13.7742	12.0155
mbo	FBgn0026207	6.23087	7.02967	5.40911	6.60487	5.79553	5.33766
gus	FBgn0026238	43.2394	43.5955	44.0328	47.0187	45.9423	37.3329
gukh	FBgn0026239	2.07669	1.78849	1.52402	2.3865	2.27652	1.89087
eIF-1A	FBgn0026250	557.064	566.313	400.487	332.442	513.271	509.534
msk	FBgn0026252	43.0867	40.3155	52.9712	41.0613	50.4023	53.4512
cav	FBgn0026257	2.11528	3.15846	3.49172	2.39639	2.79946	4.20405
eIF5B	FBgn0026259	12.3179	12.9577	16.191	14.6182	13.5369	16.1929
bonsai	FBgn0026261	12.5672	8.84284	13.2734	10.0106	11.3695	18.0887
bip2	FBgn0026262	52.9587	48.9286	47.3904	40.9318	43.1579	55.5127
bip1	FBgn0026263	2.74897	2.83833	3.55458	3.30684	2.91947	3.77891
aft	FBgn0026309	8.19974	6.6051	9.70839	11.4312	8.21697	7.81747
X11L	FBgn0026313	9.12802	8.76398	9.13238	8.03184	10.2156	9.29341
Ugt35a	FBgn0026315	3.1907	1.46896	6.50777	1.60083	1.37179	2.36997
Ubc10	FBgn0026316	15.908	7.58084	15.7557	10.7815	7.54944	10.261
Tsc1	FBgn0026317	2.843	2.40331	3.78294	3.86226	3.76255	3.62606
Tak1	FBgn0026323	7.64954	9.95769	10.2026	8.33967	9.89195	12.4151
Taf10b	FBgn0026324	2.2359	6.39301	3.32175	1.13138	3.03497	4.15323
Mad1	FBgn0026326	7.54256	4.12127	10.3255	9.70882	6.22797	5.50963
Sep5	FBgn0026361	2.74573	0.846647	0.799836	1.68221	2.01879	2.21492
Sara	FBgn0026369	8.00373	6.31713	8.63931	7.98651	6.52837	8.53767
SRPK	FBgn0026370	27.4865	26.6941	21.5927	21.9006	22.2802	23.4478
SAK	FBgn0026371	3.74291	5.14674	4.92391	4.95714	4.15946	5.95398
RpL23A	FBgn0026372	803.421	797.577	1145.71	911.23	889.52	880.317
RpII33	FBgn0026373	6.55344	2.83908	6.78574	10.0425	6.78957	12.5215
Rhp	FBgn0026374	2.43068	0.977335	2.31337	1.4053	1.17282	1.12092
RhoGAPp190	FBgn0026375	13.8339	14.1339	9.61569	8.42166	10.9296	8.87385
Rgl	FBgn0026376	1.99636	3.12945	1.56099	1.35354	3.47642	1.94209
Rep	FBgn0026378	1.90328	3.79504	1.71143	2.3063	2.4305	0.940698
Pten	FBgn0026379	18.6239	13.3566	16.2997	13.7975	13.7949	18.0858
Prosbeta3	FBgn0026380	15.596	10.8469	25.3618	18.1095	13.1327	16.0219
Or43b	FBgn0026393	1.22782	1.46277	1.11473	2.01918	0.827523	1.40315
Noa36	FBgn0026400	4.82425	8.83285	9.30466	7.65522	9.14757	8.78063
Nipped-B	FBgn0026401	35.6645	41.4461	40.5967	41.6931	43.8761	45.3874
NiPp1	FBgn0026402	2.57032	2.9601	2.43965	1.93736	1.6536	3.76747
Dronc	FBgn0026404	5.44913	7.24354	7.03026	7.15325	5.69339	4.87349
Mpcp	FBgn0026409	235.744	214.512	317.892	220.778	262.501	329.68
Idgf4	FBgn0026415	3.62366	1.35143	4.36918	5.00917	1.67966	2.81814
Hus1-like	FBgn0026417	2.9661	4.59378	5.26338	3.92935	5.36117	6.41084
Hsc70Cb	FBgn0026418	53.5373	49.6673	45.1664	41.108	54.1739	51.6249
Su(var)2-HP2	FBgn0026427	15.9887	14.3062	17.9263	14.7094	17.0966	21.1732
Grip84	FBgn0026430	1.33663	1.23645	2.42962	1.56454	2.15049	1.08292
Grip75	FBgn0026431	3.23902	4.82353	3.74268	2.62633	3.07608	4.1441
Grip163	FBgn0026432	2.04174	4.02096	3.86899	3.04932	3.01002	3.40987
Grip128	FBgn0026433	5.25258	9.28773	4.39457	4.88728	7.68324	8.43114
ear	FBgn0026441	10.9889	10.0475	7.6425	7.3676	9.4291	11.8368
Drp1	FBgn0026479	12.4928	14.8834	14.2691	16.6788	10.7409	10.8728
Dek	FBgn0026533	24.9983	24.3247	21.3356	21.7035	26.5431	27.5618
SPARC	FBgn0026562	40.0982	53.5419	60.5246	15.8921	17.247	3.37105
CG1307	FBgn0026566	7.90886	13.5457	16.0541	12.8775	14.0768	14.637
CG5704	FBgn0026570	6.27659	6.08894	4.66238	7.24997	5.52133	3.74236
ADD1	FBgn0026573	11.8482	12.0958	9.67079	8.29191	9.29674	11.3086
hang	FBgn0026575	28.9618	26.0369	17.9945	16.2406	25.565	23.081
CG5991	FBgn0026576	1.14118	1.8925	2.17009	0.863282	0.604117	1.34723
CG8677	FBgn0026577	14.0965	11.5609	11.0477	9.89205	12.2615	11.069
Axn	FBgn0026597	7.30338	6.93312	6.20011	6.29126	5.94513	7.63778
Apc2	FBgn0026598	1.79673	1.51784	3.80173	2.73092	2.07164	0.900853
Ady43A	FBgn0026602	2.44834	1.37508	2.14344	2.19292	2.50733	1.13395
Taz	FBgn0026619	1.01898	2.34349	2.36949	1.89431	2.93166	1.98116
tacc	FBgn0026620	24.8731	31.7233	25.6812	21.8089	26.6495	29.4722
nes	FBgn0026630	6.40214	6.48797	7.22376	8.52939	7.90981	7.79147
ldlCp	FBgn0026634	3.48206	3.56227	3.9866	3.86133	1.5502	2.62852
IntS4	FBgn0026679	2.61214	1.70828	2.6009	2.9476	1.44043	2.65929
l(1)G0007	FBgn0026713	1.37492	2.27064	1.69046	1.53988	1.56865	1.5901
fat-spondin	FBgn0026721	42.5346	44.7302	22.5476	11.0395	6.6524	0.31324
drosha	FBgn0026722	3.03092	4.1405	4.80304	4.50443	3.76364	2.61033
CG6171	FBgn0026737	10.7766	7.01546	10.2922	6.64588	6.5793	11.1871
CG7857	FBgn0026738	1.71714	2.00853	3.4787	3.08059	2.41027	1.67535
mRpL18	FBgn0026741	21.606	38.7036	34.8058	26.7557	33.7333	37.8322
Yippee	FBgn0026749	10.4286	12.1402	8.52125	9.86131	10.8442	10.0598
XRCC1	FBgn0026751	8.2236	6.70962	6.54058	5.63496	6.68766	8.28351
Vha13	FBgn0026753	45.3491	76.9518	46.4324	30.1502	41.0026	39.0969
Trap1	FBgn0026761	2.64305	6.6125	6.52511	5.36927	3.85801	5.6315
Rad23	FBgn0026777	30.458	31.6557	43.7672	39.1491	32.1763	40.7119
Nhe1	FBgn0026787	2.18985	4.15624	2.46805	4.31531	2.70661	5.30151
Thd1	FBgn0026869	48.7413	40.653	39.5421	31.4494	40.2073	38.9128
MED18	FBgn0026873	0.779434	1.43267	1.81965	2.92982	2.70165	1.39419
CG11403	FBgn0026876	0.466582	1.19114	1.68342	1.01394	1.17618	1.8182
CG4325	FBgn0026878	3.11389	0.921041	6.54037	5.47402	7.2237	6.05004
CG13364	FBgn0026879	8.46185	14.2321	9.61332	6.13928	11.2537	8.23571
STUB1	FBgn0027052	5.35507	5.60702	6.61108	8.0003	4.82458	6.61067
CSN5	FBgn0027053	24.6427	25.2135	22.0139	20.1965	16.1645	24.0561
CSN4	FBgn0027054	16.7407	19.7286	32.6848	27.67	18.8371	27.1119
CSN3	FBgn0027055	17.2669	12.0555	15.6812	17.6884	12.2104	22.5742
CSN1b	FBgn0027057	11.5985	9.47517	8.09947	9.8886	9.01901	8.60454
Eb1	FBgn0027066	92.2006	82.5666	98.714	111.692	92.6084	85.8237
ValRS	FBgn0027079	7.02891	7.30448	7.96812	9.47018	6.78687	9.59367
TyrRS	FBgn0027080	14.5208	17.1828	15.1089	14.7572	16.1345	23.7362
ThrRS	FBgn0027081	18.9572	27.6247	26.3354	31.5037	28.7567	36.4969
LysRS	FBgn0027084	9.52106	6.25889	16.0393	16.7061	10.8755	18.7032
LeuRS-m	FBgn0027085	1.62652	1.687	1.99	1.10141	1.30142	2.53859
IleRS	FBgn0027086	18.7987	10.8772	26.5703	23.7042	19.5066	22.1594
HisRS	FBgn0027087	4.44224	4.81117	6.14959	5.2023	4.52806	3.58168
GlyRS	FBgn0027088	10.1046	9.08953	17.0359	18.5467	15.151	18.4129
GlnRS	FBgn0027090	12.9467	12.8441	16.145	18.3878	11.769	19.2633
CysRS	FBgn0027091	5.33997	4.99589	8.1666	6.39256	6.66876	6.28587
ArgRS	FBgn0027093	12.9023	12.9634	23.7256	19.4746	16.2694	24.0065
AlaRS	FBgn0027094	15.0228	14.2761	22.71	26.9206	23.4151	26.0073
Manf	FBgn0027095	111.895	87.4619	71.2919	79.1032	106.098	109.736
Dyrk3	FBgn0027101	48.8774	46.4044	34.3095	32.955	35.2779	33.3762
Inx2	FBgn0027108	3.39214	2.99011	2.53281	6.80687	5.38873	2.81373
Kmn1	FBgn0027259	15.1875	12.9176	11.1388	6.48117	13.8876	9.19869
l(1)G0196	FBgn0027279	12.8272	9.76482	13.9074	9.34381	9.9767	11.6449
l(1)G0193	FBgn0027280	13.3732	12.5696	10.568	7.69741	6.49582	6.03114
Gmap	FBgn0027287	10.2953	8.99338	11.5709	15.116	14.7625	17.372
l(1)G0156	FBgn0027291	63.4476	61.6489	44.2737	40.7652	58.7664	69.6416
temp	FBgn0027296	4.76458	5.09276	6.28461	6.62719	7.26821	3.66388
Tcp-1zeta	FBgn0027329	57.6693	53.5324	68.1986	70.0175	56.4797	53.2785
l(1)G0020	FBgn0027330	2.63757	3.72837	4.22668	4.65433	4.31432	5.48652
l(1)G0004	FBgn0027334	1.81538	3.74878	1.19866	1.49271	2.6695	0.8118
Rip11	FBgn0027335	45.0745	47.0905	22.297	15.8027	31.5749	17.144
Kap-alpha3	FBgn0027338	43.6394	39.3828	52.5048	50.3301	37.5692	43.1456
jim	FBgn0027339	12.749	8.7899	7.69045	10.4719	11.1576	12.1446
fz4	FBgn0027342	3.1394	4.5583	4.2632	3.4486	2.73201	2.12775
Amph	FBgn0027356	5.2891	4.63998	5.75934	5.60925	7.68922	10.267
Tim8	FBgn0027359	6.32824	7.59949	16.9227	9.67844	9.21258	15.6208
Stam	FBgn0027363	18.46	20.9872	17.6482	18.5643	12.9151	13.3407
RecQ5	FBgn0027375	9.24776	7.62316	10.2563	8.72668	8.55132	10.9663
MRG15	FBgn0027378	3.63335	2.09596	2.46218	2.88274	3.09322	1.65327
Dnz1	FBgn0027453	4.34879	5.36935	5.72656	7.7612	6.97622	2.20988
wdb	FBgn0027492	67.0499	54.4667	38.9363	39.1276	51.2178	57.9637
AdSS	FBgn0027493	14.2178	18.7029	20.3891	22.8538	25.8618	26.4472
Smyd4-4	FBgn0027495	13.7038	14.6378	16.8308	18.6308	12.7091	24.0944
epsilonCOP	FBgn0027496	13.9462	20.4363	28.4886	26.7334	18.0725	20.6583
Madm	FBgn0027497	9.40874	8.4167	6.37593	4.36589	6.43229	4.65029
wde	FBgn0027499	21.9567	12.3348	19.0061	18.4945	16.253	22.8302
spd-2	FBgn0027500	0.992946	0.784484	1.39752	1.52549	1.06627	1.61252
CG11970	FBgn0027503	6.28706	4.96068	5.43576	4.11026	4.66044	6.65223
CG8878	FBgn0027504	8.02828	4.55722	6.84056	5.78589	6.61458	5.87085
Rab3-GAP	FBgn0027505	1.99733	1.93535	3.62672	3.46714	1.81119	1.66725
EDTP	FBgn0027506	7.97792	3.75812	5.94886	6.28346	5.46121	7.92793
CG1344	FBgn0027507	18.2782	20.0383	24.8568	19.9614	19.497	21.2035
Tnks	FBgn0027508	2.00146	2.86134	2.71262	2.80061	2.88505	1.52309
TBCD	FBgn0027509	7.61166	11.1636	7.3924	7.04871	6.3843	4.274
CG10254	FBgn0027512	3.58215	3.34106	5.35024	5.30813	4.45768	5.17394
CG1024	FBgn0027514	1.39071	1.22351	1.80121	1.46606	1.76974	2.83841
CG7115	FBgn0027515	2.7823	5.0089	2.70464	2.73969	3.561	3.44073
CG7609	FBgn0027518	3.81413	3.87301	3.65405	4.16208	3.85268	3.57061
CG3909	FBgn0027524	2.01022	0.374852	3.6357	3.73705	3.37372	2.65771
LTV1	FBgn0027525	10.7374	7.01926	11.9981	8.6026	6.93314	10.547
Ublcp1	FBgn0027526	12.5803	12.0283	22.6183	15.2859	15.5536	10.1047
tapas	FBgn0027529	5.14164	4.41642	5.65824	5.65442	4.97049	6.96395
CG7139	FBgn0027532	7.69785	8.84943	13.4405	12.507	7.43946	10.4571
botv	FBgn0027535	5.89961	6.22073	7.73355	6.54119	5.94712	4.79888
Nup93-1	FBgn0027537	6.11913	5.23896	9.34763	9.09654	9.22691	8.78107
beta4GalNAcTA	FBgn0027538	7.73828	6.93272	5.59486	5.55692	6.88435	7.56675
lili	FBgn0027539	2.89185	3.4047	4.49843	4.53192	6.56629	6.32898
CG1927	FBgn0027547	7.23942	8.09974	6.89734	6.0174	9.37269	6.40428
nito	FBgn0027548	9.16883	10.9541	12.0228	10.3531	12.7231	12.4159
CG7927	FBgn0027549	9.33237	9.57351	10.1603	11.8619	9.93885	8.05979
CG10863	FBgn0027552	7.42932	9.35673	8.27797	3.99984	7.02307	4.50876
NELF-B	FBgn0027553	2.63938	2.16503	2.63554	2.95298	2.72002	1.89619
CG8042	FBgn0027554	5.18589	3.54853	3.02907	4.44639	2.78636	5.27232
pgant3	FBgn0027558	3.43985	3.00791	3.96923	4.36626	2.9834	4.42055
Pol32	FBgn0027559	7.51859	6.39367	5.68125	6.34213	2.57339	4.63747
CG18659	FBgn0027561	21.6372	17.3706	14.8228	9.27997	12.9623	10.5325
CG3149	FBgn0027564	2.5271	1.97682	3.18766	3.76381	1.57758	2.8998
CG5498	FBgn0027565	5.24899	5.78629	7.6102	4.36804	5.8587	6.50441
CG8108	FBgn0027567	31.9732	30.11	19.7429	19.724	26.8921	24.4521
Cand1	FBgn0027568	10.9641	11.1627	11.3222	10.4186	8.48244	10.3913
cert	FBgn0027569	19.2299	18.3278	30.197	16.0305	17.6918	19.9313
FASN1	FBgn0027571	8.43754	8.23591	15.088	8.88518	9.52419	13.7526
CG5009	FBgn0027572	2.84412	2.80226	2.05557	2.59143	2.37372	1.20309
CG5815	FBgn0027574	4.35136	3.34968	3.72955	4.91969	3.9684	3.36781
CG14526	FBgn0027578	5.39003	2.96375	4.80459	0.579571	0.640178	0.148327
mino	FBgn0027579	5.17378	4.24164	8.19638	7.23819	4.19162	4.45179
CG6230	FBgn0027582	8.16914	9.96042	12.8639	16.9119	11.1944	9.53583
CG7601	FBgn0027583	3.00505	0.771095	2.28945	2.40758	2.54937	1.37826
CG7028	FBgn0027587	11.5891	11.5462	13.3813	8.81335	10.1986	9.21022
GCS2alpha	FBgn0027588	50.1308	55.1237	56.9687	46.0547	45.6205	40.3113
GstE12	FBgn0027590	30.5207	38.9054	90.276	65.0909	35.18	51.9434
MED15	FBgn0027592	4.71918	7.59663	9.71603	12.1301	7.4996	8.14219
drpr	FBgn0027594	20.7129	20.841	13.5059	6.85917	8.12812	3.98382
CG17712	FBgn0027597	3.08532	2.87665	2.69042	3.63996	1.10958	1.91958
cindr	FBgn0027598	32.911	39.7551	24.094	15.6117	21.623	13.2112
CG2790	FBgn0027599	5.0981	3.84012	3.09473	2.79465	5.01797	2.6965
pdgy	FBgn0027601	11.1453	11.3359	15.4871	24.8943	15.533	19.2664
CG8611	FBgn0027602	2.27518	2.94288	2.34997	1.99551	2.36584	2.3449
Ulp1	FBgn0027603	21.1446	24.7942	27.5875	26.3317	24.6529	28.2175
Vps4	FBgn0027605	13.7023	15.4772	16.0242	14.5845	14.1426	10.5756
CG8230	FBgn0027607	9.10861	10.3977	14.9213	13.2137	10.9241	14.4033
morgue	FBgn0027609	1.81728	1.33838	1.88169	1.08675	2.00422	1.18204
Dic1	FBgn0027610	2.10162	1.9786	2.20842	3.7512	1.7525	2.2922
LManII	FBgn0027611	381.843	355.666	321.393	376.8	470.625	372.353
CG6404	FBgn0027615	2.01542	5.156	2.7578	2.52941	3.10015	4.60114
YT521-B	FBgn0027616	8.59364	11.1688	9.90691	8.94749	9.13919	9.4825
CG5808	FBgn0027617	8.67455	8.22264	4.13233	4.18661	5.45938	6.15594
Adam	FBgn0027619	67.202	60.1092	79.2615	63.5666	75.2062	76.1555
Acf	FBgn0027620	10.6575	7.64524	10.7339	7.23514	10.3108	11.533
Pfrx	FBgn0027621	7.22935	8.42373	6.599	6.57799	7.92305	7.72229
jdp	FBgn0027654	7.25243	6.19567	5.05876	8.18148	10.8272	5.81393
htt	FBgn0027655	4.71193	4.04409	3.56616	3.53551	3.36936	3.39013
glob1	FBgn0027657	6.73789	5.50438	12.7807	9.10194	10.8148	10.6533
blot	FBgn0027660	37.7434	37.8281	22.2053	29.8128	26.9427	21.3434
VhaSFD	FBgn0027779	31.7308	31.4427	28.0213	20.3521	27.7106	23.1415
U26	FBgn0027780	4.43283	2.64722	3.91801	2.3992	2.59913	1.70626
SMC2	FBgn0027783	5.82071	5.07496	9.50059	5.88073	7.74369	9.26775
Prp18	FBgn0027784	3.17606	1.26714	0.768124	2.30788	1.6292	1.51936
NP15,6	FBgn0027785	39.8343	47.386	31.1354	31.6543	30.982	37.4873
Mtch	FBgn0027786	10.1385	13.3017	18.0174	14.457	17.126	15.8394
O-fut2	FBgn0027791	2.41674	1.3483	3.5904	3.10195	3.38044	1.15979
Lrpprc2	FBgn0027794	0.683495	1.22143	2.28471	1.94362	1.97874	2.72534
Dp1	FBgn0027835	191.677	168.391	130.45	141.421	200.211	227.28
Dgp-1	FBgn0027836	1.55714	1.6696	2.16877	2.9342	1.71733	1.47969
CstF-64	FBgn0027841	4.7292	3.61856	4.0572	4.21725	3.89341	5.24233
Ogg1	FBgn0027864	8.32722	4.95156	8.97737	6.66537	7.72094	7.90889
Tsp96F	FBgn0027865	68.8875	80.3602	49.7799	58.3729	63.2005	48.34
CG9776	FBgn0027866	16.7987	17.9392	17.097	15.6534	14.8364	20.2411
Nup107	FBgn0027868	3.26374	3.24586	3.53115	3.26705	3.32561	5.39373
rdgBbeta	FBgn0027872	2.36956	2.39124	1.65662	2.00571	1.8447	6.23307
Cpsf100	FBgn0027873	3.2092	3.51178	2.7076	2.93201	2.14108	1.80715
Aac11	FBgn0027885	38.8319	39.1015	45.931	40.9194	42.1784	51.1659
ball	FBgn0027889	3.4687	4.00791	5.01205	4.76665	4.82121	5.3546
NimB1	FBgn0027929	23.3878	19.3351	41.4063	19.108	19.8603	14.7689
MP1	FBgn0027930	30.8597	30.7628	34.2652	13.5614	14.0684	11.4086
Akap200	FBgn0027932	293.336	221.589	77.0931	106.732	154.683	137.626
ppl	FBgn0027945	94.8175	75.8856	39.9064	40.5663	46.2664	34.265
msps	FBgn0027948	40.5059	32.1834	36.7813	29.5083	30.0058	34.1273
msb1l	FBgn0027949	10.7879	18.1444	14.5605	14.0305	16.4079	23.837
MBD-like	FBgn0027950	7.54801	10.2288	7.59256	5.04273	4.94266	5.69586
MTA1-like	FBgn0027951	36.7107	39.0905	31.6218	29.8586	43.2395	45.5613
ric8a	FBgn0028292	5.09144	4.58985	2.60165	3.2532	3.5408	4.00251
l(1)G0334	FBgn0028325	9.17933	10.4344	7.78317	8.87327	8.19766	10.7326
l(1)G0320	FBgn0028327	558.661	549.082	452.617	540.233	762.811	810.559
l(1)G0289	FBgn0028331	264.765	290.016	109.458	41.9677	66.6902	13.6129
l(1)G0255	FBgn0028336	16.044	20.1993	25.9116	22.4696	15.1259	18.6076
Ptpmeg2	FBgn0028341	14.9927	12.3613	7.35757	12.5282	11.2223	7.69678
ATPsyndelta	FBgn0028342	29.1445	24.783	23.8047	14.8974	23.4043	25.6144
Ankle2	FBgn0028343	3.61184	2.53117	2.87584	3.57162	3.0982	1.90017
Cdc7	FBgn0028360	8.97043	11.1825	10.1911	6.53379	8.90049	9.29979
kirre	FBgn0028369	0.306621	0.701366	0.564855	1.22027	3.1111	2.70939
isopeptidase-T-3	FBgn0028372	2.50745	2.47768	2.30084	2.42563	1.58604	2.30853
heix	FBgn0028375	5.96973	3.43139	6.90309	6.52804	6.21053	5.97208
fal	FBgn0028380	3.99841	2.52931	6.78129	5.61535	4.87803	3.00639
cyp33	FBgn0028382	1.95367	2.23441	2.90245	3.7751	0.646393	3.58193
chm	FBgn0028387	3.21143	2.85499	2.56593	2.79596	2.0834	2.84804
CG17834	FBgn0028394	1.02347	1.04513	1.4662	1.26234	1.08844	0.751895
TotA	FBgn0028396	6.82029	2.85379	2.71847	2.59886	3.66922	2.52918
Taf10	FBgn0028398	9.28345	10.7834	4.95645	2.1469	6.23905	3.76218
TMS1	FBgn0028399	18.8053	29.8457	26.8852	29.9397	16.2913	16.965
Sin	FBgn0028402	2.82096	1.56379	2.73694	3.17166	2.22226	2.47147
Drep4	FBgn0028406	1.43621	1.86075	2.86715	3.46901	2.77192	2.04715
Drep2	FBgn0028408	0.865195	1.19701	0.767075	1.14745	1.46208	1.7348
Kap3	FBgn0028421	3.12413	2.01812	2.75042	2.32148	2.1694	2.19388
JhI-21	FBgn0028425	1.91167	3.54706	3.3839	6.65547	2.7812	4.43801
JhI-1	FBgn0028426	5.15914	3.86585	6.44885	4.73952	4.82657	4.67777
Ilk	FBgn0028427	8.59033	5.27213	6.63889	5.13709	5.74183	5.39351
I-2	FBgn0028429	23.3791	22.0105	15.4026	11.807	22.068	23.0884
He	FBgn0028430	123.507	246.338	110.135	101.791	153.575	73.3415
Ercc1	FBgn0028434	5.57618	2.17414	3.4643	2.08412	1.00633	1.90417
CG11070	FBgn0028467	3.80605	3.2891	4.64169	5.32494	2.38072	2.81972
rtet	FBgn0028468	3.02036	2.39888	3.90549	3.58731	2.83757	2.15102
Nab2	FBgn0028471	2.84256	2.84071	4.26402	3.35849	3.28716	2.81378
Non1	FBgn0028473	33.8121	24.6836	62.3664	51.0116	23.6157	28.8398
CG4119	FBgn0028474	5.6436	5.74773	4.45187	4.64051	4.8196	4.35507
Hrd3	FBgn0028475	3.15598	6.14116	6.03446	5.98301	4.67308	7.18713
Usp1	FBgn0028476	2.55995	3.74233	5.77624	6.67886	4.3517	4.37247
Mtpalpha	FBgn0028479	17.0205	16.1265	26.3771	33.0947	22.6361	32.385
CG17841	FBgn0028480	3.44538	3.59735	3.91084	4.99754	4.52562	2.94292
Ack	FBgn0028484	2.14863	3.8867	2.70351	2.97461	3.04671	3.19622
f-cup	FBgn0028487	3.43887	0.975458	2.35173	1.68313	1.56521	1.12284
CG31705	FBgn0028490	47.8438	40.9595	37.328	29.5553	18.0504	15.418
CG6424	FBgn0028494	7.03395	5.3808	3.7583	4.31244	5.98828	4.30429
CG3530	FBgn0028497	4.24539	3.79799	4.64329	3.44799	2.90119	1.79363
Rich	FBgn0028500	2.4742	1.89593	2.97003	3.71082	1.94285	1.77026
CG4455	FBgn0028506	8.69868	12.7062	13.3913	18.4516	19.8822	19.0548
CG3793	FBgn0028507	14.5748	15.053	14.8195	12.7134	13.5072	14.522
CenG1A	FBgn0028509	6.33373	4.2581	3.01215	4.29327	3.97746	1.81333
CG9254	FBgn0028513	9.15114	5.64192	6.20286	6.77217	5.74013	3.27377
CG4793	FBgn0028514	62.0679	63.0619	70.9895	44.8558	47.4482	25.1549
EndoGI	FBgn0028515	14.2949	17.2574	19.7269	13.7393	12.3321	15.9668
CG18478	FBgn0028517	10.2399	12.755	26.5094	2.25085	4.02533	2.44822
CG5888	FBgn0028523	10.6904	6.94694	15.9581	7.94911	7.22074	5.26087
mTTF	FBgn0028530	4.63767	8.64801	11.1836	7.79256	10.9708	9.55787
Sec71	FBgn0028538	4.05592	4.23642	6.29618	5.09102	4.03497	3.43498
CG31731	FBgn0028539	19.7585	17.4927	19.3863	16.9458	15.7165	14.1337
TM9SF4	FBgn0028541	11.1508	10.1118	14.6361	11.157	8.67621	9.58557
NimB4	FBgn0028542	13.4894	23.0114	21.6863	7.2338	6.18082	1.98159
NimB2	FBgn0028543	4.89969	6.14113	6.58117	3.91844	6.66212	3.12149
ics	FBgn0028546	41.991	38.3913	14.0758	10.2799	24.6702	21.8612
Atf3	FBgn0028550	12.3942	17.6603	6.96612	4.76871	11.2348	5.55472
gammaSnap1	FBgn0028552	2.75927	1.10945	1.92154	1.48893	1.71175	2.85337
x16	FBgn0028554	15.2531	16.7978	13.8526	16.2205	19.9133	18.9443
sut1	FBgn0028563	2.99489	5.53751	8.30542	6.69823	4.84437	6.10701
qtc	FBgn0028572	0.837294	2.62572	2.52796	1.35474	1.60855	2.17406
hfp	FBgn0028577	17.8708	13.1854	12.877	9.68757	12.1405	12.8076
phtf	FBgn0028579	16.5723	13.1669	14.6694	15.3361	12.5775	11.3099
lqf	FBgn0028582	39.5543	42.886	28.7015	27.0588	40.8052	33.2622
aralar1	FBgn0028646	5.24944	3.63001	4.23846	4.45716	3.30376	3.49565
CG11902	FBgn0028647	3.14005	1.88542	3.51429	3.14997	2.88589	2.30284
mRpL50	FBgn0028648	2.08532	0.745308	3.67892	3.10786	2.29984	2.68098
VhaPPA1-1	FBgn0028662	40.3928	47.3583	53.659	51.3724	31.27	27.8429
VhaM9,7-b	FBgn0028663	23.8413	21.062	17.8863	13.3514	14.3262	19.9059
VhaAC39-1	FBgn0028665	34.076	35.0386	46.7919	34.0298	30.7646	23.7465
Vha100-2	FBgn0028670	26.306	29.0178	47.0307	23.9655	21.5942	19.3296
Vha100-1	FBgn0028671	11.8015	11.7223	11.7466	15.3867	12.079	12.8334
spt4	FBgn0028683	4.00438	4.82085	1.25243	1.38638	2.78925	1.69643
Rpt5	FBgn0028684	41.5573	35.6299	45.6447	39.8174	37.2796	43.5205
Rpt4	FBgn0028685	43.8516	37.0321	69.1523	70.7635	37.0515	50.8614
Rpt3	FBgn0028686	43.4134	49.2973	68.7351	68.9975	44.3226	54.9128
Rpt1	FBgn0028687	11.8249	20.4498	23.6123	26.8694	14.8643	11.8835
Rpn7	FBgn0028688	25.7211	31.0383	27.4265	42.3558	24.478	27.58
Rpn6	FBgn0028689	46.3504	39.3618	58.4133	48.7396	44.2372	41.9854
Rpn5	FBgn0028690	36.861	33.6799	45.1825	48.9291	28.2218	34.4201
Rpn9	FBgn0028691	22.6018	22.3889	24.2035	28.0184	20.8146	25.7551
Rpn2	FBgn0028692	48.1014	38.8631	29.5659	30.3835	26.3692	38.4757
Rpn12	FBgn0028693	29.6207	31.8291	32.9324	28.6541	26.4759	25.4527
Rpn11	FBgn0028694	111.943	92.7849	117.623	116.369	105.96	110.315
Rpn1	FBgn0028695	23.976	25.2208	38.7253	32.6319	30.3197	32.0373
RpL15	FBgn0028697	1260.9	1193.54	987.578	564.724	1062.13	1180
Rh50	FBgn0028699	2.3964	1.54872	1.46309	0.0809783	0	0
RfC38	FBgn0028700	1.56123	0.858451	4.37122	3.25872	1.85428	4.02779
Nhe3	FBgn0028703	14.258	14.3956	17.411	12.1413	20.4142	13.8113
Mst85C	FBgn0028708	5.79343	7.0589	5.57496	6.55011	7.3333	6.88893
Lnk	FBgn0028717	5.48726	6.35836	5.14869	5.31936	5.1599	5.8891
Fmr1	FBgn0028734	54.1391	45.2725	25.1643	32.4872	40.4788	33.8761
Ef1beta	FBgn0028737	320.049	276.682	615.439	497.372	331.728	423.437
Dhit	FBgn0028743	3.23004	5.10839	2.27937	1.95875	2.89438	2.27495
CG5033	FBgn0028744	8.85002	10.4614	8.1392	6.83599	12.4224	20.6958
CG18508	FBgn0028746	3.18692	3.20615	2.10427	3.68808	3.25441	2.74469
Dak1	FBgn0028833	11.779	16.2669	15.3566	18.1849	13.8745	9.88973
CSN7	FBgn0028836	12.5064	9.86857	14.116	14.4237	9.22518	15.5432
CSN6	FBgn0028837	4.40346	4.57841	6.54196	5.20078	3.44367	5.01236
CG18477	FBgn0028864	4.80605	3.99252	4.24544	0.69424	1.36093	0.464685
GMF	FBgn0028894	104.539	108.643	70.773	47.1761	66.2987	65.8527
CG4935	FBgn0028897	3.3795	6.10285	4.75647	4.46076	3.62907	2.86341
CG33090	FBgn0028916	0.945431	1.82468	1.43968	1.71026	1.5901	1.56428
CG16865	FBgn0028919	4.41473	3.55573	4.98831	2.14736	1.64582	4.28203
NC2beta	FBgn0028926	2.52066	1.70697	2.16804	1.52721	2.48734	1.18652
CG16890	FBgn0028932	2.57989	2.79415	3.01977	1.67136	1.55197	1.32847
NimB5	FBgn0028936	11.8064	14.6086	12.514	7.03971	10.5082	5.31049
CG16886	FBgn0028938	2.05854	1.58466	1.05862	0.130204	0.218298	0.0354053
Kebab	FBgn0028952	2.3219	2.02855	2.36355	1.66172	1.94428	1.96125
CG14478	FBgn0028953	61.0702	48.9303	34.3154	40.4459	43.8831	46.8274
mthl3	FBgn0028956	1.34627	1.31977	2.00007	2.87816	2.07866	0.99764
AlaRS-m	FBgn0028962	2.17478	1.8314	2.12445	2.13118	1.24853	1.8651
A16	FBgn0028965	3.8075	2.92326	1.67602	3.88447	3.03275	2.58549
gammaCOP	FBgn0028968	20.7861	23.4957	31.9726	30.4845	26.3938	26.8993
deltaCOP	FBgn0028969	22.237	22.6531	23.1451	28.7225	25.063	23.4605
betaggt-II	FBgn0028970	1.6131	1.92178	1.89722	1.32639	1.55667	2.76517
xmas-2	FBgn0028974	3.05674	2.87714	5.27458	4.18386	3.45495	5.43369
trbl	FBgn0028978	2.47692	1.68346	3.98144	3.33882	3.26912	1.30737
tant	FBgn0028980	3.60385	4.90286	9.24001	6.0222	4.74385	6.60224
Spt6	FBgn0028982	12.0746	10.4734	10.2572	9.80005	10.9049	11.0505
Spn55B	FBgn0028983	1.85651	5.30823	3.53038	5.80084	4.66828	2.39096
Spn88Ea	FBgn0028984	13.1081	14.5753	17.3101	12.8089	13.9676	9.06151
Spn27A	FBgn0028990	50.1618	46.8635	38.8595	34.2735	29.5454	24.3746
sds22	FBgn0028992	72.6992	74.7461	67.0011	49.4248	55.7793	63.0471
miple2	FBgn0029002	3.19349	2.19144	2.2773	2.94099	0.704402	1.48519
Smurf	FBgn0029006	24.1463	29.0791	30.6451	26.2464	37.0645	44.0419
Dd	FBgn0029067	11.3629	12.7152	11.1914	13.4033	17.0698	15.2014
icln	FBgn0029079	5.09362	5.29598	4.12761	3.33159	3.3195	5.69442
disp	FBgn0029088	3.19475	3.12945	3.77942	4.52414	2.87092	3.31583
ced-6	FBgn0029092	52.7474	46.8402	43.5617	46.7528	51.5653	30.728
cathD	FBgn0029093	113.495	130.397	125.051	144.324	88.7228	111.687
asf1	FBgn0029094	14.7834	13.5408	13.8812	14.7869	13.4103	18.2012
aru	FBgn0029095	4.24964	1.15912	1.49529	0.8276	1.11003	1.70032
Uba2	FBgn0029113	20.0572	17.5593	18.6159	14.724	13.6372	19.1589
Sucb	FBgn0029118	10.7151	9.38051	12.431	12.424	11.2199	14.3209
Sras	FBgn0029121	5.68346	5.09181	4.61582	5.04716	3.76088	4.87974
SoxN	FBgn0029123	0.83732	0	0.21325	1.43601	2.48014	1.71169
Debcl	FBgn0029131	0.614544	1.19805	2.07498	1.28626	1.97167	2.0486
REG	FBgn0029133	24.1579	28.2163	43.4745	39.7282	44.6953	40.764
Prosbeta5	FBgn0029134	23.339	23.0903	20.4774	18.6345	20.1443	24.2012
NtR	FBgn0029147	26.1839	27.5244	25.1705	7.34554	7.92715	3.62747
NHP2	FBgn0029148	17.3886	20.8042	39.7576	24.2356	29.2422	37.9418
Mkrn1	FBgn0029152	30.4911	29.6972	35.8719	33.8316	35.2484	40.2927
Men-b	FBgn0029155	5.78293	5.78313	4.95167	3.09198	3.23604	6.06376
ssh	FBgn0029157	4.54498	4.33175	4.55774	4.39117	4.15622	4.09873
Las	FBgn0029158	2.1045	2.70778	4.1687	2.59567	2.39835	2.76053
Hml	FBgn0029167	934.712	869.874	780.085	164.524	269.066	60.8834
FKBP59	FBgn0029174	87.5763	77.9147	86.8281	47.0589	72.2215	63.7237
Ef1gamma	FBgn0029176	399.583	337.293	509.47	490.319	403.776	408.954
COQ7	FBgn0029502	11.2493	7.65826	12.8925	8.10467	3.66289	11.6899
CHORD	FBgn0029503	5.97608	8.32165	8.07118	8.67909	6.59084	7.35773
CHES-1-like	FBgn0029504	25.0655	32.2608	20.5619	19.6113	30.5284	24.0632
Tsp42Ee	FBgn0029506	22.1862	20.2355	22.3976	72.376	56.6334	58.4087
Aos1	FBgn0029512	5.61223	8.14138	18.0243	12.2154	9.19333	13.2865
312	FBgn0029514	1.19055	0.510614	2.03404	1.32158	1.11607	1.91661
Or1a	FBgn0029521	1.45933	2.78173	1.20447	2.99988	1.2518	1.52269
CG18273	FBgn0029525	3.10553	2.41015	3.46027	3.10075	2.56875	3.74957
	FBgn0029584	704.066	388.22	164.111	200.447	270.857	247.162
CG14806	FBgn0029594	5.67119	4.3241	6.45944	3.80828	5.73338	4.56488
eIF3ga	FBgn0029629	22.2267	23.8654	24.6612	20.7438	22.1343	25.75
CG3603	FBgn0029648	3.12222	1.89365	3.23289	4.3566	3.6521	2.87701
CG12206	FBgn0029662	1.97426	0.957619	2.30453	1.85527	3.03275	1.41887
CG10802	FBgn0029664	5.62714	8.13826	8.06829	4.9498	5.41222	9.88983
CG14270	FBgn0029665	1.74215	2.49062	2.21846	2.55803	1.64688	1.44681
CG10803	FBgn0029666	16.6285	20.5168	12.8332	14.2541	21.0672	16.7857
CG2875	FBgn0029672	6.67101	4.38565	9.25965	5.8857	6.28321	10.2777
HIP-R	FBgn0029676	135.644	148	65.7226	80.8636	136.829	138.519
CG2938	FBgn0029685	10.1605	9.10936	8.29669	12.3599	8.41109	13.9278
CG2941	FBgn0029686	1.87565	2.12429	2.13514	1.9028	1.47757	2.41822
Vap33	FBgn0029687	139.864	137.024	93.1172	96.6538	132.282	139.435
lva	FBgn0029688	10.7828	11.4237	12.3511	11.0678	10.5362	14.1814
CG6379	FBgn0029693	4.9903	3.87643	5.9139	6.5938	3.56306	4.54053
CG12693	FBgn0029705	0.410353	1.50853	2.17728	1.10866	1.87492	1.10101
CG3626	FBgn0029706	2.62101	4.43827	3.17559	4.4777	3.81676	3.32274
CHOp24	FBgn0029709	28.0236	42.0606	30.5227	36.6251	49.8491	49.0974
CG3568	FBgn0029710	12.5159	12.6878	11.4101	3.83587	4.01555	1.78082
Usf	FBgn0029711	12.6486	21.5851	10.8	10.5318	16.0055	9.57387
CG11436	FBgn0029713	1.59239	2.96639	2.72417	2.93615	1.96908	3.58202
CG3527	FBgn0029714	2.48237	1.27759	5.90064	3.34749	4.16135	3.55221
CG11444	FBgn0029715	17.8056	23.6295	30.0245	28.0463	25.1888	15.7903
mRpL30	FBgn0029718	1.38385	1.78055	4.31739	3.07229	1.83145	2.72285
Proc-R	FBgn0029723	1.88555	4.1163	3.02837	2.43038	1.7423	1.66357
CG4041	FBgn0029736	3.43101	3.99484	5.14979	5.0316	2.41861	3.03692
CG6903	FBgn0029737	2.91487	2.38125	2.47455	2.43103	1.97476	1.11726
Usp16-45	FBgn0029763	5.25469	6.90781	5.68295	5.90996	6.83883	5.11372
CG15784	FBgn0029766	4.39872	5.49664	4.9859	6.18892	4.88716	6.23619
CG12730	FBgn0029771	10.2323	12.2267	8.54611	10.0461	18.359	9.37899
RhoGAP5A	FBgn0029778	7.87268	7.19465	4.21943	5.28525	5.60519	4.9911
RpL35	FBgn0029785	447.895	406.315	295.955	172.999	325.057	364.099
CG3160	FBgn0029789	3.32937	2.58601	3.81679	2.58672	2.1106	2.83698
CG15773	FBgn0029795	1.24035	2.15872	3.04448	1.99544	3.03327	2.17041
CG4078	FBgn0029798	1.12275	1.03186	1.58857	1.09904	2.41753	2.10392
CG15771	FBgn0029801	13.4111	12.7662	10.3781	7.20709	11.738	14.0278
GAA1	FBgn0029818	4.43666	5.82381	5.5127	6.59973	5.69374	4.5812
Usp30	FBgn0029819	1.42339	2.88279	2.937	2.73092	1.78784	2.33387
CG16721	FBgn0029820	1.99988	2.24642	2.97111	2.37854	1.57544	1.34146
CG12236	FBgn0029822	9.88724	6.37756	6.78246	6.90719	8.28615	5.5763
CG3011	FBgn0029823	5.24037	5.52314	11.9905	11.7946	7.21377	11.9051
CG12728	FBgn0029825	6.61309	9.51225	12.4165	8.87377	10.157	11.7927
CG6041	FBgn0029826	1.38959	1.11746	2.19345	1.28543	2.10724	0.466047
MCTS1	FBgn0029833	4.487	5.30875	8.96471	5.27978	6.05775	5.81192
raptor	FBgn0029840	1.50642	1.39694	1.85492	1.78547	1.10759	0.873912
Efr	FBgn0029849	0.863591	1.88823	1.7358	2.42268	2.40909	1.31756
CG3781	FBgn0029853	12.2547	18.2436	28.1366	16.3224	22.3394	18.2065
CG3566	FBgn0029854	1.49838	4.11287	3.20551	2.66125	2.31353	3.53784
wuho	FBgn0029857	1.7117	1.97649	2.34735	2.59839	1.59735	1.70751
CG15891	FBgn0029860	1.3942	3.98636	3.62473	2.38832	1.92202	2.70165
CG3815	FBgn0029861	1.81784	1.91717	1.32819	2.05833	2.07058	1.59915
CG3847	FBgn0029867	5.77714	5.67817	6.16885	5.26989	6.57055	6.57966
ND-B16,6	FBgn0029868	4.94903	7.18412	6.56067	5.0711	5.62609	7.8991
Marf	FBgn0029870	11.4237	8.90815	11.8286	9.6779	9.60332	11.0743
CG3918	FBgn0029873	2.45051	6.24504	2.61172	4.29274	4.11265	2.95395
CG3342	FBgn0029874	1.63438	0.725138	0.837277	2.039	1.42958	2.97386
Pat1	FBgn0029878	5.83182	7.15157	6.3921	6.41502	4.17349	4.9144
pigs	FBgn0029881	15.52	15.5499	7.9412	5.62072	7.38083	3.37079
CG3226	FBgn0029882	11.3123	15.2482	18.0864	12.225	11.0501	14.935
CG3224	FBgn0029885	13.0156	12.2971	13.2834	12.6566	14.9787	17.7141
CG3198	FBgn0029887	10.5068	8.62665	8.73551	6.72126	8.16453	9.10378
ND-ASHI	FBgn0029888	4.03635	1.0944	3.51523	2.06003	1.61178	4.48132
Pink1	FBgn0029891	0.773143	0.892747	1.94381	1.27145	1.21342	1.46272
CG3184	FBgn0029892	1.1437	1.1679	0.728196	1.20911	1.62174	2.04576
CG14442	FBgn0029893	7.22082	6.25393	8.20174	6.47145	6.82597	9.56743
CG14440	FBgn0029894	17.2171	13.9122	9.69118	8.61726	13.9954	18.7457
CG3168	FBgn0029896	2.60766	1.38468	2.57347	3.76763	5.0123	4.96423
RpL17	FBgn0029897	51.1274	73.9545	71.865	52.5147	57.3362	91.3757
CG14438	FBgn0029899	10.9662	8.60755	10.8569	8.92286	8.82768	9.0903
pod1	FBgn0029903	66.1154	64.4336	39.5205	48.6827	49.8177	38.0432
Nf-YC	FBgn0029905	5.19387	3.65805	5.27654	4.23932	4.71732	4.50857
xit	FBgn0029906	0.469833	1.42733	2.79201	2.75257	1.03633	1.6808
CG14435	FBgn0029911	6.83839	6.97284	4.48209	5.54026	8.73415	5.4864
CG4557	FBgn0029912	2.05117	1.99744	2.34068	2.56656	2.1966	3.74873
Cht11	FBgn0029913	3.4835	3.40744	2.17904	2.11057	1.75242	1.58508
CG4558	FBgn0029914	4.2807	6.18491	6.83317	7.00226	3.41524	4.03213
CG14434	FBgn0029915	0.57521	1.18782	3.70307	3.25826	1.83266	3.4868
CG4586	FBgn0029924	3.86983	4.18004	3.96054	4.13662	2.70302	1.76897
CG3040	FBgn0029925	1.62027	0.128687	1.87221	1.77638	1.38985	1.12708
CG4593	FBgn0029929	7.80475	8.46037	15.4176	16.5023	10.9724	15.9549
CG12541	FBgn0029930	15.2719	19.4919	9.61858	12.3383	16.6749	17.3372
CG4615	FBgn0029935	4.10062	1.67496	5.72942	3.4922	4.73781	3.23083
CG4617	FBgn0029936	4.02419	1.89246	3.06791	3.2654	3.27022	1.32598
CG8300	FBgn0029937	10.4494	14.9387	8.36945	9.86223	13.0275	5.76982
CG1677	FBgn0029941	16.0559	14.0622	13.816	13.6433	13.719	14.1288
Atg5	FBgn0029943	12.9734	10.9729	15.5402	14.633	11.4614	12.6964
Dok	FBgn0029944	3.81175	5.0545	5.786	5.63258	2.98536	4.71836
CG12155	FBgn0029957	4.58647	4.66157	7.45263	5.4212	4.58407	5.0313
Pdp	FBgn0029958	3.2845	2.79198	3.62672	4.67151	4.89511	3.37419
Rab39	FBgn0029959	13.6322	11.3604	13.3321	7.54791	8.15944	8.39354
CG10932	FBgn0029969	8.78242	5.32157	6.91259	6.98232	10.0066	8.99903
CG1444	FBgn0029975	17.6814	23.0973	20.8971	11.0086	17.1329	12.0244
snz	FBgn0029976	10.0902	11.2255	9.48486	8.44765	8.68001	8.51566
mahe	FBgn0029979	53.2989	49.07	27.4549	40.0859	47.2642	43.8892
CG10778	FBgn0029980	2.32851	2.11839	3.66899	2.72692	3.19061	2.08253
Upf2	FBgn0029992	7.4731	6.34517	6.62195	6.47236	5.91992	5.85243
UbcE2H	FBgn0029996	81.1952	56.7218	49.6617	46.6241	67.9791	63.2576
CG2258	FBgn0029997	10.7035	11.4874	9.61379	9.4567	10.7729	10.1899
CG1575	FBgn0029999	1.09088	2.33933	2.76862	2.98997	1.40362	4.18713
CG2260	FBgn0030000	3.79688	3.71036	5.56939	5.49319	3.71041	6.10381
CG2116	FBgn0030003	1.61177	2.16459	4.28111	3.41365	3.0165	1.74728
CG17982	FBgn0030006	6.29123	7.70924	5.34086	4.61878	4.62561	3.41617
alpha-PheRS	FBgn0030007	12.8119	9.72541	14.4859	14.9164	11.2539	16.4271
CG2129	FBgn0030008	1.00279	1.63842	1.06413	1.2172	1.94858	2.22079
GIIIspla2	FBgn0030013	7.36569	6.15748	5.47138	5.44061	8.81183	7.31333
CG2278	FBgn0030017	4.01503	3.3991	2.26599	3.13541	2.79537	2.08632
slpr	FBgn0030018	12.1617	9.68651	9.58184	9.76031	9.21301	9.46554
CG2147	FBgn0030025	5.93904	7.01398	6.52155	7.11284	7.40435	3.69506
sni	FBgn0030026	3.5551	3.67501	3.25021	1.7989	2.41281	2.10339
CG15343	FBgn0030029	105.46	79.0152	27.6219	2.75685	5.82663	0.817795
CG1636	FBgn0030030	14.6523	15.2608	11.6981	14.3175	13.4738	14.5565
CG10555	FBgn0030034	11.2505	10.5103	8.46739	10.1515	11.1793	9.34799
CG11190	FBgn0030035	5.80722	3.76874	4.65427	4.61798	3.49726	3.00691
Miga	FBgn0030037	1.25085	3.21156	2.65474	2.24597	3.12506	1.82647
CG1440	FBgn0030038	55.8824	35.2429	36.9532	35.7692	37.6227	32.3277
CG12123	FBgn0030039	1.56836	1.97838	2.7412	1.82061	2.34018	2.88787
CG15347	FBgn0030040	25.7704	24.4666	34.2944	5.89067	11.193	5.87325
CG12112	FBgn0030048	15.0035	10.9713	9.09528	8.43725	16.6421	10.5652
Trf4-1	FBgn0030049	13.2609	15.6875	12.0586	11.8923	14.3542	14.2759
CG12065	FBgn0030052	11.0577	12.4596	19.3449	7.61943	12.5751	9.58149
CG12081	FBgn0030053	5.59063	5.18812	5.75568	4.8389	4.27275	4.78074
Caf1-180	FBgn0030054	16.5569	14.2362	9.0604	8.65816	13.3732	11.9741
CG12772	FBgn0030055	2.32122	2.01629	1.92068	2.39185	1.52304	0.683242
CG11284	FBgn0030056	6.43873	8.39277	7.03355	6.04175	6.89223	6.87638
Ppt1	FBgn0030057	3.00529	2.51499	2.06904	3.49575	2.18268	3.40893
CG2004	FBgn0030060	7.17144	11.8141	8.4669	7.92748	6.39019	14.4843
CG1785	FBgn0030061	12.6207	16.8741	22.3935	15.8393	16.7366	28.2415
CG1789	FBgn0030063	11.8715	12.0083	17.304	17.589	11.3635	14.3234
Rbm13	FBgn0030067	13.4277	15.2497	12.8642	10.0092	15.9163	17.7894
CG10962	FBgn0030073	3.0491	1.5385	3.86371	6.85782	3.56058	3.44885
CG15365	FBgn0030077	1.05142	1.22625	0.86323	1.54708	2.65483	2.64783
HP1b	FBgn0030082	19.8297	23.7822	18.0878	19.6257	20.3407	19.4599
CG7033	FBgn0030086	142.907	168.792	154.02	129.53	158.56	162.941
CG7766	FBgn0030087	4.74416	5.79827	5.74905	5.46132	5.37583	4.9252
Arfrp1	FBgn0030088	3.49921	6.00308	2.20939	6.90544	5.01693	2.97308
AP-1gamma	FBgn0030089	15.454	14.228	11.3494	13.6581	16.4447	12.2544
fend	FBgn0030090	15.5554	17.0611	9.25503	9.67394	14.5067	10.3376
CG7065	FBgn0030091	3.20526	3.03337	4.22531	3.47077	2.589	3.14929
fh	FBgn0030092	2.90921	5.3474	2.16102	2.22127	4.35438	4.64623
Bap111	FBgn0030093	11.9492	12.18	7.5085	7.89593	8.16188	7.03851
Zpr1	FBgn0030096	5.35376	4.23564	4.63326	4.61589	4.0701	7.53095
CG12121	FBgn0030109	11.2488	9.55572	11.8677	11.7696	7.01207	12.9766
CG17754	FBgn0030114	8.34831	6.53197	6.20129	5.70495	5.81665	4.96919
Cfp1	FBgn0030121	5.08823	4.23855	5.05936	3.6897	3.71165	4.80154
CG16892	FBgn0030122	1.17334	1.16691	2.27368	2.22321	2.02546	1.46002
RpS28b	FBgn0030136	163.103	284.883	184.016	120.914	184.143	356.085
CG15317	FBgn0030137	3.61914	1.83594	1.73443	1.34394	2.70388	0.93972
Gga	FBgn0030141	5.87689	5.65952	4.85053	5.60418	4.27596	6.02257
CG1354	FBgn0030151	18.7223	18.2157	33.6865	31.2169	22.9999	19.0236
CG15312	FBgn0030174	2.24952	2.03309	0.806685	1.48826	1.48286	1.31813
CG2972	FBgn0030177	3.72058	8.01601	6.61736	4.99827	4.91242	7.49867
CG2974	FBgn0030178	7.70526	3.55714	5.12741	7.12771	4.33747	3.94813
CG15309	FBgn0030183	24.5275	13.8135	13.8978	19.0089	16.7052	17.4666
Psf3	FBgn0030196	2.71141	3.06633	3.18647	3.26104	5.1773	3.29363
CG2889	FBgn0030206	2.10128	1.04222	2.03869	1.0931	1.18237	1.11224
PPP4R2r	FBgn0030208	16.5262	17.7999	15.0534	15.8947	14.3089	16.2518
CG15296	FBgn0030215	2.79176	1.79603	1.45164	1.14778	0.923686	0.998737
BTBD9	FBgn0030228	4.03769	3.96852	3.37419	2.42086	2.90685	3.93716
CG15211	FBgn0030234	6.15501	5.80178	15.8766	4.89418	6.34061	8.46892
CG15209	FBgn0030237	3.65294	2.26301	10.3112	19.7241	13.5634	23.6316
CG17333	FBgn0030239	3.75256	3.57651	4.05451	4.95564	2.50824	3.45785
CG2202	FBgn0030240	4.58237	3.35743	5.57385	4.286	4.54839	5.14848
feo	FBgn0030241	3.09927	3.46511	5.54889	3.26719	4.73275	8.45774
CG2186	FBgn0030243	18.6081	17.4901	13.149	13.9988	18.194	15.4199
CG1637	FBgn0030245	2.73154	2.31005	3.42937	3.38488	2.3973	2.9075
CG1582	FBgn0030246	1.74789	2.88826	4.24921	3.24776	2.67875	2.78136
CG11122	FBgn0030266	3.20421	2.61762	2.00496	1.98576	1.9497	2.47751
Klp10A	FBgn0030268	16.3082	17.5127	16.5318	19.7607	21.1004	18.0143
CDK2AP1	FBgn0030269	7.62741	5.41457	7.1897	6.0122	6.9617	7.57439
CG15201	FBgn0030272	0.984824	3.37903	1.17048	4.04891	4.99621	1.2331
Lint-1	FBgn0030274	5.40326	2.79953	7.00368	2.77308	5.19921	4.6703
Dlic	FBgn0030276	37.8338	36.5647	29.0987	28.5948	35.5659	31.7576
CG1657	FBgn0030286	1.23905	1.67691	1.44809	1.1275	1.03855	0.753549
GCS1	FBgn0030289	3.28541	3.53271	4.04658	5.8878	3.06594	4.94746
CG1738	FBgn0030291	0.723272	4.13604	1.96996	2.08152	4.25427	4.63587
CG11752	FBgn0030292	3.0288	7.79409	3.89974	5.97711	2.89499	2.88943
CG1737	FBgn0030293	12.4897	10.1466	10.3542	10.4976	8.86178	9.70254
Pa1	FBgn0030294	11.8324	20.8066	22.7644	22.8639	23.1631	21.1649
Sk1	FBgn0030300	2.06005	2.80026	3.66256	1.83274	1.71329	1.631
HP5	FBgn0030301	17.1718	16.5787	14.4674	13.6715	13.418	16.9756
CG1749	FBgn0030305	8.54197	8.26943	5.39587	12.1118	9.64323	10.5872
Spase25	FBgn0030306	32.7538	36.6261	32.7615	31.2654	49.1777	38.72
CG1572	FBgn0030309	68.3387	106.125	63.8421	33.9853	61.7102	30.5597
PGRP-SA	FBgn0030310	3.40606	5.27518	2.53009	1.47813	1.98257	1.18465
CG11697	FBgn0030313	9.17784	4.5702	7.66009	8.81848	7.84737	9.59172
CG11696	FBgn0030314	1.98234	1.17057	1.72861	1.66543	1.61593	0.886462
rho-4	FBgn0030318	24.8491	26.1886	18.6109	22.1548	25.1857	20.5343
CG2247	FBgn0030320	10.9177	13.0129	10.4839	11.9836	12.1254	12.1425
CG1703	FBgn0030321	20.4344	14.7644	15.2025	12.0128	14.5845	17.9942
CG2371	FBgn0030323	7.1116	5.19398	4.93812	6.10184	3.06907	5.18505
CG2444	FBgn0030326	28.5888	11.9145	25.703	20.9052	9.19133	8.2084
FucT6	FBgn0030327	3.446	4.38458	4.2492	4.61863	2.85037	1.60262
Amun	FBgn0030328	93.4116	80.0332	27.5298	25.8583	65.8043	59.2559
prtp	FBgn0030329	44.4642	47.4927	52.3906	43.3615	47.091	61.8736
Tango10	FBgn0030330	3.14428	2.96849	4.01024	4.90254	4.15474	3.58147
Karl	FBgn0030334	34.081	40.3504	32.8637	24.3102	30.3886	20.3836
CG1578	FBgn0030336	10.2642	10.8523	9.24632	8.4566	11.3876	11.7349
p24-1	FBgn0030341	11.0004	13.0458	9.8427	10.6898	10.064	12.6333
CG10347	FBgn0030342	1.68336	3.57735	3.78511	2.61869	3.06077	5.69662
ATP7	FBgn0030343	15.9873	13.831	13.3185	11.6868	12.3588	10.1057
CG2025	FBgn0030344	12.283	13.0427	11.1889	10.0608	10.5857	12.4516
CG1847	FBgn0030345	1.08464	2.79113	1.36967	1.42697	1.55508	0.921554
CG11802	FBgn0030346	2.60137	4.09089	4.34779	3.04808	1.64966	2.38473
CG10353	FBgn0030349	8.14582	6.17812	6.50541	5.84895	5.25109	6.53283
SelG	FBgn0030350	14.558	16.317	12.1117	6.60771	10.7894	9.68696
CG1840	FBgn0030351	9.91289	13.0227	2.9852	3.8552	3.39798	4.31304
Upf1	FBgn0030354	7.44604	7.35332	6.42763	6.5043	6.4918	4.4341
Sclp	FBgn0030357	3.38683	4.51026	3.37738	3.09005	4.14457	2.78008
regucalcin	FBgn0030362	881.109	912.112	799.816	462.568	429.933	203.4
[truncated: 4,710 more rows]
